# Supplementary material for: NF-Y Binding Site Architecture Defines a C-Fos Targeted Promoter Class
Source: PLoS One. 2016 Aug 12;11(8):e0160803. doi: 10.1371/journal.pone.0160803 (PMC4982600; doi:10.1371/journal.pone.0160803)
Supplement: S1 File — (BED) [file pone.0160803.s013.bed]

track name="P_FOS_only" description="FOS only of union comparison" visibility=3 url=
chr1	6639833	6640103
chr1	6662967	6663237
chr1	6844506	6844776
chr1	10458898	10459154
chr1	11795965	11796235
chr1	12039877	12040133
chr1	21059633	21059903
chr1	24116624	24116894
chr1	27189319	27189575
chr1	27816989	27817245
chr1	27998633	27998903
chr1	28241250	28241362
chr1	28559482	28559611
chr1	31231675	31231945
chr1	35325298	35325568
chr1	36689740	36690010
chr1	36852130	36852386
chr1	36863444	36863714
chr1	38478280	38478396
chr1	40626827	40627097
chr1	43824491	43824635
chr1	43855505	43855582
chr1	44440493	44440665
chr1	46268463	46268719
chr1	47139459	47139729
chr1	47697986	47698256
chr1	53163976	53164246
chr1	60280210	60280466
chr1	67390431	67390701
chr1	78148488	78148758
chr1	78695140	78695396
chr1	84972193	84972449
chr1	94313045	94313315
chr1	95007415	95007671
chr1	109825705	109825975
chr1	109969086	109969194
chr1	110881886	110881966
chr1	114447602	114447872
chr1	117664297	117664553
chr1	120838316	120838440
chr1	143913276	143913532
chr1	149783849	149784119
chr1	149870947	149871217
chr1	150480389	150480659
chr1	151170377	151170633
chr1	153538249	153538505
chr1	153539088	153539284
chr1	154928586	154928721
chr1	154955646	154955810
chr1	155904205	155904475
chr1	156265332	156265602
chr1	159750467	159750737
chr1	173572124	173572394
chr1	182991477	182991733
chr1	202311026	202311282
chr1	202896302	202896558
chr1	202928400	202928656
chr1	205819212	205819482
chr1	206138077	206138350
chr1	210001157	210001427
chr1	211849261	211849517
chr1	223888667	223888923
chr1	235491504	235491760
chr1	235668129	235668385
chr2	11485050	11485306
chr2	14772622	14772892
chr2	20793299	20793569
chr2	27273586	27273856
chr2	27805664	27805934
chr2	30669952	30670222
chr2	44395084	44395340
chr2	47630070	47630279
chr2	55278364	55278620
chr2	64680335	64680591
chr2	70418104	70418246
chr2	70475963	70476233
chr2	75059093	75059349
chr2	86668254	86668524
chr2	87303839	87304109
chr2	113402011	113402267
chr2	120124361	120124631
chr2	128458206	128458476
chr2	136288803	136289049
chr2	172778728	172778998
chr2	201936359	201936490
chr2	220042794	220043064
chr3	4508798	4509068
chr3	5020759	5021029
chr3	9439115	9439304
chr3	9975381	9975482
chr3	11178604	11178860
chr3	16577603	16577873
chr3	42846001	42846094
chr3	43147405	43147675
chr3	48481540	48481616
chr3	49027129	49027385
chr3	57678745	57679015
chr3	112280756	112280891
chr3	114866494	114866645
chr3	122512543	122512813
chr3	122920549	122920819
chr3	127310548	127310804
chr3	132136163	132136433
chr3	149191551	149191807
chr3	156543276	156543546
chr3	158288806	158289076
chr3	158519709	158519979
chr3	160394748	160395004
chr3	177158584	177158840
chr3	179280598	179280726
chr3	196065311	196065567
chr4	1723039	1723309
chr4	17616097	17616367
chr4	38859258	38859528
chr4	47465667	47465778
chr4	71705932	71706202
chr4	114683769	114684039
chr4	139935739	139935995
chr5	7869112	7869301
chr5	42993358	42993614
chr5	64858942	64859128
chr5	73980845	73981101
chr5	75013177	75013433
chr5	132299286	132299390
chr5	133706595	133706851
chr5	137800682	137800952
chr5	139780697	139780770
chr5	140027174	140027444
chr5	140090679	140090935
chr5	140098287	140098543
chr5	140105537	140105793
chr5	141303210	141303480
chr5	145214861	145215131
chr5	145826681	145826937
chr5	150826994	150827264
chr5	166711576	166711832
chr5	169758230	169758500
chr5	172410638	172410908
chr5	180649272	180649542
chr6	8102744	8102917
chr6	26204622	26204892
chr6	26285753	26286023
chr6	26286635	26286905
chr6	26521389	26521659
chr6	26537646	26537916
chr6	28047731	28048001
chr6	29690977	29691247
chr6	29910094	29910364
chr6	31082350	31082606
chr6	31744959	31745229
chr6	32145928	32146184
chr6	34203405	34203675
chr6	43027095	43027365
chr6	47623979	47624249
chr6	47666100	47666356
chr6	49430882	49431152
chr6	57178671	57178927
chr6	64281703	64281959
chr6	84937331	84937469
chr6	85474266	85474536
chr6	87865119	87865389
chr6	99282232	99282502
chr6	106773568	106773838
chr6	107780650	107780920
chr6	149867090	149867360
chr6	150346661	150346917
chr6	151773208	151773478
chr7	915883	916139
chr7	1177871	1178075
chr7	5570229	5570378
chr7	6488083	6488339
chr7	14031067	14031135
chr7	22862416	22862686
chr7	42971724	42971994
chr7	44925136	44925392
chr7	53879575	53879768
chr7	71877302	71877572
chr7	72298797	72298929
chr7	73868086	73868234
chr7	76751817	76751934
chr7	87856228	87856484
chr7	99613070	99613340
chr7	100253980	100254250
chr7	102389154	102389335
chr7	112063016	112063272
chr7	112727757	112728027
chr7	129932727	129932983
chr7	130080794	130081064
chr7	131594731	131595001
chr7	135412965	135413235
chr7	143077968	143078238
chr7	150076273	150076396
chr7	152456666	152456936
chr8	356775	357045
chr8	22844504	22844760
chr8	25316309	25316488
chr8	27631926	27632088
chr8	29815863	29816119
chr8	54755815	54755939
chr8	74332133	74332389
chr8	86157543	86157813
chr8	95487255	95487525
chr8	104033155	104033411
chr8	126103927	126104197
chr8	126442378	126442634
chr8	142350424	142350694
chr8	143781177	143781433
chr9	4984637	4984893
chr9	34329226	34329482
chr9	34620409	34620679
chr9	115983605	115983875
chr9	130341312	130341568
chr9	131843135	131843424
chr9	132250823	132251093
chr9	140009099	140009369
chr9	140446291	140446379
chrX	13670466	13670722
chrX	47420475	47420590
chrX	48114625	48114798
chrX	48165760	48165833
chrX	48216245	48216375
chrX	48815619	48815875
chrX	49126033	49126289
chrX	57617999	57618255
chrX	65382130	65382400
chrX	99899012	99899268
chrX	101975535	101975689
chrX	150151571	150151841
chrX	154254788	154255044
chr10	1095273	1095447
chr10	4868172	4868429
chr10	17497248	17497518
chr10	22605178	22605448
chr10	25351454	25351710
chr10	32217684	32217954
chr10	42970745	42971015
chr10	46090314	46090404
chr10	46222598	46222737
chr10	51827613	51827712
chr10	58120985	58121241
chr10	88428050	88428306
chr10	92680977	92681233
chr10	99052355	99052611
chr10	100206678	100206758
chr10	102790833	102791089
chr10	105238929	105239185
chr10	121410819	121411075
chr10	128111252	128111508
chr10	135267196	135267466
chr11	393254	393510
chr11	1785054	1785324
chr11	2950852	2951122
chr11	9482231	9482487
chr11	20408911	20409181
chr11	31531076	31531332
chr11	36310928	36311061
chr11	45743681	45743951
chr11	46867822	46867906
chr11	58874457	58874713
chr11	62414035	62414305
chr11	62538732	62538839
chr11	62599519	62599789
chr11	66115524	66115794
chr11	66725831	66726042
chr11	66742580	66742836
chr11	67797940	67798169
chr11	68227505	68227775
chr11	74660122	74660392
chr11	82782814	82783070
chr11	95523487	95523757
chr11	95658229	95658485
chr11	114165850	114166106
chr11	118306935	118307191
chr11	118992140	118992342
chr11	123985617	123985887
chr11	126081565	126081700
chr12	6960479	6960569
chr12	48214417	48214673
chr12	49075980	49076233
chr12	50678204	50678474
chr12	52586028	52586284
chr12	54378677	54378947
chr12	54674327	54674494
chr12	56109693	56109963
chr12	56211505	56211674
chr12	56223312	56223582
chr12	56236673	56236943
chr12	56367581	56367650
chr12	57505985	57506076
chr12	65153186	65153288
chr12	67662884	67663154
chr12	88535771	88536041
chr12	94954715	94954971
chr12	102456882	102457152
chr12	112451108	112451238
chr12	113859925	113860195
chr12	120315103	120315257
chr12	120638891	120639138
chr12	121342114	121342370
chr12	122750996	122751088
chr12	132568672	132568942
chr13	19755949	19756219
chr13	20532637	20532893
chr13	50159589	50159859
chr13	111522596	111522852
chr14	21852294	21852564
chr14	21905401	21905563
chr14	24583760	24584030
chr14	50087284	50087540
chr14	55879500	55879756
chr14	68283300	68283570
chr14	73392970	73393226
chr14	81894116	81894386
chr14	90421078	90421254
chr14	97263613	97263707
chr14	102783258	102783528
chr15	40331300	40331570
chr15	40885931	40886201
chr15	45571451	45571574
chr15	60690189	60690459
chr15	68522335	68522605
chr15	73926599	73926855
chr16	686655	686925
chr16	1524954	1525210
chr16	1728045	1728301
chr16	1832554	1833037
chr16	1877090	1877360
chr16	2570249	2570441
chr16	4664783	4665053
chr16	10479745	10479922
chr16	12069595	12069851
chr16	14109889	14110145
chr16	24855940	24856196
chr16	31366330	31366600
chr16	49315746	49316016
chr16	56642307	56642563
chr16	57844254	57844510
chr16	67224438	67224708
chr16	69796139	69796272
chr16	75301868	75302124
chr16	82203814	82204084
chr16	83986589	83986859
chr16	84538226	84538432
chr16	87425701	87425971
chr17	37617413	37617683
chr17	4699254	4699524
chr17	6915545	6915801
chr17	8022396	8022666
chr17	8022986	8023256
chr17	14204154	14204424
chr17	15244868	15245138
chr17	18218446	18218716
chr17	33760739	33760807
chr17	35969422	35969692
chr17	36981486	36981756
chr17	38257433	38257703
chr17	39222506	39222776
chr17	40719000	40719084
chr17	41150183	41150453
chr17	43697573	43697704
chr17	44302725	44302899
chr17	46018755	46018898
chr17	46970005	46970133
chr17	48045995	48046251
chr17	48228763	48229033
chr17	49199190	49199460
chr17	58754586	58754856
chr17	58755100	58755246
chr17	73150574	73150830
chr17	73840859	73841115
chr17	79212862	79213099
chr17	79479794	79480064
chr17	79519306	79519576
chr17	79895149	79895317
chr17	81009614	81009884
chr18	77866703	77866973
chr19	2739983	2740239
chr19	4246938	4247085
chr19	4535181	4535451
chr19	4671001	4671257
chr19	4867655	4867831
chr19	7587337	7587593
chr19	10362478	10362672
chr19	10811939	10812209
chr19	11639883	11640153
chr19	12792621	12792891
chr19	14530212	14530298
chr19	15490580	15490746
chr19	16008849	16009119
chr19	18385684	18385940
chr19	19249265	19249416
chr19	22235096	22235366
chr19	32836422	32836571
chr19	36103497	36103767
chr19	36239257	36239513
chr19	40324722	40324992
chr19	45681678	45682045
chr19	45927662	45927918
chr19	46242809	46242929
chr19	46272655	46272925
chr19	46916806	46917076
chr19	47220266	47220536
chr19	49540058	49540328
chr19	49990669	49990851
chr19	50143928	50144184
chr19	50706733	50706848
chr19	51754086	51754356
chr19	54663559	54663815
chr19	55721473	55721729
chr19	55850115	55850371
chr19	58193133	58193403
chr19	58962795	58963065
chr20	1448449	1448719
chr20	5451714	5451984
chr20	33681393	33681663
chr20	44509708	44509867
chr20	44718521	44718791
chr20	47538107	47538377
chr20	50180315	50180571
chr20	50419828	50420084
chr21	11098966	11099106
chr21	33651529	33651799
chr21	35013994	35014168
chr21	39493373	39493643
chr22	35795938	35796146
chr22	38301111	38301381
chr22	39190145	39190270
chr22	40440121	40440377
chr22	44208064	44208320
