# Supplementary material for: NF-Y Binding Site Architecture Defines a C-Fos Targeted Promoter Class
Source: PLoS One. 2016 Aug 12;11(8):e0160803. doi: 10.1371/journal.pone.0160803 (PMC4982600; doi:10.1371/journal.pone.0160803)
Supplement: S2 File — (BED) [file pone.0160803.s014.bed]

track name="P_inter" description="inter comparison of union FOS, union NFYB6" visibility=3 url=
chr1	150208464	150208781
chr1	713944	714308
chr1	1167297	1167661
chr1	1259989	1260153
chr1	1334663	1334953
chr1	1406903	1407267
chr1	1447283	1447647
chr1	1981613	1981847
chr1	2322918	2323282
chr1	3541329	3541582
chr1	3566593	3566818
chr1	6845045	6845332
chr1	6845354	6845523
chr1	7843860	7844224
chr1	8086273	8086637
chr1	8877588	8877952
chr1	9489007	9489231
chr1	9599196	9599560
chr1	9970608	9970972
chr1	10092718	10093082
chr1	10270329	10270625
chr1	11120119	11120214
chr1	11322560	11322849
chr1	11865991	11866355
chr1	15943705	15944085
chr1	17445898	17446090
chr1	19229322	19229517
chr1	20988003	20988150
chr1	21113260	21113351
chr1	21672007	21672159
chr1	22778073	22778437
chr1	23670848	23671098
chr1	24194636	24195016
chr1	24286131	24286313
chr1	24742060	24742324
chr1	24969436	24969618
chr1	25559637	25560017
chr1	25756538	25756902
chr1	25757125	25757397
chr1	26560437	26560801
chr1	26798833	26799018
chr1	27248017	27248205
chr1	27339276	27339552
chr1	27560719	27561083
chr1	27718871	27719235
chr1	27816600	27816860
chr1	28052303	28052436
chr1	28562348	28562712
chr1	28585683	28586047
chr1	29213503	29213666
chr1	29676536	29676916
chr1	31769650	31769829
chr1	32403927	32404098
chr1	32757425	32757789
chr1	33116511	33116875
chr1	33502439	33502722
chr1	33546439	33546819
chr1	33937940	33938139
chr1	35658752	35659062
chr1	36023230	36023375
chr1	36235457	36235821
chr1	36851654	36851779
chr1	36916038	36916229
chr1	36929877	36930257
chr1	38156274	38156448
chr1	38158060	38158231
chr1	38325248	38325456
chr1	39325342	39325706
chr1	41328043	41328148
chr1	41826761	41826878
chr1	43147909	43148106
chr1	43311998	43312266
chr1	43920198	43920562
chr1	44115503	44115850
chr1	44172923	44173287
chr1	44435505	44435662
chr1	44820945	44821096
chr1	45140127	45140434
chr1	45956901	45957162
chr1	45957078	45957442
chr1	46049052	46049230
chr1	46152710	46153090
chr1	46598679	46598893
chr1	46598878	46599242
chr1	47184652	47185016
chr1	47779785	47780044
chr1	51425736	51426100
chr1	52344424	52344647
chr1	52831875	52832239
chr1	54665691	54665784
chr1	54872104	54872204
chr1	55230223	55230479
chr1	55352851	55353068
chr1	59249611	59249975
chr1	62191012	62191376
chr1	68150653	68151017
chr1	70876745	70877012
chr1	85156059	85156423
chr1	85527795	85528049
chr1	87379931	87380295
chr1	87794040	87794148
chr1	89458489	89458853
chr1	89990306	89990442
chr1	90286437	90286576
chr1	100715351	100715543
chr1	109234678	109235042
chr1	109584577	109584941
chr1	109940516	109940827
chr1	111506754	111506916
chr1	112938600	112938863
chr1	113615691	113615799
chr1	113932859	113933046
chr1	117602649	117602892
chr1	118148352	118148716
chr1	120838519	120838899
chr1	146989536	146989900
chr1	149858207	149858489
chr1	149859514	149859736
chr1	150254574	150254954
chr1	150336370	150336734
chr1	150459674	150459977
chr1	150488027	150488230
chr1	150602044	150602397
chr1	150669581	150670019
chr1	151119079	151119443
chr1	151170729	151171093
chr1	151254357	151254773
chr1	151319719	151319926
chr1	151431912	151432023
chr1	151762967	151763367
chr1	151967441	151967805
chr1	153643452	153643721
chr1	153700287	153700494
chr1	153895425	153895799
chr1	154531171	154531551
chr1	154946841	154947243
chr1	154974559	154974807
chr1	155197290	155197545
chr1	155214346	155214710
chr1	155278442	155278588
chr1	155579727	155580091
chr1	155715257	155715637
chr1	156163507	156163871
chr1	156470615	156470795
chr1	160990850	160991319
chr1	161136046	161136261
chr1	161195515	161195702
chr1	164528141	164528310
chr1	167522888	167523268
chr1	167691078	167691247
chr1	169336970	169337232
chr1	169455150	169455420
chr1	169863370	169863555
chr1	169863489	169863853
chr1	170501185	170501317
chr1	171750562	171750900
chr1	173446023	173446387
chr1	179050912	179051276
chr1	181057621	181057826
chr1	182573421	182573785
chr1	184723961	184724268
chr1	197115656	197116023
chr1	198906581	198906700
chr1	200589792	200590044
chr1	201915539	201915919
chr1	201924450	201924652
chr1	202830709	202830935
chr1	202976292	202976553
chr1	204380880	204381244
chr1	205196875	205197105
chr1	205290844	205291043
chr1	205719356	205719471
chr1	205782276	205782472
chr1	207494703	207495083
chr1	207818191	207818571
chr1	207925212	207925421
chr1	211752448	211752812
chr1	211848965	211849143
chr1	212458343	212458698
chr1	213031322	213031702
chr1	213123759	213123880
chr1	214776346	214776644
chr1	220445637	220446017
chr1	221915378	221915778
chr1	225965285	225965649
chr1	226112032	226112124
chr1	227127695	227127991
chr1	227751034	227751398
chr1	228594416	228594780
chr1	228645539	228645830
chr1	229761710	229762074
chr1	236958384	236958663
chr1	241683048	241683279
chr1	244211633	244211759
chr1	246729546	246729714
chr1	247241951	247242315
chr1	247267616	247267868
chr1	249132149	249132438
chr1	249132342	249132706
chr2	3381501	3381865
chr2	8821961	8822188
chr2	9144053	9144257
chr2	9771121	9771346
chr2	10091587	10091967
chr2	10183450	10183635
chr2	10262631	10262935
chr2	20646657	20646865
chr2	24270341	24270721
chr2	27008548	27008949
chr2	27274405	27274531
chr2	27603701	27603842
chr2	27712507	27712887
chr2	30369342	30369558
chr2	32502743	32503107
chr2	38830145	38830337
chr2	39102952	39103159
chr2	43823108	43823394
chr2	43864216	43864431
chr2	44395387	44395850
chr2	46925715	46926079
chr2	48133626	48133990
chr2	48541320	48541520
chr2	55277772	55277941
chr2	55746513	55746877
chr2	55920799	55921163
chr2	61292786	61293020
chr2	61765415	61765660
chr2	62081657	62081877
chr2	64067885	64068164
chr2	64834232	64834526
chr2	65283267	65283527
chr2	65454741	65454907
chr2	66660550	66660742
chr2	67624247	67624611
chr2	69614322	69614509
chr2	70141781	70142219
chr2	71454143	71454411
chr2	73460345	73460561
chr2	74055937	74056094
chr2	74425431	74425790
chr2	74881152	74881434
chr2	85822578	85822920
chr2	86116007	86116387
chr2	88926940	88927494
chr2	97405769	97405894
chr2	97481804	97482168
chr2	97523726	97524041
chr2	98280489	98280699
chr2	111435646	111435741
chr2	113032917	113033281
chr2	113522159	113522389
chr2	121010081	121010445
chr2	128283955	128284335
chr2	128784958	128785054
chr2	128785550	128785930
chr2	131100207	131100381
chr2	136499090	136499470
chr2	136633941	136634305
chr2	153573905	153574127
chr2	157189234	157189406
chr2	158732715	158733095
chr2	159313248	159313406
chr2	163200399	163200779
chr2	169312606	169312807
chr2	169746870	169747151
chr2	172949988	172950352
chr2	172967579	172967857
chr2	172967755	172968119
chr2	176033099	176033190
chr2	178077012	178077376
chr2	191745301	191745681
chr2	191878792	191879156
chr2	198317935	198318167
chr2	198669201	198669295
chr2	200775705	200776085
chr2	201828417	201828551
chr2	202898142	202898522
chr2	203499493	203499857
chr2	208576005	208576369
chr2	219134842	219135005
chr2	219824045	219824425
chr2	220094304	220094574
chr2	223725482	223725862
chr2	232329085	232329449
chr2	232329293	232329657
chr2	232378938	232379302
chr2	232573071	232573211
chr2	232645959	232646294
chr2	234763181	234763354
chr2	238875399	238875544
chr2	239148693	239148820
chr2	239197411	239197565
chr2	240322609	240322973
chr2	240322992	240323087
chr2	241525903	241526267
chr2	242626087	242626451
chr3	8543259	8543615
chr3	9690883	9691247
chr3	9791555	9791649
chr3	9885655	9885786
chr3	10157072	10157452
chr3	10289839	10290203
chr3	13521468	13521832
chr3	15901163	15901527
chr3	16306583	16306749
chr3	25706376	25706626
chr3	27410733	27411113
chr3	27526028	27526215
chr3	31573752	31574116
chr3	33482091	33482364
chr3	33482392	33482575
chr3	37034643	37035063
chr3	38178586	38178950
chr3	38206508	38206800
chr3	40494774	40494956
chr3	42003883	42004123
chr3	42530671	42531051
chr3	43663597	43663961
chr3	44903268	44903445
chr3	45730575	45730939
chr3	48229990	48230088
chr3	48230052	48230416
chr3	48633065	48633429
chr3	48672834	48673100
chr3	48754637	48754804
chr3	49044593	49044845
chr3	49131480	49131611
chr3	49761289	49761653
chr3	49824070	49824164
chr3	49893872	49894236
chr3	49977356	49977458
chr3	50365590	50365852
chr3	51422436	51422747
chr3	51975957	51976159
chr3	52091348	52091542
chr3	52570403	52570701
chr3	56591126	56591253
chr3	57261629	57261764
chr3	61237161	61237333
chr3	61237275	61237655
chr3	66551392	66551756
chr3	67048394	67048723
chr3	93698891	93699011
chr3	98620437	98620801
chr3	100211226	100211557
chr3	105588021	105588385
chr3	107241576	107241940
chr3	113415592	113415956
chr3	114866232	114866434
chr3	119813505	119814126
chr3	120461325	120461542
chr3	121468478	121468908
chr3	121553824	121554204
chr3	122134829	122135193
chr3	126422888	126423145
chr3	127309608	127309785
chr3	127842580	127842828
chr3	127871768	127872132
chr3	128369497	128369861
chr3	128902653	128903017
chr3	129147331	129147695
chr3	132756879	132757259
chr3	133292041	133292405
chr3	136580910	136581037
chr3	140660384	140660748
chr3	141456858	141457222
chr3	141868303	141868482
chr3	152878979	152879272
chr3	155572257	155572621
chr3	156272902	156273174
chr3	160167514	160167894
chr3	160283339	160283489
chr3	167452774	167453138
chr3	167813687	167813900
chr3	170626373	170626737
chr3	172468323	172468609
chr3	180707454	180707818
chr3	182817285	182817574
chr3	183353164	183353528
chr3	185303753	185303969
chr3	185826851	185827095
chr3	186288304	186288495
chr3	193853639	193853871
chr3	195163790	195164127
chr3	196669394	196669486
chr3	197686823	197687027
chr4	331381	331664
chr4	775593	775731
chr4	1283437	1283576
chr4	1340600	1340964
chr4	1714268	1714632
chr4	2263895	2264255
chr4	2470695	2470883
chr4	2845313	2845677
chr4	3076218	3076409
chr4	4861125	4861489
chr4	6202210	6202337
chr4	6271321	6271685
chr4	6674858	6675222
chr4	7069779	7070143
chr4	48782317	48782675
chr4	52709046	52709311
chr4	53578318	53578682
chr4	54232099	54232479
chr4	68411087	68411451
chr4	71858047	71858427
chr4	76555551	76555931
chr4	76598519	76598883
chr4	78077864	78078073
chr4	83955979	83956343
chr4	84376849	84377229
chr4	87515186	87515550
chr4	89513434	89513635
chr4	100871430	100871613
chr4	102268661	102269041
chr4	113558011	113558391
chr4	122744912	122745276
chr4	123653698	123653882
chr4	128553914	128554278
chr4	130014577	130014957
chr4	134070213	134070593
chr4	141445214	141445318
chr4	148538309	148538673
chr4	149363571	149363935
chr4	156680016	156680157
chr4	166034034	166034164
chr4	166248594	166248902
chr4	170541403	170541767
chr4	174255465	174255883
chr4	176986877	176987054
chr4	177240851	177241016
chr4	184425610	184425990
chr4	184580203	184580583
chr5	8457696	8457812
chr5	31532177	31532512
chr5	32313148	32313561
chr5	41904034	41904321
chr5	43313654	43313974
chr5	44808841	44809056
chr5	53606288	53606652
chr5	53606488	53606852
chr5	55290751	55291115
chr5	59995897	59996106
chr5	60240830	60241025
chr5	60627755	60628119
chr5	65891939	65892319
chr5	68462726	68463064
chr5	70882599	70882699
chr5	70882967	70883145
chr5	74632831	74633079
chr5	89705496	89705725
chr5	90610127	90610491
chr5	108745743	108745961
chr5	112196715	112197079
chr5	112312268	112312375
chr5	118406493	118406661
chr5	122847641	122847847
chr5	131132680	131133044
chr5	131520397	131520761
chr5	137089977	137090341
chr5	137548980	137549182
chr5	137878919	137879117
chr5	138739749	138739888
chr5	139780954	139781514
chr5	140079908	140080033
chr5	142149764	142149909
chr5	145562272	145562406
chr5	145582843	145583242
chr5	148737272	148737540
chr5	149340056	149340352
chr5	149792388	149792629
chr5	150537323	150537483
chr5	150632536	150632702
chr5	151150996	151151544
chr5	153825326	153825588
chr5	156569859	156569953
chr5	159546479	159546732
chr5	162864392	162864587
chr5	162887418	162887595
chr5	162930011	162930375
chr5	172483098	172483462
chr5	175964896	175965131
chr5	176739218	176739512
chr5	176778753	176779088
chr5	176778975	176779339
chr5	176853209	176853555
chr5	177580853	177581016
chr5	177631350	177631560
chr5	179125692	179126004
chr5	179159595	179159869
chr5	179719026	179719229
chr5	179921141	179921505
chr6	7590307	7590452
chr6	7726137	7726309
chr6	16129065	16129445
chr6	20401804	20402083
chr6	21593732	21594000
chr6	21593897	21594261
chr6	26020531	26020655
chr6	26032272	26032619
chr6	26033692	26034056
chr6	26043989	26044203
chr6	26045342	26045645
chr6	26056657	26056827
chr6	26103757	26104121
chr6	26123165	26123529
chr6	26124201	26124382
chr6	26156353	26156717
chr6	26158057	26158316
chr6	26199504	26199800
chr6	26216916	26217159
chr6	26251593	26251957
chr6	26271590	26271966
chr6	26273007	26273175
chr6	26383187	26383407
chr6	26402244	26402624
chr6	26421428	26421792
chr6	26457949	26458313
chr6	26659887	26660251
chr6	27099594	27099919
chr6	27100553	27100797
chr6	27114611	27114911
chr6	27775744	27775895
chr6	27777717	27777813
chr6	27782607	27782775
chr6	27806124	27806358
chr6	27832822	27833186
chr6	27840075	27840302
chr6	27858582	27858730
chr6	27860861	27861225
chr6	29716826	29716935
chr6	30181195	30181388
chr6	30457083	30457317
chr6	30585006	30585370
chr6	30687825	30688189
chr6	31126078	31126386
chr6	31239921	31240026
chr6	31324955	31325107
chr6	31430820	31431013
chr6	31587707	31587928
chr6	31587846	31588210
chr6	31588187	31588350
chr6	31707538	31707831
chr6	31783123	31783233
chr6	31795311	31795424
chr6	31830547	31830911
chr6	32096083	32096246
chr6	32098068	32098248
chr6	32407386	32407750
chr6	32557436	32557816
chr6	32604899	32605279
chr6	32634373	32634737
chr6	32784722	32785086
chr6	32920868	32921057
chr6	33079838	33080218
chr6	33172286	33172490
chr6	33216978	33217234
chr6	33285710	33285969
chr6	33290835	33291199
chr6	33377984	33378209
chr6	33385922	33386286
chr6	33422140	33422504
chr6	35227011	35227375
chr6	35310043	35310407
chr6	36561964	36562178
chr6	38670849	38671091
chr6	39902091	39902471
chr6	40345763	40346143
chr6	42713700	42714080
chr6	42952107	42952364
chr6	43138848	43139030
chr6	46097530	46097678
chr6	46138547	46138927
chr6	46620465	46620829
chr6	52149646	52149906
chr6	52528996	52529243
chr6	62996058	62996303
chr6	80247067	80247338
chr6	80714256	80714427
chr6	80816122	80816486
chr6	82957349	82957713
chr6	90539446	90539580
chr6	91296887	91297251
chr6	107077300	107077557
chr6	112194606	112194845
chr6	116601042	116601343
chr6	116892353	116892582
chr6	116937288	116937668
chr6	119670801	119671181
chr6	122720436	122720800
chr6	132834253	132834396
chr6	134373616	134373980
chr6	136571410	136571780
chr6	137143452	137143816
chr6	144416617	144416981
chr6	150067576	150067788
chr6	155635520	155635884
chr6	160147821	160148185
chr6	160210601	160210965
chr6	160211296	160211550
chr6	166796497	166796611
chr6	170863103	170863467
chr7	1199812	1200002
chr7	1499083	1499447
chr7	2671269	2671633
chr7	2884138	2884291
chr7	4815023	4815387
chr7	6048728	6048984
chr7	6144255	6144408
chr7	8008192	8008446
chr7	11012725	11012953
chr7	16685358	16685518
chr7	16793276	16793397
chr7	21466891	21467255
chr7	23053688	23053973
chr7	23221398	23221762
chr7	25019798	25020162
chr7	25164818	25165182
chr7	26904208	26904588
chr7	27702497	27702786
chr7	30066321	30066511
chr7	30174240	30174385
chr7	30544453	30544744
chr7	38217555	38217792
chr7	39772821	39773127
chr7	44122159	44122369
chr7	44530045	44530425
chr7	44836026	44836271
chr7	44887742	44888098
chr7	48074961	48075123
chr7	56119265	56119531
chr7	56174137	56174391
chr7	64023396	64023694
chr7	64126307	64126590
chr7	64254598	64254887
chr7	64363483	64363704
chr7	64467017	64467258
chr7	65540633	65540793
chr7	65670181	65670307
chr7	66093786	66093928
chr7	66309763	66310127
chr7	66461490	66461854
chr7	66767501	66767694
chr7	72936555	72936817
chr7	73097698	73097887
chr7	75368245	75368393
chr7	75623939	75624141
chr7	77427696	77428118
chr7	86974885	86975037
chr7	92157849	92158213
chr7	95951277	95951657
chr7	97735912	97736276
chr7	97881446	97881677
chr7	99070231	99070461
chr7	99102172	99102328
chr7	99746371	99746558
chr7	99774943	99775116
chr7	100136442	100136880
chr7	100209519	100209843
chr7	106301482	106301846
chr7	106809217	106809441
chr7	107531495	107531641
chr7	108210066	108210430
chr7	111846625	111846732
chr7	112579836	112580200
chr7	112580040	112580404
chr7	115850454	115850552
chr7	120590662	120590846
chr7	121784288	121784549
chr7	127292042	127292268
chr7	128379178	128379444
chr7	128784481	128784861
chr7	128864224	128864604
chr7	129074085	129074315
chr7	129710145	129710509
chr7	132766861	132766982
chr7	132937570	132937910
chr7	134331298	134331614
chr7	137686847	137687254
chr7	138144481	138144861
chr7	140179142	140179522
chr7	148581260	148581640
chr7	148725797	148725896
chr7	149535291	149535474
chr7	150725261	150725611
chr7	151216942	151217090
chr7	152160955	152161319
chr7	154719916	154720280
chr7	155089229	155089593
chr7	156803249	156803613
chr8	93978257	93978637
chr8	681151	681515
chr8	1771945	1772131
chr8	6565812	6565907
chr8	9009073	9009275
chr8	9413190	9413475
chr8	21966854	21967105
chr8	23386142	23386506
chr8	25315938	25316253
chr8	27168767	27169131
chr8	28347706	28348070
chr8	37619983	37620138
chr8	38243838	38244006
chr8	38854072	38854224
chr8	41386527	41386822
chr8	42010247	42010457
chr8	42698346	42698710
chr8	57124182	57124344
chr8	66546450	66546630
chr8	73920971	73921118
chr8	74884545	74884784
chr8	95565618	95565982
chr8	95907940	95908089
chr8	95961501	95961865
chr8	98655973	98656353
chr8	103424933	103425297
chr8	103667923	103668203
chr8	110551647	110551884
chr8	117961364	117961744
chr8	118532743	118532996
chr8	120651045	120651288
chr8	124408941	124409113
chr8	126010441	126010805
chr8	128747448	128747812
chr8	133787223	133787587
chr8	144450772	144451028
chr8	144691803	144692041
chr8	145159100	145159503
chr8	145743194	145743343
chr9	2015053	2015302
chr9	4792691	4792939
chr9	33473881	33474151
chr9	34049233	34049339
chr9	34178810	34179174
chr9	34523105	34523469
chr9	34646572	34646698
chr9	34651959	34652118
chr9	34989311	34989733
chr9	35072569	35072964
chr9	35815033	35815364
chr9	35829076	35829285
chr9	36190677	36190962
chr9	37465467	37465999
chr9	37485662	37486026
chr9	38069691	38070055
chr9	74526103	74526360
chr9	80911884	80912067
chr9	82186425	82186745
chr9	91925879	91926149
chr9	95055912	95056199
chr9	95527078	95527442
chr9	96792915	96793127
chr9	99180643	99180858
chr9	99212207	99212475
chr9	99382098	99382398
chr9	104160862	104161077
chr9	104295704	104295896
chr9	115480283	115480647
chr9	117349808	117350188
chr9	123476723	123477020
chr9	125590808	125590983
chr9	125693792	125694009
chr9	125702981	125703345
chr9	126030716	126031096
chr9	127905813	127905984
chr9	128003624	128003999
chr9	129676941	129677122
chr9	130158933	130159444
chr9	130477917	130478097
chr9	130693046	130693237
chr9	130743208	130743572
chr9	130829611	130829919
chr9	130830149	130830340
chr9	131486431	131486546
chr9	131580671	131580775
chr9	131798615	131798979
chr9	131940508	131940805
chr9	132597548	132597724
chr9	133569011	133569146
chr9	133588007	133588327
chr9	135230541	135230653
chr9	135905792	135906098
chr9	136344164	136344407
chr9	137029683	137030075
chr9	139760797	139760888
chr9	139780633	139780946
chr9	139964902	139965266
chr9	140095237	140095553
chr9	140135312	140135794
chr9	140484875	140485239
chrX	13671082	13671327
chrX	14891281	14891645
chrX	15353627	15354004
chrX	16804221	16804585
chrX	18443475	18443673
chrX	19361876	19362070
chrX	23801159	23801250
chrX	40439998	40440208
chrX	44732188	44732371
chrX	46696142	46696435
chrX	47004457	47004641
chrX	47077324	47077688
chrX	47509949	47510151
chrX	48056211	48056575
chrX	48379963	48380260
chrX	48432563	48432927
chrX	48660196	48660340
chrX	48776227	48776591
chrX	48958041	48958402
chrX	49125546	49125921
chrX	53024593	53024973
chrX	53111263	53111534
chrX	53123019	53123367
chrX	55743829	55744209
chrX	63425545	63425909
chrX	64754679	64754805
chrX	71401265	71401579
chrX	74493692	74493984
chrX	77151047	77151150
chrX	77359560	77359717
chrX	106449623	106449848
chrX	107334691	107335055
chrX	112084642	112085022
chrX	128977731	128978095
chrX	130037059	130037423
chrX	133507164	133507405
chrX	134477883	134478247
chrX	134478088	134478452
chrX	135962872	135963132
chrX	151999268	151999594
chrX	153363290	153363501
chrX	153607099	153607463
chrX	153656810	153657048
chrX	154444428	154444801
chrX	155110742	155111106
chr10	977572	977936
chr10	1034075	1034455
chr10	1094820	1095092
chr10	3214986	3215097
chr10	3827579	3827776
chr10	5454227	5454591
chr10	5855388	5855542
chr10	12110814	12110962
chr10	13203374	13203573
chr10	14879999	14880191
chr10	15130750	15130939
chr10	25013469	25013849
chr10	28966193	28966557
chr10	42863310	42863690
chr10	46168152	46168436
chr10	69597755	69598119
chr10	70660761	70661125
chr10	70748305	70748557
chr10	70939322	70939702
chr10	71211076	71211278
chr10	72142337	72142701
chr10	74033540	74033648
chr10	74451606	74451970
chr10	74868872	74869236
chr10	75544986	75545122
chr10	75757742	75757860
chr10	76585882	76586424
chr10	79789131	79789511
chr10	81205350	81205714
chr10	88281453	88281817
chr10	91461138	91461356
chr10	94352720	94352879
chr10	97453589	97453969
chr10	99205732	99205823
chr10	99400369	99400502
chr10	99400417	99400781
chr10	101190324	101190710
chr10	101380161	101380571
chr10	101418959	101419323
chr10	102106585	102106949
chr10	102133172	102133357
chr10	103911839	103912219
chr10	103985838	103986218
chr10	104005011	104005128
chr10	104005105	104005318
chr10	104263483	104263863
chr10	104503383	104503688
chr10	104677793	104678144
chr10	105156189	105156398
chr10	105991962	105992326
chr10	112631384	112631748
chr10	120788874	120788969
chr10	124913742	124913932
chr10	126107516	126107621
chr10	129924706	129924829
chr10	131909253	131909602
chr11	535465	535829
chr11	560810	561026
chr11	568354	568718
chr11	809776	809945
chr11	1593399	1593763
chr11	3013545	3013771
chr11	3400339	3400611
chr11	4629418	4629647
chr11	6255787	6256167
chr11	8008584	8008948
chr11	9594875	9595239
chr11	10830481	10830687
chr11	10879484	10879848
chr11	11643503	11643867
chr11	13298911	13299263
chr11	13689864	13690255
chr11	14913752	14913912
chr11	17298047	17298347
chr11	18720058	18720438
chr11	19138575	19138727
chr11	22647268	22647613
chr11	27494372	27494494
chr11	28129681	28129874
chr11	34379530	34379769
chr11	34460265	34460536
chr11	43701984	43702348
chr11	43902160	43902524
chr11	47788922	47789307
chr11	57434838	57435011
chr11	57435236	57435616
chr11	57479713	57480056
chr11	58346259	58346623
chr11	59383252	59383987
chr11	61717135	61717339
chr11	61891199	61891563
chr11	62359176	62359277
chr11	62494603	62494983
chr11	62495176	62495648
chr11	62521532	62521997
chr11	63741720	63742043
chr11	63741884	63742248
chr11	64490644	64490835
chr11	64546242	64546436
chr11	64684717	64684895
chr11	64691442	64691822
chr11	64781568	64781667
chr11	64902490	64902673
chr11	65122062	65122193
chr11	65153955	65154136
chr11	65382819	65383154
chr11	65479320	65479700
chr11	65601222	65601496
chr11	65819528	65819892
chr11	66056492	66056907
chr11	66313416	66313780
chr11	66383939	66384139
chr11	67159346	67159516
chr11	67888805	67889035
chr11	68227886	68228207
chr11	68816188	68816446
chr11	70116530	70116813
chr11	71159428	71159632
chr11	73472322	73472502
chr11	73694313	73694516
chr11	74459599	74459963
chr11	75526058	75526336
chr11	76155596	76155960
chr11	77705825	77706090
chr11	77706019	77706383
chr11	82612613	82612822
chr11	82867766	82868017
chr11	82867909	82868273
chr11	85339300	85339664
chr11	86013109	86013473
chr11	95522952	95523258
chr11	105893004	105893387
chr11	107798781	107798948
chr11	107992038	107992402
chr11	108093264	108093628
chr11	108464445	108464536
chr11	108535502	108535866
chr11	111797615	111797979
chr11	118928002	118928157
chr11	118938269	118938649
chr11	118966201	118966563
chr11	119204947	119205250
chr11	121163290	121163452
chr11	122932772	122933152
chr11	125462438	125462675
chr11	126138799	126139065
chr11	129684473	129684837
chr11	129684672	129685036
chr11	129939542	129939922
chr11	133826819	133827076
chr12	93323143	93323329
chr12	56754025	56754198
chr12	1799938	1800302
chr12	2921706	2921889
chr12	2999921	3000072
chr12	4430054	4430418
chr12	6579984	6580126
chr12	6602962	6603198
chr12	6665111	6665475
chr12	6961037	6961238
chr12	7052574	7052938
chr12	7125928	7126292
chr12	7282802	7283027
chr12	9102237	9102601
chr12	14927065	14927404
chr12	21654464	21654817
chr12	27676878	27677128
chr12	42632037	42632417
chr12	49110478	49110842
chr12	49259612	49259840
chr12	49504626	49504867
chr12	49582778	49583158
chr12	49658639	49658861
chr12	49716748	49717124
chr12	50101345	50101537
chr12	50135103	50135289
chr12	50505491	50505739
chr12	51566813	51567045
chr12	53473149	53473425
chr12	53661907	53662134
chr12	53773189	53773956
chr12	53835322	53835556
chr12	53894381	53894761
chr12	54393751	54394115
chr12	54718663	54718950
chr12	54891397	54891570
chr12	56390846	56391071
chr12	56521726	56521819
chr12	56617935	56618190
chr12	56694034	56694398
chr12	56727748	56727990
chr12	56882111	56882491
chr12	57039726	57040067
chr12	57472508	57472854
chr12	57848852	57849216
chr12	57914225	57914589
chr12	58087620	58087941
chr12	58138575	58138866
chr12	58146155	58146535
chr12	67662575	67662670
chr12	68726153	68726330
chr12	76742155	76742373
chr12	77459326	77459535
chr12	92539556	92539920
chr12	95611254	95611618
chr12	96252591	96252768
chr12	104323745	104324176
chr12	104359431	104359600
chr12	105724179	105724559
chr12	107380765	107381129
chr12	108908721	108909006
chr12	110011380	110011582
chr12	110318270	110318634
chr12	111806791	111807155
chr12	112123752	112123909
chr12	112563168	112563365
chr12	113658816	113659170
chr12	114211449	114211617
chr12	116715335	116715715
chr12	117175998	117176146
chr12	118573746	118573917
chr12	121019187	121019307
chr12	121124128	121124492
chr12	121124680	121125044
chr12	121837682	121837899
chr12	123011429	123011809
chr12	123717760	123717932
chr12	123868480	123868747
chr12	124068842	124069206
chr12	124155529	124155728
chr12	124196611	124196991
chr12	127256821	127257201
chr12	129308403	129308767
chr12	131648651	131649015
chr13	20207649	20207801
chr13	20437767	20438019
chr13	27131516	27131896
chr13	28194649	28195013
chr13	29293034	29293306
chr13	31040052	31040257
chr13	41240646	41241026
chr13	52027184	52027304
chr13	52586347	52586491
chr13	53029402	53029703
chr13	60738016	60738285
chr13	60970319	60970683
chr13	73301773	73302126
chr13	95253827	95254191
chr13	96329100	96329464
chr13	97874345	97874709
chr13	98085186	98085566
chr13	101327113	101327360
chr13	103249091	103249455
chr13	103451287	103451522
chr13	107187945	107188215
chr13	110438825	110439189
chr13	111267745	111267895
chr13	113951270	113951650
chr14	20923097	20923461
chr14	20929607	20930151
chr14	21457950	21458134
chr14	21737539	21737962
chr14	23388434	23388700
chr14	23398505	23398869
chr14	23755274	23755692
chr14	23938499	23938876
chr14	24610765	24611129
chr14	24641046	24641249
chr14	36295304	36295668
chr14	36789872	36790064
chr14	39644171	39644459
chr14	45603627	45603991
chr14	45604936	45605179
chr14	52455985	52456349
chr14	53019250	53019609
chr14	54863437	54863755
chr14	55658232	55658532
chr14	58764882	58765326
chr14	64010023	64010286
chr14	64108619	64108801
chr14	64109049	64109413
chr14	67707720	67708084
chr14	68286388	68286490
chr14	69262931	69263311
chr14	69445992	69446270
chr14	70345941	70346132
chr14	73360843	73360942
chr14	73524869	73525233
chr14	73925212	73925583
chr14	74551088	74551463
chr14	74960274	74960490
chr14	75469353	75469638
chr14	75530663	75530946
chr14	78083025	78083531
chr14	82000198	82000548
chr14	86400710	86401090
chr14	90920674	90921038
chr14	91526967	91527563
chr14	92572902	92573266
chr14	94492523	94492743
chr14	94547546	94547677
chr14	96000985	96001401
chr14	99947319	99947511
chr14	100070587	100070951
chr14	100704901	100705265
chr14	100842624	100842815
chr14	103058695	103059059
chr14	103851542	103851745
chr14	104181765	104182087
chr14	105219328	105219518
chr14	105487424	105487565
chr15	30918140	30918520
chr15	31618752	31618922
chr15	33486889	33487269
chr15	34394096	34394287
chr15	40732984	40733164
chr15	40861287	40861651
chr15	41245453	41245638
chr15	41522980	41523344
chr15	41523330	41523521
chr15	41575915	41576253
chr15	42264821	42264950
chr15	43212940	43213283
chr15	44038343	44038723
chr15	44487491	44487743
chr15	45003552	45003717
chr15	45694409	45694562
chr15	49103232	49103699
chr15	49103232	49103678
chr15	49255976	49256340
chr15	50978816	50979196
chr15	56757322	56757466
chr15	59041910	59042274
chr15	59397151	59397433
chr15	63795998	63796362
chr15	64455207	64455571
chr15	65117942	65118322
chr15	66084514	66084878
chr15	66678930	66679294
chr15	69113198	69113469
chr15	69706518	69706731
chr15	69744891	69745255
chr15	70390176	70390462
chr15	71055746	71056110
chr15	73925669	73926033
chr15	74833152	74833516
chr15	75932509	75932785
chr15	76603712	76604076
chr15	76628855	76628986
chr15	77223851	77224105
chr15	77363339	77363703
chr15	78799548	78799912
chr15	79164997	79165361
chr15	80351753	80352117
chr15	81616416	81616780
chr15	82338383	82338747
chr15	83478119	83478480
chr15	84115909	84116289
chr15	85144128	85144304
chr15	85174461	85174709
chr15	85923616	85923768
chr15	86338110	86338302
chr15	89164399	89164596
chr15	89631356	89631716
chr15	90118450	90118792
chr15	90895266	90895617
chr15	91260404	91260612
chr15	91537639	91538003
chr15	93425531	93425786
chr15	98503520	98503900
chr15	99791429	99791598
chr15	101142645	101142807
chr16	103570	103790
chr16	764870	765234
chr16	838496	838695
chr16	1359030	1359169
chr16	1662022	1662236
chr16	1993107	1993487
chr16	2205358	2205541
chr16	2205480	2205667
chr16	2264771	2265127
chr16	2479115	2479331
chr16	2587712	2588092
chr16	2932708	2932938
chr16	3019033	3019397
chr16	3184826	3184987
chr16	3333212	3333513
chr16	3451048	3451165
chr16	3493425	3493789
chr16	4743364	4743728
chr16	4784235	4784615
chr16	4817059	4817423
chr16	4852838	4853126
chr16	4897232	4897519
chr16	8768324	8768479
chr16	9185201	9185461
chr16	11036233	11036597
chr16	11439132	11439349
chr16	11891219	11891321
chr16	15982485	15982630
chr16	18812844	18813185
chr16	18937852	18938216
chr16	19533269	19533633
chr16	21964240	21964604
chr16	22385908	22386111
chr16	25042938	25043135
chr16	25122952	25123046
chr16	28962002	28962367
chr16	29801841	29802029
chr16	30381780	30382374
chr16	30382450	30382814
chr16	30441286	30441650
chr16	30457173	30457388
chr16	30538649	30539013
chr16	30597066	30597235
chr16	30661870	30662087
chr16	30759560	30759664
chr16	31105969	31106333
chr16	31711769	31711964
chr16	31724375	31724646
chr16	31884969	31885172
chr16	46655240	46655470
chr16	46723375	46723609
chr16	46865337	46865701
chr16	50058937	50059154
chr16	50775760	50775887
chr16	53537175	53537606
chr16	54963003	54963367
chr16	56485231	56485493
chr16	56965861	56966050
chr16	57219941	57220207
chr16	57278789	57279153
chr16	57769211	57769719
chr16	58163266	58163522
chr16	58663714	58664155
chr16	66914255	66914521
chr16	67281337	67281717
chr16	67514969	67515349
chr16	68278998	68279362
chr16	69458251	69458511
chr16	70323384	70323641
chr16	74700720	74701024
chr16	75019045	75019218
chr16	75498565	75498763
chr16	77224499	77224868
chr16	81130154	81130258
chr16	81348223	81348603
chr16	83932524	83932888
chr16	84224518	84224882
chr16	84651660	84651920
chr16	87351013	87351104
chr16	88729476	88729804
chr16	89557004	89557339
chr16	89883000	89883171
chr17	1588132	1588334
chr17	1619498	1619897
chr17	1733040	1733404
chr17	3796318	3796502
chr17	4613563	4613718
chr17	5322955	5323171
chr17	6347577	6347754
chr17	6939087	6939467
chr17	7137699	7138079
chr17	7307399	7307584
chr17	7307501	7307865
chr17	8055734	8055863
chr17	8093486	8093717
chr17	8113893	8114080
chr17	8198700	8198863
chr17	8534155	8534469
chr17	12921252	12921547
chr17	16283937	16284301
chr17	16341879	16342243
chr17	16945520	16945730
chr17	17109583	17109963
chr17	17875717	17876152
chr17	17942536	17942811
chr17	18086560	18086924
chr17	18128582	18128946
chr17	18163716	18163891
chr17	18266814	18267002
chr17	18759423	18759661
chr17	19551894	19552258
chr17	21156630	21157010
chr17	21187832	21188069
chr17	26368208	26368787
chr17	26645951	26646260
chr17	26972051	26972415
chr17	27181808	27182172
chr17	27621137	27621282
chr17	28705770	28706134
chr17	30263892	30264272
chr17	33569894	33570063
chr17	34136372	34136502
chr17	34842261	34842625
chr17	36908818	36909078
chr17	37557743	37558123
chr17	37558713	37559077
chr17	38136593	38136957
chr17	38443865	38444200
chr17	38574127	38574559
chr17	39684497	39684861
chr17	39942976	39943373
chr17	40075145	40075509
chr17	40306924	40307288
chr17	40540457	40540746
chr17	40575122	40575486
chr17	40729696	40729882
chr17	40829089	40829310
chr17	41277307	41277671
chr17	41322236	41322600
chr17	41623791	41623987
chr17	42147965	42148345
chr17	42422472	42422691
chr17	42634448	42634667
chr17	43025083	43025254
chr17	43394530	43394713
chr17	45726994	45727347
chr17	45973107	45973618
chr17	46125370	46125697
chr17	46184734	46184986
chr17	46655610	46655990
chr17	46688248	46688612
chr17	47492217	47492362
chr17	47785561	47785681
chr17	47841498	47841878
chr17	53499248	53499612
chr17	56595205	56595683
chr17	57408876	57409040
chr17	58677337	58677523
chr17	59940847	59941043
chr17	60143229	60143414
chr17	61627487	61627873
chr17	61699344	61699611
chr17	61699533	61699897
chr17	62223032	62223396
chr17	66031712	66031935
chr17	72744577	72744728
chr17	72869441	72869627
chr17	72983461	72983825
chr17	73179029	73179184
chr17	73285497	73285658
chr17	73452559	73452727
chr17	73663128	73663492
chr17	73775855	73776252
chr17	73851428	73851574
chr17	74236515	74236767
chr17	74260986	74261402
chr17	74722549	74722929
chr17	76183107	76183319
chr17	77070921	77071045
chr17	77770944	77771209
chr17	79008550	79008914
chr17	79196720	79196985
chr17	79268987	79269351
chr17	79633589	79633782
chr17	79650743	79651029
chr17	79818514	79818935
chr17	79980815	79981188
chr17	79995546	79995820
chr17	80056570	80056840
chr17	80477339	80477703
chr17	80656546	80656827
chr18	9136688	9136854
chr18	12991021	12991385
chr18	14132515	14132680
chr18	21017777	21018141
chr18	23806217	23806597
chr18	32820820	32821026
chr18	39534988	39535206
chr18	44526502	44526882
chr18	45457399	45457763
chr18	47088093	47088473
chr18	48405245	48405609
chr18	48724182	48724351
chr18	55102387	55102612
chr18	55289010	55289184
chr18	59854234	59854438
chr18	71959292	71959462
chr19	633493	633857
chr19	639651	639783
chr19	797190	797480
chr19	1039945	1040135
chr19	1103758	1104075
chr19	1205517	1205730
chr19	1449826	1450206
chr19	1490915	1491111
chr19	1605638	1606002
chr19	1605851	1606215
chr19	1652860	1653093
chr19	2151552	2151916
chr19	2269284	2269459
chr19	2475828	2476192
chr19	2783386	2783766
chr19	2785181	2785545
chr19	2841289	2841517
chr19	2866840	2867399
chr19	2900575	2900942
chr19	2944883	2945232
chr19	2977184	2977548
chr19	3094136	3094500
chr19	3557573	3557764
chr19	3558054	3558418
chr19	3572585	3572865
chr19	3626963	3627327
chr19	4153433	4153753
chr19	4342686	4343143
chr19	4402272	4402563
chr19	4471628	4471903
chr19	4472010	4472338
chr19	4639185	4639549
chr19	4670199	4670579
chr19	4723695	4724059
chr19	4791292	4791477
chr19	4968607	4969124
chr19	5340829	5341209
chr19	5904345	5904709
chr19	6110576	6110866
chr19	6279882	6280246
chr19	6424786	6425252
chr19	6425190	6425397
chr19	6737549	6737958
chr19	7006379	7006759
chr19	7694518	7694716
chr19	7894664	7895098
chr19	8008690	8008784
chr19	8070559	8070670
chr19	8408138	8408327
chr19	8477920	8478284
chr19	8509605	8509969
chr19	9434251	9434615
chr19	9945815	9945981
chr19	10491184	10491544
chr19	10679709	10679967
chr19	10764628	10764992
chr19	10828163	10828767
chr19	11266536	11266755
chr19	11456901	11457265
chr19	11485151	11485432
chr19	11545955	11546189
chr19	11708143	11708322
chr19	11849706	11850026
chr19	11877678	11877921
chr19	11924942	11925142
chr19	12035753	12036006
chr19	12202941	12203141
chr19	12273762	12273901
chr19	12405580	12405919
chr19	12444406	12444685
chr19	12476452	12476612
chr19	12511911	12512275
chr19	12551819	12552021
chr19	12595624	12595719
chr19	12662238	12662604
chr19	12721508	12721872
chr19	12847643	12848119
chr19	13001619	13001843
chr19	13049116	13049416
chr19	13858559	13858691
chr19	13905885	13906271
chr19	14117063	14117549
chr19	14228522	14228897
chr19	14247379	14247779
chr19	14606915	14607179
chr19	14640188	14640413
chr19	15236549	15236808
chr19	15529728	15530117
chr19	16296038	16296215
chr19	16607001	16607205
chr19	16683109	16683489
chr19	16770910	16771152
chr19	17377786	17378281
chr19	17414142	17414506
chr19	17420087	17420464
chr19	17530558	17530922
chr19	17580992	17581212
chr19	17858198	17858522
chr19	17970543	17970723
chr19	18303534	18304024
chr19	18303534	18304008
chr19	18314923	18315340
chr19	18392336	18392700
chr19	18433856	18434036
chr19	18654362	18654526
chr19	19030318	19030494
chr19	19174312	19174846
chr19	19496236	19496619
chr19	19729385	19729749
chr19	19779354	19779732
chr19	19843780	19844144
chr19	19932502	19932729
chr19	19976533	19976717
chr19	20011567	20011782
chr19	20150169	20150549
chr19	20188510	20188890
chr19	20277755	20278135
chr19	20607611	20607991
chr19	20748560	20748767
chr19	20844249	20844629
chr19	21105913	21106136
chr19	21203274	21203511
chr19	21264821	21265053
chr19	21324732	21324893
chr19	21541679	21541775
chr19	21579810	21579976
chr19	21950267	21950631
chr19	22034750	22035130
chr19	23433049	23433429
chr19	23578209	23578404
chr19	23869927	23870203
chr19	23941557	23941937
chr19	23945661	23945799
chr19	24097410	24097790
chr19	24216038	24216418
chr19	32896390	32896754
chr19	33166054	33166303
chr19	33462855	33463228
chr19	33864396	33864760
chr19	36119654	36119970
chr19	36138931	36139265
chr19	36248685	36249098
chr19	36266174	36266400
chr19	36485836	36486200
chr19	36505135	36505398
chr19	36545540	36545843
chr19	36822619	36822999
chr19	37288132	37288348
chr19	37742407	37742787
chr19	38720270	38720634
chr19	38893590	38893750
chr19	39421319	39421598
chr19	39616153	39616453
chr19	39832853	39833058
chr19	39881756	39881979
chr19	39902826	39903190
chr19	40950236	40950379
chr19	40950596	40950778
chr19	41082572	41082887
chr19	41098205	41098386
chr19	41256607	41256971
chr19	42580079	42580318
chr19	42724258	42724507
chr19	42901044	42901354
chr19	45393981	45394279
chr19	45873812	45874036
chr19	46148786	46149150
chr19	46195721	46195962
chr19	46498425	46498710
chr19	47291719	47292083
chr19	47551792	47552119
chr19	47633792	47634172
chr19	48018304	48018668
chr19	48867434	48867699
chr19	48972221	48972582
chr19	49140777	49141013
chr19	49457778	49458142
chr19	49468390	49468579
chr19	49496527	49496809
chr19	49622271	49622635
chr19	50179898	50180373
chr19	50269591	50270242
chr19	50528762	50529014
chr19	51399837	51400217
chr19	51869644	51870008
chr19	51869846	51870210
chr19	52429857	52430237
chr19	52692930	52693222
chr19	54640681	54641055
chr19	54641012	54641446
chr19	54960173	54960359
chr19	55677944	55678216
chr19	55850700	55851298
chr19	55919555	55919748
chr19	55972997	55973394
chr19	57862344	57862708
chr19	57900978	57901342
chr19	57922311	57922675
chr19	57946478	57946842
chr19	57988776	57989156
chr19	57998908	57999272
chr19	58090144	58090508
chr19	58257922	58258286
chr19	58280886	58281084
chr19	58326181	58326545
chr19	58427884	58428264
chr19	58790108	58790402
chr19	58892490	58892786
chr19	58898295	58898675
chr19	58919804	58920168
chr19	58978321	58978500
chr20	590852	591232
chr20	814247	814384
chr20	5107272	5107375
chr20	5931176	5931360
chr20	17662881	17663132
chr20	20693410	20693774
chr20	23331083	23331447
chr20	23338850	23339020
chr20	25388093	25388473
chr20	30192908	30193127
chr20	30311323	30311613
chr20	30326893	30327155
chr20	31407387	31407751
chr20	32274082	32274446
chr20	32308171	32308349
chr20	33104031	33104255
chr20	34330354	34330568
chr20	36322303	36322519
chr20	37554763	37555126
chr20	37590684	37591048
chr20	40247000	40247240
chr20	42086084	42086298
chr20	43514117	43514497
chr20	44044639	44044806
chr20	44440905	44441329
chr20	44485981	44486296
chr20	45035242	45035431
chr20	45985471	45985644
chr20	48770273	48770452
chr20	49126693	49127057
chr20	49347634	49347998
chr20	54967237	54967479
chr20	58508675	58508778
chr20	60813324	60813604
chr20	60877841	60878041
chr20	60982338	60982467
chr20	61569158	61569522
chr20	62496362	62496606
chr21	30365223	30365509
chr21	33031713	33032093
chr21	34852231	34852595
chr21	34915084	34915467
chr21	35014436	35014691
chr21	35987476	35987840
chr21	36421478	36421842
chr21	38738757	38739121
chr21	40721259	40721382
chr21	43099130	43099494
chr21	43916382	43916746
chr21	44313155	44313348
chr21	45759036	45759416
chr21	47604318	47604682
chr21	47648665	47649029
chr21	47743741	47743995
chr21	47878596	47878735
chr22	18111534	18111714
chr22	19132169	19132371
chr22	19467225	19467494
chr22	20004319	20004564
chr22	20067565	20067769
chr22	21368430	21368810
chr22	21399949	21400329
chr22	21996331	21996631
chr22	22006269	22006470
chr22	22090125	22090489
chr22	24181198	24181376
chr22	24372831	24373145
chr22	24384303	24384476
chr22	29137774	29138138
chr22	29196443	29196807
chr22	29999264	29999369
chr22	29999387	29999496
chr22	31364923	31365287
chr22	31477023	31477387
chr22	32517644	32518024
chr22	36784050	36784491
chr22	37172093	37172543
chr22	38054277	38054629
chr22	38054461	38054825
chr22	38071390	38071554
chr22	38203670	38204034
chr22	38240355	38240636
chr22	39101488	39101670
chr22	39151870	39152234
chr22	39915967	39916331
chr22	40440494	40440850
chr22	41032751	41032926
chr22	41601216	41601387
chr22	41763061	41763425
chr22	41864609	41864901
chr22	42228855	42229017
chr22	42486721	42487085
chr22	43411145	43411452
chr22	43739242	43739622
chr22	44351091	44351471
chr22	50312089	50312298
chr22	50353838	50354202
chr22	50639149	50639513
chr22	51021368	51021577
