# Supplementary material for: NF-Y Binding Site Architecture Defines a C-Fos Targeted Promoter Class
Source: PLoS One. 2016 Aug 12;11(8):e0160803. doi: 10.1371/journal.pone.0160803 (PMC4982600; doi:10.1371/journal.pone.0160803)
Supplement: S3 File — (BED) [file pone.0160803.s015.bed]

track name="NFYB only" description="NFYB only of union comparison" visibility=3 url=
chr1	192544612	192544992
chr1	935369	935749
chr1	954739	955119
chr1	1009554	1009918
chr1	1550605	1550985
chr1	3999469	3999833
chr1	6453643	6454023
chr1	9129591	9129971
chr1	9648545	9648909
chr1	10532439	10532819
chr1	15852816	15853180
chr1	19811977	19812357
chr1	19923123	19923487
chr1	20915189	20915553
chr1	21766412	21766792
chr1	24285479	24285843
chr1	24306808	24307188
chr1	25291592	25291776
chr1	25942806	25943170
chr1	26856048	26856428
chr1	27648496	27648876
chr1	28099322	28099702
chr1	28520250	28520614
chr1	29557252	29557632
chr1	31538490	31538870
chr1	32479149	32479529
chr1	32860083	32860287
chr1	33721008	33721388
chr1	35450961	35451341
chr1	35734038	35734418
chr1	36348535	36348915
chr1	36851748	36852112
chr1	36916168	36916532
chr1	38230714	38231094
chr1	38512484	38512864
chr1	39957141	39957307
chr1	40254437	40254817
chr1	40420669	40420831
chr1	40942415	40942795
chr1	42846214	42846594
chr1	43232633	43233013
chr1	45205251	45205631
chr1	45265673	45266053
chr1	45308780	45309160
chr1	45965602	45965966
chr1	46599085	46599449
chr1	46712584	46712964
chr1	52870039	52870403
chr1	64669036	64669416
chr1	76540132	76540512
chr1	86173855	86174235
chr1	86861851	86862215
chr1	89358280	89358447
chr1	89738534	89738914
chr1	90460377	90460741
chr1	91487642	91488006
chr1	93645961	93646325
chr1	94374941	94375321
chr1	94703048	94703428
chr1	99127064	99127444
chr1	100817041	100817421
chr1	100817649	100818029
chr1	109419423	109419803
chr1	110090974	110091354
chr1	111888737	111889117
chr1	113498718	113499098
chr1	114354823	114355203
chr1	117664689	117664875
chr1	119910221	119910585
chr1	120254341	120254705
chr1	149909240	149909493
chr1	150039059	150039439
chr1	150241327	150241691
chr1	150849123	150849487
chr1	151227039	151227265
chr1	153509058	153509422
chr1	154244810	154245190
chr1	154842647	154843027
chr1	154909583	154909947
chr1	155164342	155164722
chr1	155231880	155232260
chr1	155246818	155247182
chr1	155911166	155911530
chr1	155948202	155948582
chr1	156736824	156737204
chr1	160001555	160001935
chr1	160039967	160040347
chr1	160254857	160255221
chr1	160336668	160337048
chr1	161039690	161040070
chr1	161228254	161228634
chr1	161474960	161475340
chr1	161676492	161676872
chr1	162531022	162531386
chr1	165796111	165796491
chr1	165796623	165797003
chr1	166845444	166845824
chr1	169075277	169075641
chr1	170043637	170044017
chr1	171283034	171283398
chr1	173793637	173793789
chr1	176176703	176177083
chr1	177139804	177140184
chr1	178994801	178995181
chr1	179262661	179263025
chr1	179923391	179923755
chr1	180991909	180992273
chr1	183440786	183441150
chr1	185286359	185286739
chr1	185703291	185703655
chr1	192777898	192778278
chr1	200379200	200379580
chr1	200992700	200993080
chr1	202317474	202317838
chr1	202779792	202780156
chr1	202937131	202937511
chr1	203274421	203274801
chr1	207206023	207206387
chr1	207226328	207226708
chr1	207669340	207669720
chr1	212208891	212209255
chr1	212873820	212874200
chr1	220959920	220960284
chr1	222790861	222791225
chr1	223537692	223538072
chr1	224517951	224518331
chr1	224622429	224622809
chr1	228612948	228613328
chr1	229643885	229644265
chr1	230778010	230778390
chr1	233086060	233086440
chr1	233749170	233749373
chr1	235291983	235292363
chr1	236046879	236047243
chr1	236305624	236306004
chr1	241804478	241804842
chr1	241804685	241805049
chr1	243419005	243419369
chr1	244623576	244623956
chr1	244815976	244816356
chr2	232259304	232259684
chr2	9983249	9983629
chr2	10182843	10183207
chr2	10221119	10221499
chr2	12856718	12857098
chr2	17699536	17699916
chr2	23607815	23608195
chr2	25264709	25265089
chr2	29093384	29093764
chr2	29117280	29117660
chr2	33824302	33824682
chr2	37193604	37193984
chr2	38604578	38604958
chr2	42588537	42588901
chr2	43453715	43454095
chr2	45236590	45236713
chr2	45236966	45237330
chr2	46524161	46524525
chr2	47403759	47404123
chr2	48010025	48010405
chr2	48667351	48667731
chr2	54342401	54342765
chr2	55844767	55845147
chr2	61765722	61765864
chr2	62423013	62423393
chr2	63815715	63816079
chr2	65215371	65215751
chr2	65357295	65357659
chr2	65659430	65659810
chr2	68384824	68385204
chr2	68479555	68479935
chr2	69968814	69969194
chr2	70520783	70521163
chr2	73144516	73144896
chr2	84686950	84687314
chr2	84743318	84743698
chr2	85581550	85581914
chr2	85765995	85766375
chr2	86333083	86333447
chr2	88355156	88355536
chr2	96068216	96068596
chr2	98262225	98262605
chr2	99347580	99347960
chr2	100106356	100106736
chr2	105953486	105953866
chr2	111878248	111878628
chr2	113403218	113403582
chr2	118771606	118771986
chr2	120517058	120517422
chr2	131113365	131113729
chr2	151344066	151344430
chr2	159824908	159825288
chr2	160761173	160761553
chr2	162164680	162165044
chr2	175113183	175113563
chr2	187350650	187351030
chr2	192542498	192542878
chr2	193059497	193059877
chr2	197036143	197036507
chr2	198569836	198570216
chr2	203240647	203241027
chr2	203879222	203879602
chr2	208634577	208634957
chr2	209130705	209131085
chr2	209223730	209224110
chr2	211036045	211036409
chr2	211341451	211341562
chr2	219262621	219263001
chr2	220083538	220083902
chr2	220142795	220143175
chr2	220408451	220408831
chr2	222436971	222437351
chr2	225450377	225450757
chr2	230786677	230787057
chr2	234160053	234160433
chr2	239112980	239113360
chr2	241374526	241374890
chr3	5229092	5229456
chr3	13114769	13115149
chr3	13462409	13462789
chr3	15140704	15141084
chr3	15247339	15247719
chr3	15901775	15902155
chr3	27764041	27764421
chr3	28282725	28283105
chr3	32726581	32726961
chr3	33138502	33138882
chr3	33759570	33759950
chr3	37284555	37284935
chr3	44626094	44626474
chr3	47555099	47555479
chr3	47844237	47844617
chr3	49142243	49142623
chr3	49395607	49395971
chr3	49449541	49449668
chr3	49466587	49466951
chr3	49467149	49467291
chr3	49711064	49711428
chr3	50126063	50126443
chr3	51534114	51534478
chr3	52274122	52274486
chr3	52931392	52931772
chr3	53164544	53164924
chr3	53925830	53926194
chr3	55522403	55522783
chr3	56717180	56717560
chr3	57583014	57583378
chr3	69133852	69134232
chr3	72149700	72150080
chr3	72496312	72496417
chr3	85007645	85008009
chr3	98250574	98250784
chr3	99979434	99979814
chr3	105085217	105085597
chr3	107941130	107941510
chr3	111393251	111393615
chr3	111697480	111697844
chr3	112218296	112218676
chr3	113775488	113775669
chr3	114866727	114866964
chr3	119182410	119182790
chr3	119217133	119217497
chr3	119396052	119396432
chr3	122295375	122295755
chr3	123680028	123680408
chr3	124654125	124654505
chr3	126076131	126076511
chr3	128598199	128598579
chr3	128880064	128880444
chr3	129158751	129159131
chr3	134513880	134514260
chr3	136471285	136471665
chr3	136537145	136537509
chr3	136676504	136676868
chr3	138313040	138313420
chr3	139108418	139108798
chr3	142838415	142838795
chr3	146262489	146262853
chr3	149095325	149095689
chr3	150041610	150041974
chr3	152552397	152552777
chr3	169482716	169483080
chr3	171529138	171529502
chr3	172428724	172429104
chr3	179322427	179322541
chr3	179370382	179370762
chr3	183165172	183165536
chr3	183852000	183852380
chr3	183967292	183967656
chr3	184279115	184279495
chr3	189348777	189349157
chr3	190231609	190231989
chr3	190580403	190580767
chr3	194406286	194406650
chr3	194991732	194992096
chr3	196159217	196159597
chr3	196230385	196230765
chr4	1857710	1858090
chr4	1872577	1872941
chr4	4249855	4250235
chr4	6576702	6577066
chr4	13485855	13486235
chr4	15779741	15780121
chr4	20701806	20702170
chr4	24586100	24586464
chr4	37688003	37688367
chr4	38525465	38525845
chr4	38806408	38806788
chr4	39699515	39699895
chr4	41936129	41936493
chr4	41936841	41937205
chr4	41992285	41992649
chr4	46125962	46126342
chr4	47486261	47486641
chr4	47487053	47487433
chr4	47840360	47840740
chr4	48018517	48018897
chr4	48832811	48833191
chr4	53728200	53728580
chr4	54243609	54243989
chr4	54930670	54931050
chr4	56252252	56252616
chr4	56261855	56262219
chr4	56719535	56719899
chr4	57253890	57254254
chr4	57843669	57844033
chr4	76649579	76649943
chr4	77134950	77135314
chr4	77869882	77870262
chr4	82392958	82393338
chr4	83351445	83351825
chr4	83719896	83720276
chr4	83812295	83812675
chr4	87855826	87856206
chr4	88312245	88312625
chr4	89205716	89205985
chr4	100737594	100737974
chr4	105416113	105416493
chr4	108852444	108852808
chr4	108910725	108911089
chr4	109571265	109571645
chr4	110223964	110224328
chr4	113152717	113153081
chr4	113206802	113207182
chr4	113437535	113437915
chr4	119606311	119606675
chr4	119757134	119757514
chr4	120375746	120376110
chr4	122791586	122791950
chr4	128703200	128703580
chr4	128801831	128802195
chr4	138453524	138453904
chr4	141678024	141678404
chr4	144480420	144480800
chr4	147442877	147443257
chr4	152148916	152149296
chr4	156297963	156298343
chr4	164415453	164415833
chr4	175750318	175750698
chr4	185395698	185396062
chr4	186064150	186064530
chr4	190861846	190862210
chr5	5422370	5422734
chr5	14581713	14581870
chr5	16465780	16466144
chr5	36242220	36242442
chr5	40679781	40680161
chr5	43192054	43192434
chr5	43515151	43515515
chr5	43557686	43558066
chr5	54468891	54469271
chr5	54529349	54529713
chr5	54603508	54603625
chr5	54830896	54831043
chr5	54831023	54831387
chr5	56203706	56204086
chr5	61601712	61602092
chr5	61708355	61708735
chr5	65221324	65221704
chr5	67511295	67511675
chr5	68530433	68530813
chr5	73937183	73937563
chr5	82373264	82373366
chr5	86708638	86709018
chr5	89825405	89825769
chr5	92918666	92918797
chr5	95158357	95158721
chr5	96270810	96271190
chr5	100238993	100239103
chr5	107717933	107718297
chr5	109024820	109025184
chr5	113697507	113697887
chr5	114880295	114880675
chr5	114961683	114962047
chr5	118603656	118604036
chr5	118787914	118788294
chr5	126366180	126366544
chr5	130506463	130506630
chr5	130971035	130971415
chr5	131826412	131826776
chr5	131892471	131892851
chr5	133304257	133304637
chr5	133561959	133562339
chr5	133841828	133842192
chr5	133983472	133983836
chr5	134073389	134073769
chr5	138725514	138725894
chr5	138940674	138941054
chr5	140998501	140998881
chr5	148205912	148206276
chr5	148786150	148786530
chr5	149535299	149535679
chr5	150225734	150226114
chr5	150399878	150400258
chr5	158527233	158527613
chr5	158689823	158690203
chr5	166353231	166353611
chr5	168006671	168007035
chr5	170735996	170736290
chr5	171615198	171615562
chr5	171710921	171711301
chr5	174151302	174151666
chr5	175964170	175964550
chr5	176924578	176924942
chr5	176944003	176944367
chr5	177018911	177019291
chr5	177540358	177540738
chr5	178286665	178287045
chr5	179637130	179637494
chr6	2245713	2246093
chr6	2765460	2765840
chr6	7313352	7313732
chr6	7389823	7390203
chr6	10722954	10723334
chr6	10839202	10839582
chr6	11537532	11537912
chr6	15246120	15246500
chr6	18264622	18264986
chr6	20212533	20212897
chr6	24667074	24667454
chr6	24719341	24719721
chr6	25962510	25962874
chr6	26017840	26018220
chr6	26021539	26021903
chr6	26183665	26184045
chr6	26217872	26218252
chr6	26224199	26224563
chr6	26235179	26235349
chr6	26251066	26251303
chr6	27356318	27356698
chr6	27835206	27835570
chr6	28863238	28863602
chr6	28864020	28864384
chr6	28891595	28891975
chr6	30538910	30539290
chr6	31542963	31543343
chr6	31705676	31706056
chr6	32908647	32909011
chr6	32909231	32909611
chr6	32936434	32936814
chr6	32977265	32977645
chr6	33547905	33548269
chr6	37321566	37321946
chr6	37786975	37787355
chr6	39693027	39693407
chr6	40345187	40345567
chr6	41863142	41863250
chr6	41863522	41863902
chr6	42714471	42714851
chr6	43138455	43138568
chr6	43337227	43337607
chr6	49754867	49755231
chr6	52226567	52226947
chr6	53213696	53214020
chr6	56911207	56911571
chr6	56954660	56955040
chr6	72130563	72130801
chr6	74171365	74171533
chr6	74363668	74364048
chr6	75994504	75994884
chr6	79788013	79788393
chr6	82463032	82463263
chr6	84937632	84937996
chr6	87864607	87864987
chr6	89673252	89673632
chr6	89790196	89790560
chr6	90062415	90062779
chr6	94129297	94129677
chr6	106958508	106958888
chr6	108395828	108396208
chr6	109703687	109704067
chr6	110501061	110501425
chr6	110736692	110737056
chr6	111580289	111580669
chr6	114178316	114178696
chr6	114194440	114194820
chr6	117923578	117923942
chr6	117996381	117996761
chr6	126070421	126070801
chr6	130031224	130031588
chr6	134272936	134273300
chr6	136172536	136172900
chr6	143771772	143772136
chr6	150244159	150244523
chr6	150262883	150263263
chr6	153324010	153324390
chr6	155636102	155636482
chr6	161695073	161695453
chr6	167412377	167412757
chr6	170580911	170581291
chr6	170893619	170893983
chr7	148958	149338
chr7	2442815	2443195
chr7	2884228	2884592
chr7	3340583	3340963
chr7	5463450	5463814
chr7	5862532	5862912
chr7	6523608	6523988
chr7	7221902	7222266
chr7	17979989	17980353
chr7	21467484	21467864
chr7	22396591	22396971
chr7	22862782	22863162
chr7	27135529	27135893
chr7	27170441	27170805
chr7	30323817	30324181
chr7	33168794	33169174
chr7	39988997	39989377
chr7	44163164	44163348
chr7	45128958	45129338
chr7	45808418	45808782
chr7	54826867	54827079
chr7	66119190	66119554
chr7	73256926	73257306
chr7	75508076	75508456
chr7	86849764	86850128
chr7	87505517	87505897
chr7	89964230	89964610
chr7	92747265	92747415
chr7	93633645	93633757
chr7	94023870	94024250
chr7	95226169	95226350
chr7	97501662	97502026
chr7	99517047	99517427
chr7	100425036	100425400
chr7	100808780	100809144
chr7	117823930	117824294
chr7	121036270	121036634
chr7	134001603	134001983
chr7	134143865	134143965
chr7	137531482	137531862
chr7	142985191	142985332
chr7	148892327	148892707
chr7	148982160	148982540
chr7	150676126	150676506
chr7	150929302	150929682
chr8	8558940	8559320
chr8	10697332	10697712
chr8	11058867	11059247
chr8	11324962	11325342
chr8	11351060	11351216
chr8	11652848	11653228
chr8	12613022	12613402
chr8	17780079	17780459
chr8	19674630	19675010
chr8	21999229	21999609
chr8	22224507	22224887
chr8	23082467	23082847
chr8	27630674	27631054
chr8	33424554	33424918
chr8	37552996	37553376
chr8	37707233	37707613
chr8	38239665	38240045
chr8	49834002	49834172
chr8	55014436	55014816
chr8	55015056	55015420
chr8	55047183	55047563
chr8	66556020	66556400
chr8	67525361	67525741
chr8	70378770	70379134
chr8	71581249	71581613
chr8	74888244	74888624
chr8	74903385	74903765
chr8	80680259	80680639
chr8	81397548	81397928
chr8	82192481	82192861
chr8	87354445	87354809
chr8	92082264	92082628
chr8	94928796	94929160
chr8	95835175	95835555
chr8	99956411	99956791
chr8	101162176	101162540
chr8	101348388	101348752
chr8	117778518	117778882
chr8	119123930	119124294
chr8	120885739	120886103
chr8	124054535	124054899
chr8	124084620	124084984
chr8	124780599	124780963
chr8	126441903	126442283
chr8	128746296	128746660
chr8	131456844	131457224
chr8	143808401	143808781
chr8	144512827	144513191
chr8	145728656	145728892
chr9	1050099	1050479
chr9	5628732	5629112
chr9	5832952	5833332
chr9	6008373	6008753
chr9	6645634	6646014
chr9	15552834	15553198
chr9	20622431	20622811
chr9	21802568	21802688
chr9	22446488	22446852
chr9	23826352	23826547
chr9	26892575	26892955
chr9	33001590	33001764
chr9	33749406	33749786
chr9	34637661	34638025
chr9	35116118	35116498
chr9	35488572	35488952
chr9	35603948	35604312
chr9	36036706	36037086
chr9	37120232	37120612
chr9	37422034	37422414
chr9	37752592	37752956
chr9	38424302	38424682
chr9	72374779	72375159
chr9	74920143	74920326
chr9	77567652	77568032
chr9	77643241	77643605
chr9	88742351	88742528
chr9	88897302	88897666
chr9	90340797	90341161
chr9	91361219	91361583
chr9	92219670	92220050
chr9	100459452	100459832
chr9	100684737	100685101
chr9	100818789	100819153
chr9	101018271	101018433
chr9	101867124	101867504
chr9	101984033	101984413
chr9	102583895	102584259
chr9	102861212	102861576
chr9	110044984	110045364
chr9	111882250	111882614
chr9	114557235	114557346
chr9	114658900	114659280
chr9	115142022	115142402
chr9	116163506	116163886
chr9	123605203	123605567
chr9	123964058	123964438
chr9	125667580	125667944
chr9	126773643	126774023
chr9	127533458	127533838
chr9	127703415	127703779
chr9	128508272	128508652
chr9	128508885	128509265
chr9	130374207	130374571
chr9	130497577	130497941
chr9	130541690	130542070
chr9	130564960	130565324
chr9	131038261	131038625
chr9	131592101	131592221
chr9	132815778	132816158
chr9	133454716	133455096
chr9	134000777	134000973
chr9	134164918	134165282
chr9	136202979	136203359
chr9	137533429	137533619
chr9	139011377	139011741
chr9	139981111	139981491
chr9	140117918	140118298
chr9	140196611	140196991
chr9	140353712	140354076
chrX	192859	193011
chrX	1510913	1511277
chrX	1710250	1710630
chrX	9431057	9431421
chrX	15692936	15693036
chrX	15872894	15873258
chrX	15873093	15873457
chrX	16141405	16141785
chrX	16737374	16737738
chrX	16888359	16888723
chrX	20159882	20160246
chrX	23761308	23761672
chrX	24483107	24483471
chrX	24711953	24712060
chrX	30671119	30671483
chrX	40943666	40944030
chrX	47863315	47863679
chrX	47931211	47931386
chrX	48397687	48398051
chrX	48769146	48769510
chrX	48858684	48859048
chrX	48900980	48901344
chrX	55026176	55026540
chrX	57021804	57022184
chrX	67867262	67867626
chrX	68048592	68048956
chrX	69509831	69509922
chrX	69664459	69664839
chrX	73072464	73072844
chrX	73834342	73834706
chrX	77041574	77041938
chrX	78200581	78200961
chrX	95939413	95939793
chrX	100306956	100307336
chrX	103410779	103411159
chrX	106871439	106871803
chrX	107682703	107683067
chrX	117957531	117957911
chrX	118986945	118987309
chrX	119005566	119005946
chrX	119737651	119738031
chrX	119764031	119764122
chrX	123094039	123094403
chrX	129299622	129299986
chrX	129304792	129305172
chrX	129535305	129535685
chrX	130964504	130964868
chrX	150564774	150565154
chrX	153029301	153029681
chrX	153192162	153192542
chrX	153626329	153626709
chrX	153719049	153719413
chrX	153990674	153990773
chrX	154033599	154033963
chr10	1102104	1102468
chr10	1779578	1779958
chr10	5726375	5726755
chr10	8095327	8095707
chr10	12085031	12085411
chr10	16859407	16859771
chr10	18948137	18948517
chr10	22292490	22292854
chr10	30722729	30723109
chr10	32345196	32345576
chr10	32667537	32667901
chr10	38299318	38299698
chr10	38691638	38692018
chr10	60027659	60028039
chr10	70847580	70847960
chr10	71906433	71906568
chr10	72238316	72238696
chr10	80828499	80828879
chr10	81107000	81107380
chr10	85899123	85899283
chr10	90611470	90611834
chr10	92922382	92922762
chr10	93392887	93392982
chr10	94449491	94449871
chr10	95256095	95256459
chr10	96161849	96162213
chr10	98031160	98031540
chr10	98273565	98273945
chr10	98346651	98347031
chr10	99343770	99344134
chr10	99446907	99447271
chr10	103578257	103578637
chr10	104221025	104221163
chr10	104262636	104263016
chr10	104953858	104954238
chr10	105127279	105127659
chr10	112064747	112065111
chr10	112326949	112327313
chr10	112678947	112679311
chr10	119134888	119135252
chr10	120101802	120101906
chr10	120514655	120515035
chr10	121356501	121356865
chr10	123357898	123358278
chr10	124907359	124907739
chr10	128110377	128110741
chr10	133795335	133795715
chr10	134350873	134351237
chr11	47447957	47448321
chr11	313749	314129
chr11	450026	450406
chr11	575983	576363
chr11	747203	747567
chr11	2906969	2907349
chr11	3876148	3876512
chr11	4115746	4116110
chr11	8615685	8616065
chr11	9336082	9336462
chr11	9336289	9336669
chr11	12131830	12132194
chr11	18034522	18034902
chr11	18655976	18656098
chr11	19263140	19263520
chr11	27384551	27384915
chr11	32605082	32605446
chr11	33037160	33037524
chr11	34126947	34127311
chr11	34379955	34380319
chr11	44586722	44587102
chr11	45939451	45939815
chr11	45940382	45940482
chr11	47198382	47198687
chr11	47235768	47236132
chr11	47663933	47664297
chr11	57298316	57298680
chr11	58345507	58345871
chr11	58825869	58826233
chr11	59436504	59436884
chr11	60674108	60674472
chr11	60720041	60720421
chr11	60929716	60930080
chr11	61735113	61735204
chr11	62341435	62341799
chr11	62623471	62623851
chr11	63448136	63448516
chr11	63580634	63581014
chr11	63706044	63706408
chr11	64007418	64007798
chr11	64072467	64072847
chr11	65029138	65029518
chr11	65625788	65625941
chr11	65626837	65627201
chr11	65627816	65628180
chr11	65657818	65658182
chr11	66206474	66206838
chr11	67273504	67273868
chr11	72853415	72853795
chr11	73881926	73882290
chr11	74699710	74700090
chr11	75236894	75237274
chr11	82611348	82611728
chr11	85397193	85397573
chr11	85780870	85781234
chr11	86666340	86666704
chr11	86748732	86749096
chr11	88071672	88071866
chr11	93394555	93394935
chr11	94226956	94227200
chr11	94822125	94822505
chr11	102217565	102217945
chr11	102962784	102963164
chr11	111472839	111473219
chr11	111742251	111742631
chr11	112096808	112097172
chr11	113746298	113746678
chr11	116658789	116659169
chr11	117049291	117049655
chr11	118972718	118973098
chr11	119252253	119252617
chr11	124609558	124609938
chr11	124823799	124824179
chr11	124981668	124981819
chr11	134201659	134202039
chr12	2903929	2904309
chr12	3982407	3982787
chr12	6832912	6833276
chr12	7055481	7055861
chr12	7079813	7080177
chr12	10766384	10766748
chr12	12509893	12510273
chr12	12715505	12715885
chr12	12870031	12870411
chr12	12878531	12878754
chr12	13043452	13043816
chr12	14518302	14518666
chr12	25151130	25151510
chr12	26986013	26986377
chr12	32111429	32111809
chr12	32831964	32832344
chr12	39299595	39299975
chr12	41085963	41086343
chr12	46384422	46384786
chr12	46663687	46664067
chr12	49463679	49464043
chr12	49525110	49525490
chr12	49715704	49716084
chr12	49715915	49716295
chr12	50222122	50222486
chr12	50560968	50561348
chr12	51318516	51318880
chr12	51441948	51442135
chr12	53399812	53400176
chr12	54348447	54348811
chr12	54410417	54410781
chr12	55413559	55413939
chr12	56321601	56321965
chr12	56497887	56498267
chr12	56511687	56512051
chr12	57940890	57941254
chr12	57984724	57985104
chr12	58240680	58241044
chr12	58329816	58330196
chr12	59314166	59314530
chr12	62860356	62860720
chr12	64237324	64237688
chr12	64237532	64237896
chr12	65563046	65563410
chr12	66696089	66696469
chr12	69201688	69202068
chr12	75905528	75905628
chr12	80329243	80329623
chr12	85430029	85430169
chr12	90102437	90102817
chr12	94853560	94853940
chr12	95866883	95867247
chr12	99038635	99038999
chr12	100582677	100583057
chr12	100967271	100967463
chr12	102455720	102456100
chr12	102513861	102513956
chr12	107349326	107349706
chr12	108154821	108155201
chr12	109027553	109027933
chr12	109125229	109125593
chr12	110151347	110151711
chr12	110505412	110505776
chr12	110718838	110719202
chr12	110842177	110842541
chr12	110939877	110940070
chr12	111843300	111843664
chr12	112204481	112204861
chr12	115121850	115122214
chr12	118810699	118811079
chr12	120875611	120875975
chr12	122064174	122064554
chr12	122231747	122232111
chr12	122516387	122516751
chr12	122985468	122985832
chr12	123458976	123459356
chr12	123920906	123921270
chr12	132628733	132629113
chr12	133706930	133707294
chr13	24553642	24554022
chr13	25497321	25497701
chr13	25861491	25861871
chr13	25875504	25875884
chr13	30169920	30170033
chr13	31191657	31192037
chr13	32420631	32421011
chr13	33113299	33113679
chr13	39260910	39261290
chr13	42845719	42846083
chr13	45563479	45563843
chr13	46038725	46039105
chr13	46275724	46276104
chr13	48611576	48611956
chr13	50018148	50018318
chr13	50265472	50265836
chr13	50367088	50367452
chr13	50510566	50510946
chr13	67804470	67804627
chr13	73355969	73356333
chr13	78271438	78271818
chr13	80915331	80915695
chr13	91999619	91999999
chr13	96296840	96297220
chr13	96705579	96705959
chr13	100741070	100741450
chr13	103248448	103248812
chr13	114897928	114898308
chr13	115000077	115000457
chr13	115046515	115046895
chr13	115079704	115080068
chr14	21945229	21945430
chr14	23058428	23058808
chr14	23340727	23341107
chr14	24105344	24105724
chr14	24563164	24563528
chr14	24615795	24616175
chr14	24616486	24616674
chr14	24711813	24712010
chr14	24912029	24912130
chr14	32545773	32546153
chr14	34931335	34931715
chr14	35451990	35452370
chr14	36003111	36003475
chr14	36538741	36539121
chr14	39639318	39639698
chr14	39901456	39901836
chr14	45381829	45382193
chr14	45382031	45382395
chr14	45722320	45722684
chr14	50358942	50359322
chr14	50778777	50779157
chr14	52535651	52536015
chr14	54976265	54976629
chr14	55369520	55369657
chr14	55493766	55494146
chr14	55658965	55659345
chr14	55737873	55738253
chr14	58710419	58710783
chr14	58711482	58711593
chr14	60558415	60558779
chr14	61116135	61116344
chr14	61190888	61191252
chr14	62228787	62229167
chr14	64931419	64931799
chr14	64931944	64932324
chr14	65007047	65007411
chr14	68086231	68086595
chr14	71276258	71276426
chr14	71276485	71276644
chr14	74034032	74034396
chr14	75389820	75390200
chr14	75643460	75643840
chr14	75745327	75745707
chr14	76447756	76448136
chr14	77494842	77495222
chr14	77923894	77924258
chr14	81687572	81687936
chr14	82089278	82089658
chr14	87371177	87371557
chr14	91976697	91977077
chr14	93214908	93215272
chr14	93260304	93260668
chr14	93673231	93673611
chr14	95876609	95876989
chr14	100772706	100773070
chr14	102783589	102783953
chr14	102975988	102976352
chr14	102976637	102977017
chr14	103523767	103524147
chr14	104394539	104394903
chr14	105218741	105219105
chr14	105444757	105444849
chr15	25684093	25684473
chr15	31522984	31523364
chr15	40401080	40401252
chr15	40650187	40650567
chr15	40857214	40857355
chr15	40857325	40857689
chr15	41055306	41055686
chr15	41056125	41056301
chr15	41186375	41186755
chr15	41624761	41625125
chr15	41694527	41694907
chr15	42066327	42066691
chr15	42867429	42867793
chr15	43425456	43425836
chr15	44116808	44117172
chr15	44718995	44719359
chr15	45879213	45879593
chr15	49912905	49913285
chr15	52311160	52311540
chr15	56286204	56286568
chr15	56536418	56536798
chr15	59063176	59063540
chr15	59664900	59665264
chr15	59981661	59981772
chr15	63481434	63481798
chr15	64648221	64648585
chr15	65426089	65426453
chr15	65477666	65478046
chr15	65579047	65579427
chr15	65809874	65810254
chr15	65903482	65903862
chr15	66993326	66993706
chr15	66994423	66994787
chr15	72490103	72490467
chr15	72523688	72523890
chr15	75230269	75230649
chr15	75748098	75748278
chr15	81290621	81290915
chr15	81293092	81293456
chr15	83419066	83419430
chr15	85259502	85259866
chr15	89877962	89878326
chr15	90645551	90645931
chr15	90931030	90931394
chr15	93198888	93199268
chr15	93443359	93443739
chr15	99550844	99551208
chr15	99645015	99645379
chr15	100105377	100105757
chr15	100882114	100882494
chr15	101792074	101792438
chr15	101817603	101817967
chr16	734265	734476
chr16	2198362	2198742
chr16	2254935	2255315
chr16	2273201	2273581
chr16	2581937	2582317
chr16	2723419	2723783
chr16	2932842	2933206
chr16	2961641	2962021
chr16	3030313	3030693
chr16	4303721	4304101
chr16	4303921	4304301
chr16	4674498	4674878
chr16	11762004	11762384
chr16	11836489	11836853
chr16	11837415	11837795
chr16	20774808	20775172
chr16	21513709	21514089
chr16	23652476	23652856
chr16	23689969	23690333
chr16	23846730	23847110
chr16	24550661	24551041
chr16	28223233	28223613
chr16	28505354	28505734
chr16	28857637	28858001
chr16	29816945	29817325
chr16	29822640	29823004
chr16	30007236	30007616
chr16	31128603	31128967
chr16	50403842	50404222
chr16	50775630	50775758
chr16	53737767	53738131
chr16	57125252	57125616
chr16	67217680	67218044
chr16	67282705	67283085
chr16	67694446	67694810
chr16	67840339	67840703
chr16	67926843	67927223
chr16	68118316	68118696
chr16	68119066	68119446
chr16	68482369	68482749
chr16	68770954	68771334
chr16	69220459	69220839
chr16	71323486	71323866
chr16	71842767	71843147
chr16	74808604	74808984
chr16	75467759	75468139
chr16	75590034	75590414
chr16	75598915	75599295
chr16	78133037	78133401
chr16	81478186	81478550
chr16	84853354	84853734
chr16	85932541	85932806
chr16	86600139	86600503
chr16	87245032	87245396
chr16	87526614	87526819
chr16	89237865	89238245
chr16	89626944	89627064
chr16	89768368	89768748
chr16	89984243	89984623
chr17	36831018	36831398
chr17	1419844	1420208
chr17	1532140	1532323
chr17	1613521	1613885
chr17	1957080	1957460
chr17	2304794	2305158
chr17	3462094	3462474
chr17	3539521	3539885
chr17	4981602	4981709
chr17	5095044	5095424
chr17	5487751	5488131
chr17	7184777	7185157
chr17	7197922	7198302
chr17	7233387	7233533
chr17	7338565	7338929
chr17	7387353	7387733
chr17	7464969	7465349
chr17	7819026	7819390
chr17	7835384	7835493
chr17	7990991	7991355
chr17	11900674	11901054
chr17	16472387	16472767
chr17	20946363	20946743
chr17	20946566	20946946
chr17	26684466	26684846
chr17	26898605	26898985
chr17	27278564	27278928
chr17	27279334	27279698
chr17	27894828	27895208
chr17	29151640	29152020
chr17	29158657	29159037
chr17	30468927	30469291
chr17	33288314	33288694
chr17	33760101	33760481
chr17	34207253	34207633
chr17	34948073	34948453
chr17	35293816	35294196
chr17	36507498	36507862
chr17	36956194	36956558
chr17	39844838	39845202
chr17	40730623	40731003
chr17	41561057	41561421
chr17	42385658	42386038
chr17	42733395	42733775
chr17	43045622	43046002
chr17	44895906	44896286
chr17	45908829	45909209
chr17	45918579	45918759
chr17	46805944	46806308
chr17	47308017	47308381
chr17	49198196	49198576
chr17	49337269	49337649
chr17	53342091	53342471
chr17	53828164	53828544
chr17	56084873	56085253
chr17	56358871	56359251
chr17	56494818	56495198
chr17	57184202	57184582
chr17	58469713	58469817
chr17	59476913	59477277
chr17	61920165	61920545
chr17	62340577	62340957
chr17	62502851	62503215
chr17	63096698	63097062
chr17	63133270	63133634
chr17	68165432	68165812
chr17	70026364	70026744
chr17	70116912	70117276
chr17	73521447	73521827
chr17	74379453	74379833
chr17	76975908	76976272
chr17	77751647	77752027
chr17	79519879	79520243
chr17	79679100	79679480
chr17	79869332	79869712
chr17	80171208	80171572
chr17	80674265	80674645
chr18	158167	158531
chr18	812760	813140
chr18	3247203	3247583
chr18	11149430	11149810
chr18	12377494	12377874
chr18	19284662	19285042
chr18	21718679	21719059
chr18	29265299	29265679
chr18	29265499	29265879
chr18	29522905	29523285
chr18	43547220	43547396
chr18	48724586	48724950
chr18	54305808	54306172
chr18	55711173	55711553
chr18	56806502	56806882
chr18	57026347	57026727
chr18	58039953	58040333
chr18	60190015	60190379
chr18	61089613	61089977
chr18	67873151	67873515
chr18	68051853	68052217
chr18	72163198	72163562
chr18	76829149	76829529
chr19	507180	507544
chr19	983622	984002
chr19	1174195	1174575
chr19	1275290	1275654
chr19	1354818	1354963
chr19	1383080	1383460
chr19	1407259	1407639
chr19	1490338	1490702
chr19	1592800	1593164
chr19	1863573	1863953
chr19	2096681	2097061
chr19	3500825	3501189
chr19	3700355	3700735
chr19	4007594	4007722
chr19	4457753	4458117
chr19	6372415	6372858
chr19	7939472	7939852
chr19	10399322	10399686
chr19	10946750	10947130
chr19	11909179	11909432
chr19	11998390	11998770
chr19	12075669	12075899
chr19	12163739	12163911
chr19	12175430	12175541
chr19	12267496	12267699
chr19	12777416	12777796
chr19	12902056	12902420
chr19	12946080	12946460
chr19	13227588	13227968
chr19	13947635	13948015
chr19	14201857	14202237
chr19	14629187	14629551
chr19	15344098	15344478
chr19	15751546	15751714
chr19	16222457	16222823
chr19	16435386	16435766
chr19	17516349	17516575
chr19	17666159	17666523
chr19	18682232	18682596
chr19	19887315	19887695
chr19	21512057	21512421
chr19	23299585	23299965
chr19	23457026	23457168
chr19	34663090	34663470
chr19	35739374	35739754
chr19	35819747	35820127
chr19	36203378	36203758
chr19	37407079	37407459
chr19	37825283	37825663
chr19	38806636	38807000
chr19	39109519	39109899
chr19	39900643	39901023
chr19	39926502	39926882
chr19	40791417	40791797
chr19	40971700	40972064
chr19	41196564	41196928
chr19	41903280	41903660
chr19	42007025	42007405
chr19	42380998	42381378
chr19	42498243	42498623
chr19	42747302	42747682
chr19	42787891	42788271
chr19	44036866	44037246
chr19	44037084	44037464
chr19	44079713	44080077
chr19	44259634	44259998
chr19	45504410	45504790
chr19	45681438	45681625
chr19	46296154	46296518
chr19	46389610	46389990
chr19	46406321	46406701
chr19	46849937	46850317
chr19	47852386	47852572
chr19	48948354	48948718
chr19	48948921	48949285
chr19	49250002	49250382
chr19	49866693	49867057
chr19	50143530	50143894
chr19	50320653	50321017
chr19	50934859	50935223
chr19	51014379	51014759
chr19	51320604	51320984
chr19	51876046	51876426
chr19	54024127	54024491
chr19	55628995	55629375
chr19	55896739	55896897
chr19	56651925	56652289
chr19	57751665	57752045
chr19	57791565	57791945
chr19	57831618	57831982
chr19	57874533	57874913
chr19	58011030	58011410
chr19	58038512	58038892
chr19	58095222	58095602
chr19	58111181	58111292
chr19	58238864	58239244
chr19	58400302	58400682
chr19	58446638	58447018
chr19	58458948	58459328
chr19	58951663	58951857
chr19	58987188	58987552
chr20	3154146	3154510
chr20	3389294	3389674
chr20	5485041	5485421
chr20	5591560	5591924
chr20	10415016	10415380
chr20	13975915	13976279
chr20	25371298	25371678
chr20	26189969	26190333
chr20	31331669	31332049
chr20	34042709	34043089
chr20	35579963	35580343
chr20	35725129	35725509
chr20	37376699	37377079
chr20	39657146	39657510
chr20	43150578	43150958
chr20	43588925	43589305
chr20	47804834	47805214
chr20	48599170	48599550
chr20	48788983	48789080
chr20	57617799	57618179
chr20	60640894	60641274
chr20	60697236	60697600
chr20	60795137	60795517
chr20	62169029	62169409
chr21	15755513	15755877
chr21	30448982	30449346
chr21	32931694	32931879
chr21	38640097	38640461
chr21	43482758	43483138
chr21	45553268	45553648
chr22	19109791	19110171
chr22	19419331	19419711
chr22	20118584	20118964
chr22	21271445	21271809
chr22	22221866	22222246
chr22	22222077	22222457
chr22	22874501	22874865
chr22	24093124	24093504
chr22	24407670	24407765
chr22	30685492	30685856
chr22	30722775	30723139
chr22	31795319	31795699
chr22	34316922	34317302
chr22	36044228	36044608
chr22	36877875	36878239
chr22	36903064	36903265
chr22	36925156	36925520
chr22	37640950	37641330
chr22	38092610	38092974
chr22	39928785	39929149
chr22	41215319	41215683
chr22	41487526	41487906
chr22	41593368	41593748
chr22	41682145	41682525
chr22	41985889	41986269
chr22	42196394	42196758
chr22	42347892	42348272
chr22	42466761	42467141
chr22	46546042	46546422
chr22	50913324	50913704
