# Supplementary material for: NF-Y Binding Site Architecture Defines a C-Fos Targeted Promoter Class
Source: PLoS One. 2016 Aug 12;11(8):e0160803. doi: 10.1371/journal.pone.0160803 (PMC4982600; doi:10.1371/journal.pone.0160803)
Supplement: S4 File — (BED) [file pone.0160803.s016.bed]

track name="E_FOS_only" description="FOS only of union comparison" visibility=3 url=
chr1	16121603	16121859
chr1	52035513	52035733
chr1	235012069	235012339
chr1	999618	999888
chr1	1143408	1143678
chr1	1828623	1828893
chr1	3529989	3530259
chr1	8064895	8065165
chr1	8107835	8108091
chr1	8137353	8137609
chr1	8156750	8157006
chr1	8157556	8157812
chr1	8181465	8181721
chr1	8182221	8182491
chr1	8257841	8258097
chr1	8271999	8272255
chr1	8940162	8940418
chr1	8959997	8960267
chr1	9224066	9224336
chr1	9240307	9240563
chr1	9254148	9254404
chr1	9335594	9335864
chr1	10519208	10519464
chr1	10891102	10891358
chr1	12100642	12100912
chr1	12221939	12222195
chr1	12588664	12588934
chr1	12610003	12610259
chr1	14672702	14672972
chr1	14763631	14763719
chr1	14770030	14770300
chr1	15759471	15759727
chr1	16007192	16007448
chr1	16125577	16125833
chr1	16126673	16126929
chr1	16339763	16340033
chr1	16402593	16402849
chr1	16490722	16490978
chr1	16499706	16499976
chr1	16500080	16500336
chr1	16508354	16508610
chr1	17004622	17004892
chr1	17454917	17455173
chr1	17802288	17802544
chr1	17820701	17820957
chr1	18857506	18857776
chr1	18945092	18945348
chr1	19329927	19330197
chr1	20187618	20187874
chr1	20193328	20193584
chr1	20451021	20451291
chr1	22269522	22269792
chr1	22283376	22283632
chr1	22345617	22345887
chr1	23496506	23496776
chr1	23515417	23515673
chr1	23541248	23541504
chr1	23912143	23912399
chr1	24058924	24059194
chr1	24243046	24243316
chr1	24373675	24373931
chr1	24476395	24476651
chr1	24518449	24518705
chr1	24592897	24593153
chr1	24610376	24610632
chr1	24620869	24621125
chr1	25010224	25010480
chr1	25293219	25293489
chr1	25348012	25348282
chr1	25349355	25349625
chr1	25580438	25580694
chr1	25865002	25865258
chr1	25895456	25895712
chr1	26396990	26397058
chr1	26704523	26704779
chr1	26713947	26714203
chr1	27126395	27126665
chr1	27234101	27234357
chr1	27317109	27317365
chr1	27400789	27400967
chr1	27519297	27519567
chr1	28439297	28439567
chr1	28471079	28471335
chr1	28640567	28640823
chr1	28672762	28673018
chr1	28678871	28679141
chr1	28827583	28827839
chr1	29211484	29211740
chr1	30042879	30043135
chr1	30664025	30664281
chr1	31200710	31200980
chr1	31296920	31297176
chr1	31391870	31392140
chr1	31944412	31944668
chr1	31956265	31956535
chr1	32039574	32039830
chr1	32292781	32293051
chr1	33454929	33455185
chr1	33515803	33516059
chr1	33685543	33685799
chr1	33899452	33899708
chr1	37624796	37625066
chr1	38530023	38530293
chr1	38999702	38999833
chr1	40142642	40142898
chr1	40504922	40505192
chr1	41332123	41332379
chr1	41334008	41334264
chr1	41341473	41341729
chr1	41807825	41808081
chr1	41898419	41898675
chr1	41951401	41951657
chr1	41958813	41959069
chr1	41961949	41962205
chr1	43760111	43760367
chr1	43795928	43796198
chr1	43988875	43989131
chr1	44509957	44510227
chr1	44513995	44514265
chr1	44514479	44514735
chr1	44620921	44621177
chr1	45196914	45197184
chr1	45732046	45732302
chr1	46219160	46219430
chr1	46624219	46624489
chr1	46986261	46986517
chr1	46993620	46993890
chr1	47647704	47647974
chr1	48194106	48194376
chr1	48483406	48483662
chr1	48492026	48492282
chr1	51986072	51986342
chr1	52006987	52007257
chr1	52024039	52024295
chr1	53040304	53040574
chr1	53128383	53128639
chr1	53140500	53140770
chr1	54873993	54874249
chr1	55437168	55437424
chr1	55742937	55743207
chr1	55887068	55887324
chr1	55894734	55894990
chr1	55909255	55909511
chr1	56184606	56184862
chr1	56219671	56219927
chr1	56247586	56247842
chr1	56278102	56278358
chr1	56293095	56293351
chr1	56530546	56530802
chr1	56603912	56604168
chr1	56922524	56922780
chr1	59050284	59050540
chr1	59193100	59193356
chr1	59219791	59220047
chr1	59221295	59221551
chr1	59395438	59395694
chr1	61952518	61952774
chr1	61970559	61970815
chr1	62696458	62696714
chr1	62787293	62787357
chr1	62822157	62822413
chr1	62890246	62890502
chr1	64128550	64128806
chr1	65726629	65726899
chr1	66902271	66902527
chr1	66987563	66987672
chr1	67526516	67526772
chr1	67628722	67628992
chr1	68036169	68036439
chr1	68148276	68148546
chr1	68149069	68149325
chr1	68166455	68166711
chr1	68735378	68735634
chr1	68850116	68850372
chr1	68919026	68919282
chr1	70970102	70970372
chr1	70975705	70975961
chr1	78227787	78228043
chr1	79545563	79545819
chr1	79594485	79594741
chr1	79654156	79654412
chr1	79664677	79664788
chr1	79789076	79789233
chr1	80858258	80858514
chr1	81640493	81640749
chr1	81645115	81645211
chr1	81769934	81770190
chr1	81791156	81791412
chr1	84893272	84893528
chr1	85164414	85164670
chr1	85763666	85763922
chr1	85779705	85779961
chr1	87239331	87239587
chr1	87311970	87312226
chr1	88261088	88261235
chr1	88271703	88271959
chr1	88421840	88422096
chr1	88793504	88793573
chr1	88837152	88837408
chr1	88954033	88954289
chr1	90186986	90187242
chr1	90411487	90411743
chr1	90441225	90441495
chr1	90868736	90868992
chr1	92075176	92075432
chr1	94441948	94442218
chr1	94765845	94766101
chr1	94791185	94791441
chr1	95045429	95045685
chr1	95119664	95119920
chr1	98403542	98403798
chr1	98552424	98552551
chr1	98789493	98789749
chr1	99636178	99636434
chr1	99923173	99923429
chr1	100065287	100065557
chr1	100813059	100813174
chr1	101836814	101837070
chr1	103656969	103657225
chr1	106765094	106765350
chr1	108559138	108559394
chr1	110179029	110179285
chr1	110195117	110195373
chr1	110196065	110196321
chr1	110330190	110330446
chr1	110363900	110364156
chr1	110381427	110381683
chr1	110414934	110415190
chr1	110438470	110438740
chr1	110899066	110899322
chr1	110963894	110964150
chr1	111019892	111019987
chr1	111459541	111459797
chr1	112135424	112135694
chr1	112794426	112794682
chr1	112936797	112937053
chr1	113361709	113361979
chr1	113412037	113412293
chr1	113684389	113684659
chr1	113867685	113867941
chr1	115060022	115060278
chr1	115097283	115097539
chr1	115711492	115711626
chr1	115722174	115722430
chr1	115783015	115783271
chr1	115954460	115954551
chr1	115979891	115980147
chr1	116038337	116038593
chr1	116039811	116040067
chr1	116088429	116088685
chr1	116652298	116652554
chr1	116833007	116833263
chr1	117013909	117014179
chr1	117029153	117029409
chr1	117047007	117047263
chr1	117051495	117051751
chr1	117396309	117396565
chr1	118116318	118116588
chr1	118364435	118364691
chr1	118369125	118369381
chr1	118400147	118400403
chr1	119822080	119822336
chr1	120216722	120216978
chr1	120402236	120402506
chr1	121225847	121226103
chr1	144013455	144013711
chr1	147010913	147011169
chr1	147189232	147189488
chr1	149294546	149294816
chr1	149680113	149680383
chr1	149910967	149911223
chr1	150577317	150577469
chr1	150586058	150586314
chr1	150949838	150950094
chr1	151467356	151467612
chr1	151558176	151558432
chr1	151569016	151569286
chr1	151579013	151579269
chr1	151580826	151581082
chr1	151918277	151918533
chr1	151945496	151945752
chr1	152140364	152140620
chr1	153031808	153032078
chr1	153506270	153506526
chr1	153569648	153569904
chr1	153669680	153669936
chr1	153681118	153681374
chr1	154285523	154285793
chr1	155862601	155862857
chr1	155960931	155961187
chr1	156629979	156630249
chr1	156631170	156631440
chr1	156683132	156683388
chr1	157282159	157282429
chr1	158116076	158116332
chr1	158789535	158789603
chr1	159251957	159252213
chr1	159462827	159463083
chr1	161003617	161003873
chr1	161397823	161398093
chr1	161472906	161473176
chr1	161713995	161714265
chr1	162025012	162025268
chr1	162600501	162600757
chr1	162957712	162957968
chr1	163005555	163005811
chr1	166699591	166699861
chr1	166879724	166879980
chr1	167105555	167105811
chr1	167531017	167531287
chr1	167683860	167684130
chr1	167684610	167684880
chr1	167766428	167766684
chr1	168290281	168290537
chr1	168343163	168343433
chr1	168361331	168361587
chr1	168368315	168368571
chr1	168438974	168439230
chr1	168592418	168592674
chr1	168721478	168721546
chr1	168752038	168752294
chr1	168770634	168770890
chr1	168830909	168831165
chr1	169071841	169072097
chr1	170532212	170532468
chr1	171786949	171787069
chr1	172468837	172469107
chr1	172807532	172807788
chr1	172872751	172873007
chr1	172887220	172887294
chr1	172903107	172903304
chr1	172921737	172921993
chr1	173031343	173031599
chr1	173991518	173991788
chr1	174122745	174123001
chr1	174965673	174965943
chr1	175809469	175809725
chr1	175814605	175814861
chr1	176210563	176210819
chr1	178499292	178499397
chr1	178505980	178506236
chr1	178578132	178578388
chr1	178653949	178654205
chr1	178987076	178987332
chr1	179787841	179788111
chr1	179895656	179895912
chr1	179900157	179900413
chr1	180120746	180121002
chr1	180477085	180477341
chr1	180496528	180496798
chr1	180541212	180541482
chr1	181069725	181069995
chr1	181081647	181081903
chr1	181121008	181121278
chr1	181122145	181122415
chr1	181220256	181220512
chr1	182076343	182076599
chr1	182150303	182150559
chr1	182155516	182155772
chr1	182931755	182932011
chr1	183132529	183132785
chr1	183133551	183133807
chr1	184986505	184986761
chr1	185408876	185409132
chr1	185613774	185614030
chr1	185615455	185615711
chr1	186612811	186613067
chr1	186685034	186685290
chr1	186732421	186732677
chr1	186970758	186971014
chr1	187073187	187073443
chr1	187172453	187172709
chr1	187440818	187441074
chr1	187460610	187460866
chr1	187660676	187660932
chr1	187996750	187997006
chr1	188640045	188640301
chr1	188676003	188676211
chr1	188857641	188857897
chr1	188873400	188873656
chr1	189588861	189589117
chr1	189991936	189992192
chr1	190036699	190036955
chr1	192446148	192446404
chr1	192454944	192455200
chr1	192735452	192735708
chr1	192775082	192775352
chr1	193084809	193085065
chr1	193291458	193291714
chr1	193643781	193644037
chr1	193646364	193646620
chr1	193670178	193670434
chr1	193674646	193674902
chr1	193676425	193676681
chr1	193698631	193698887
chr1	193699239	193699495
chr1	193940837	193941093
chr1	195633077	195633333
chr1	195735861	195736117
chr1	195868945	195869201
chr1	198082751	198083007
chr1	198090235	198090491
chr1	198124421	198124677
chr1	198412619	198412800
chr1	198529378	198529634
chr1	198593070	198593326
chr1	198940101	198940357
chr1	199241799	199242055
chr1	199459994	199460250
chr1	199654588	199654844
chr1	199711844	199711950
chr1	199728664	199728920
chr1	199828634	199828890
chr1	200149929	200150185
chr1	200305613	200305869
chr1	200348652	200348908
chr1	200385094	200385350
chr1	200452671	200452927
chr1	200504797	200505053
chr1	200609164	200609420
chr1	200677952	200678222
chr1	201235940	201236196
chr1	201430367	201430468
chr1	201431115	201431371
chr1	201520982	201521252
chr1	201547457	201547727
chr1	201554179	201554449
chr1	201562573	201562647
chr1	201572067	201572337
chr1	201865110	201865380
chr1	201992228	201992484
chr1	201998363	201998619
chr1	202033758	202034028
chr1	202046037	202046293
chr1	202075429	202075685
chr1	202558455	202558711
chr1	203482005	203482261
chr1	203488574	203488844
chr1	203506197	203506453
chr1	203513711	203513967
chr1	203527488	203527744
chr1	203559711	203559967
chr1	203576433	203576689
chr1	203876230	203876369
chr1	204386246	204386502
chr1	204386764	204387020
chr1	204475572	204475842
chr1	204476122	204476392
chr1	204677688	204677944
chr1	205253887	205254143
chr1	205263735	205264005
chr1	205267629	205267885
chr1	207180770	207181026
chr1	207378439	207378695
chr1	207396599	207396855
chr1	207406084	207406340
chr1	207414134	207414390
chr1	207417762	207418032
chr1	207483063	207483319
chr1	207484617	207484873
chr1	207970742	207970998
chr1	209212715	209212971
chr1	209269512	209269768
chr1	209341647	209341903
chr1	209392416	209392672
chr1	209433534	209433790
chr1	209439886	209440142
chr1	209440431	209440519
chr1	209562598	209562854
chr1	209921095	209921351
chr1	210050502	210050758
chr1	210058149	210058223
chr1	211552208	211552478
chr1	211688673	211688929
chr1	211748096	211748352
chr1	211765586	211765842
chr1	211786666	211786922
chr1	211809874	211810130
chr1	211812879	211813135
chr1	211821697	211821953
chr1	211909209	211909297
chr1	212085505	212085761
chr1	212091305	212091561
chr1	212408016	212408272
chr1	212658310	212658566
chr1	212659325	212659581
chr1	212686487	212686743
chr1	212732294	212732550
chr1	212810145	212810415
chr1	212894936	212895206
chr1	216630146	216630402
chr1	216637895	216638151
chr1	218633326	218633582
chr1	218654035	218654291
chr1	218666292	218666548
chr1	218670023	218670279
chr1	218758901	218759157
chr1	218834190	218834307
chr1	218951675	218951931
chr1	219691986	219692242
chr1	219833191	219833447
chr1	219873243	219873513
chr1	219875994	219876250
chr1	220510730	220510986
chr1	220600405	220600661
chr1	220605829	220606085
chr1	220684544	220684800
chr1	221163853	221164123
chr1	221209278	221209534
chr1	221565784	221566040
chr1	221589017	221589273
chr1	221589565	221589821
chr1	221602732	221602988
chr1	221612765	221613021
chr1	221613379	221613635
chr1	221651509	221651765
chr1	221661198	221661454
chr1	221840937	221841193
chr1	222000198	222000468
chr1	222013197	222013453
chr1	222029613	222029869
chr1	222042412	222042518
chr1	222060535	222060791
chr1	222135064	222135320
chr1	222161311	222161567
chr1	222461481	222461737
chr1	223205148	223205404
chr1	223209477	223209747
chr1	223575870	223576126
chr1	223963781	223964051
chr1	224267845	224268115
chr1	224521718	224521988
chr1	224716698	224716968
chr1	224730623	224730766
chr1	224958063	224958319
chr1	225642525	225642781
chr1	225843227	225843483
chr1	225845408	225845664
chr1	225888074	225888330
chr1	225924944	225925200
chr1	226298839	226299109
chr1	227584183	227584453
chr1	228579883	228580153
chr1	228640268	228640538
chr1	228966902	228967158
chr1	228974242	228974498
chr1	228978109	228978209
chr1	228997010	228997266
chr1	229038840	229039096
chr1	229160422	229160678
chr1	229230836	229231092
chr1	229356962	229357218
chr1	230443860	230444116
chr1	230595281	230595537
chr1	230960751	230961007
chr1	232674030	232674286
chr1	232674469	232674725
chr1	232840563	232840819
chr1	232903169	232903425
chr1	232972876	232973132
chr1	233679485	233679741
chr1	233809951	233810221
chr1	233843381	233843637
chr1	234005471	234005727
chr1	234700451	234700707
chr1	234795356	234795612
chr1	234820072	234820182
chr1	234836036	234836306
chr1	234881558	234881828
chr1	234908163	234908419
chr1	235002274	235002530
chr1	235029595	235029865
chr1	235061650	235061906
chr1	235093194	235093450
chr1	235116787	235117057
chr1	235133126	235133382
chr1	235695716	235695972
chr1	236066390	236066646
chr1	236073969	236074225
chr1	236080838	236081094
chr1	237068516	237068675
chr1	237176263	237176533
chr1	238822118	238822374
chr1	239410654	239410910
chr1	241646122	241646378
chr1	241805063	241805319
chr1	241970271	241970527
chr1	241984702	241984958
chr1	242001312	242001568
chr1	242153410	242153666
chr1	242156087	242156343
chr1	244327387	244327643
chr1	244437665	244437921
chr1	244466233	244466489
chr1	244486409	244486512
chr1	244903387	244903643
chr1	245126820	245127090
chr1	249123146	249123402
chr1	249221084	249221354
chr2	393758	394014
chr2	567977	568233
chr2	667400	667656
chr2	1604393	1604649
chr2	8144404	8144674
chr2	8685147	8685417
chr2	8731178	8731434
chr2	8802688	8802944
chr2	9252277	9252547
chr2	9795648	9795904
chr2	9839676	9839946
chr2	9843895	9844151
chr2	9892786	9893042
chr2	9903799	9904069
chr2	10423491	10423747
chr2	10425693	10425949
chr2	10438060	10438316
chr2	10637979	10638235
chr2	11076442	11076698
chr2	11970399	11970669
chr2	12133936	12134206
chr2	13068394	13068664
chr2	13105602	13105872
chr2	15870616	15870872
chr2	16052489	16052745
chr2	17304233	17304503
chr2	19172740	19172996
chr2	19273425	19273681
chr2	19340504	19340760
chr2	19738196	19738452
chr2	19740981	19741237
chr2	20001212	20001468
chr2	20225244	20225500
chr2	20227599	20227855
chr2	20266104	20266360
chr2	20386306	20386576
chr2	20630700	20630970
chr2	20695924	20696180
chr2	20761423	20761693
chr2	20779089	20779345
chr2	20784425	20784510
chr2	22060191	22060447
chr2	23600672	23600928
chr2	23604039	23604295
chr2	24679575	24679845
chr2	25432860	25433130
chr2	25923171	25923427
chr2	26143285	26143541
chr2	26235075	26235331
chr2	26235438	26235708
chr2	26241050	26241320
chr2	26958055	26958311
chr2	26980931	26981187
chr2	27750225	27750495
chr2	27943107	27943216
chr2	28668812	28669068
chr2	28872919	28873175
chr2	28934604	28934860
chr2	30497654	30497910
chr2	30887928	30888184
chr2	32037311	32037581
chr2	36842475	36842731
chr2	36877343	36877412
chr2	37330848	37331104
chr2	37789453	37789723
chr2	37903480	37903736
chr2	37916208	37916464
chr2	38008254	38008510
chr2	38030049	38030305
chr2	38443194	38443450
chr2	42087160	42087416
chr2	42155838	42156094
chr2	42158035	42158291
chr2	42193589	42193845
chr2	42221392	42221648
chr2	42345285	42345541
chr2	42360170	42360426
chr2	42648018	42648274
chr2	43037621	43037891
chr2	43140499	43140769
chr2	43237875	43238131
chr2	43269056	43269312
chr2	43278598	43278854
chr2	43302305	43302561
chr2	43313674	43313930
chr2	43358160	43358430
chr2	43406124	43406380
chr2	43408110	43408366
chr2	43449081	43449351
chr2	45186123	45186379
chr2	46918056	46918312
chr2	47100877	47101007
chr2	47581307	47581577
chr2	47581759	47582029
chr2	47582729	47582999
chr2	48334819	48335075
chr2	48512120	48512390
chr2	52146589	52146845
chr2	52667360	52667616
chr2	53161642	53161898
chr2	53580617	53580873
chr2	53631304	53631421
chr2	53704035	53704291
chr2	53786753	53787009
chr2	53844451	53844721
chr2	54301070	54301326
chr2	55283232	55283502
chr2	55336749	55337005
chr2	55338906	55339176
chr2	55343194	55343464
chr2	56006960	56007107
chr2	56069219	56069475
chr2	56089953	56090209
chr2	56219694	56219950
chr2	56968696	56968952
chr2	57408869	57409125
chr2	61847664	61847934
chr2	61886616	61886872
chr2	61935256	61935512
chr2	61986884	61987140
chr2	62805137	62805393
chr2	63926069	63926325
chr2	64018106	64018362
chr2	64587204	64587460
chr2	65034526	65034782
chr2	65058520	65058776
chr2	65180203	65180288
chr2	65202474	65202730
chr2	65804146	65804402
chr2	65822741	65822997
chr2	66046422	66046692
chr2	67267425	67267681
chr2	67517205	67517461
chr2	67517919	67518175
chr2	67538711	67538967
chr2	67788725	67788981
chr2	68144906	68145162
chr2	69076862	69077132
chr2	69145705	69145975
chr2	69481123	69481379
chr2	69902708	69902790
chr2	70336030	70336286
chr2	70363266	70363536
chr2	70369746	70370016
chr2	71002376	71002632
chr2	71970050	71970306
chr2	72012152	72012408
chr2	72108007	72108263
chr2	72177942	72178198
chr2	72342603	72342859
chr2	73055124	73055380
chr2	73091697	73091953
chr2	74967893	74968149
chr2	75520053	75520309
chr2	76496099	76496355
chr2	76497493	76497749
chr2	76501422	76501678
chr2	76538961	76539217
chr2	81885542	81885693
chr2	82099102	82099358
chr2	83220822	83221078
chr2	83330816	83331072
chr2	84178447	84178717
chr2	84198781	84198913
chr2	85147098	85147162
chr2	85173551	85173807
chr2	85185571	85185827
chr2	85186357	85186613
chr2	85726268	85726524
chr2	85929325	85929581
chr2	86019908	86020164
chr2	86162923	86163179
chr2	86620858	86621114
chr2	88565267	88565361
chr2	91786505	91786761
chr2	91786998	91787254
chr2	91954489	91954745
chr2	96812802	96813058
chr2	96814243	96814499
chr2	97093708	97093964
chr2	97197849	97198105
chr2	100982023	100982279
chr2	101204565	101204821
chr2	101369132	101369388
chr2	101374179	101374435
chr2	101383857	101384113
chr2	101402762	101403018
chr2	101817216	101817472
chr2	102682268	102682524
chr2	105796200	105796456
chr2	105851911	105852167
chr2	106071555	106071811
chr2	106127487	106127743
chr2	108250293	108250563
chr2	112383707	112383977
chr2	112456517	112456773
chr2	113382011	113382267
chr2	113398404	113398674
chr2	113424448	113424718
chr2	113463861	113464131
chr2	113694035	113694305
chr2	113770582	113770668
chr2	114576139	114576395
chr2	119455412	119455668
chr2	119496151	119496407
chr2	120145393	120145663
chr2	120514381	120514651
chr2	120995082	120995352
chr2	121055823	121056093
chr2	121487327	121487583
chr2	127984265	127984521
chr2	128155885	128156141
chr2	128158778	128159034
chr2	128165584	128165840
chr2	128288360	128288616
chr2	130998668	130998924
chr2	131566604	131566860
chr2	131582101	131582357
chr2	131586579	131586835
chr2	132426510	132426780
chr2	134575842	134576098
chr2	135575829	135576085
chr2	136993732	136993858
chr2	137005887	137006143
chr2	138817800	138818056
chr2	138829852	138830108
chr2	140634021	140634277
chr2	143630970	143631226
chr2	145115554	145115810
chr2	145353885	145354155
chr2	145417358	145417628
chr2	146138336	146138592
chr2	147391923	147392179
chr2	147907186	147907442
chr2	150394703	150394959
chr2	151024204	151024460
chr2	151477381	151477637
chr2	151478428	151478684
chr2	151734917	151735173
chr2	152159538	152159808
chr2	152252235	152252505
chr2	152616928	152617198
chr2	152624132	152624402
chr2	153057170	153057426
chr2	154023216	154023472
chr2	154211001	154211257
chr2	154265253	154265509
chr2	157257182	157257452
chr2	157759900	157760156
chr2	157893266	157893522
chr2	157909535	157909791
chr2	158030325	158030581
chr2	158038718	158038988
chr2	158755179	158755325
chr2	159580423	159580679
chr2	159581443	159581699
chr2	159750602	159750858
chr2	161062134	161062390
chr2	161071162	161071418
chr2	161076546	161076802
chr2	161080671	161080927
chr2	161083816	161084072
chr2	161098410	161098666
chr2	161522874	161523130
chr2	161887115	161887371
chr2	161979829	161980085
chr2	162847313	162847569
chr2	162948129	162948385
chr2	165245082	165245338
chr2	165753229	165753485
chr2	165911617	165911873
chr2	171013593	171013863
chr2	172128548	172128804
chr2	172963796	172964066
chr2	173118031	173118205
chr2	173417597	173417792
chr2	173557867	173558123
chr2	173562967	173563223
chr2	174517513	174517769
chr2	177447705	177447961
chr2	177796622	177796878
chr2	178033089	178033345
chr2	178037071	178037327
chr2	181521251	181521507
chr2	181971607	181971863
chr2	182068187	182068443
chr2	182656088	182656344
chr2	182675561	182675817
chr2	182741399	182741655
chr2	184733474	184733730
chr2	186448226	186448482
chr2	187440115	187440371
chr2	189494062	189494318
chr2	190074960	190075230
chr2	190151046	190151302
chr2	190258199	190258455
chr2	190371384	190371654
chr2	191199252	191199522
chr2	191269378	191269648
chr2	191472749	191473005
chr2	191501171	191501427
chr2	191624436	191624692
chr2	192458789	192459045
chr2	192512649	192512919
chr2	192731806	192732062
chr2	192743367	192743623
chr2	192792046	192792302
chr2	194711892	194712148
chr2	196206814	196207070
chr2	196276019	196276275
chr2	196351834	196352090
chr2	196425878	196426134
chr2	196440874	196441130
chr2	196478684	196478954
chr2	197466211	197466467
chr2	201165417	201165673
chr2	202223458	202223728
chr2	204676395	204676651
chr2	208123138	208123394
chr2	208176218	208176488
chr2	208195645	208195901
chr2	210248039	210248295
chr2	211820386	211820642
chr2	217529294	217529564
chr2	217639853	217640123
chr2	220138679	220138935
chr2	220577877	220578147
chr2	221090001	221090257
chr2	221093412	221093668
chr2	221484266	221484522
chr2	221484706	221484962
chr2	223621776	223622032
chr2	223639679	223639935
chr2	223906270	223906526
chr2	223924008	223924278
chr2	224325478	224325734
chr2	224353614	224353884
chr2	224413954	224414210
chr2	224428222	224428478
chr2	224441663	224441919
chr2	224564300	224564556
chr2	224590327	224590583
chr2	224951330	224951586
chr2	225011987	225012243
chr2	225225743	225225999
chr2	225965783	225966039
chr2	226135548	226135804
chr2	226979939	226980073
chr2	226983796	226984052
chr2	227340382	227340638
chr2	227343106	227343362
chr2	227526632	227526888
chr2	228331041	228331297
chr2	228520221	228520477
chr2	228682960	228683216
chr2	228727982	228728238
chr2	230590734	230590990
chr2	231549662	231549733
chr2	234130028	234130298
chr2	234156388	234156644
chr2	234259504	234259604
chr2	234260108	234260378
chr2	235330894	235331150
chr2	235748969	235749225
chr2	235789147	235789403
chr2	236239757	236240013
chr2	236303284	236303357
chr2	236352951	236353221
chr2	236369326	236369596
chr2	236377714	236377970
chr2	236394044	236394314
chr2	237551300	237551556
chr2	237569730	237569986
chr2	237626879	237627135
chr2	237933809	237934065
chr2	238087140	238087396
chr2	238110735	238110991
chr2	238374229	238374499
chr2	239505844	239506100
chr2	239552774	239553030
chr2	239593219	239593475
chr2	240387005	240387261
chr2	240552710	240552966
chr2	240680302	240680558
chr2	240866775	240867031
chr2	241327090	241327346
chr2	241373438	241373694
chr2	241505156	241505426
chr2	241519578	241519834
chr3	467816	468072
chr3	1703646	1703902
chr3	1776207	1776463
chr3	5036702	5036972
chr3	5054965	5055221
chr3	5058316	5058572
chr3	5470691	5470897
chr3	5473577	5473847
chr3	5809124	5809216
chr3	8911438	8911694
chr3	9926224	9926480
chr3	11138280	11138536
chr3	12234996	12235252
chr3	12235774	12236030
chr3	12277278	12277534
chr3	12491407	12491677
chr3	12512848	12513104
chr3	12721083	12721339
chr3	12909871	12910141
chr3	13584859	13585115
chr3	14185347	14185603
chr3	14186070	14186326
chr3	14274194	14274464
chr3	14276667	14276923
chr3	14307059	14307315
chr3	14331133	14331403
chr3	15408623	15408893
chr3	16101867	16102123
chr3	16109709	16109965
chr3	16110661	16110917
chr3	16281756	16282012
chr3	16351217	16351285
chr3	16707021	16707277
chr3	18336711	18336967
chr3	19979062	19979332
chr3	20064438	20064708
chr3	20946802	20947072
chr3	23136673	23136929
chr3	23671157	23671413
chr3	23710133	23710389
chr3	23727431	23727513
chr3	23782680	23782936
chr3	24053000	24053256
chr3	24089423	24089679
chr3	24565832	24566088
chr3	24746030	24746286
chr3	27575461	27575717
chr3	29108569	29108825
chr3	29228640	29228896
chr3	30383935	30384081
chr3	30410505	30410761
chr3	30518297	30518553
chr3	30638804	30639060
chr3	30762623	30762879
chr3	31108598	31108854
chr3	31118719	31118975
chr3	31418679	31418935
chr3	32511346	32511602
chr3	33942510	33942780
chr3	33946625	33946895
chr3	33953401	33953671
chr3	33984154	33984275
chr3	34053660	34053807
chr3	36404508	36404636
chr3	36690150	36690406
chr3	36749172	36749428
chr3	36999528	36999687
chr3	37011500	37011770
chr3	37239268	37239524
chr3	37254551	37254807
chr3	37263016	37263272
chr3	38369142	38369398
chr3	39680846	39681102
chr3	42032976	42033232
chr3	42062534	42062790
chr3	42122127	42122383
chr3	42725530	42725786
chr3	43256187	43256443
chr3	43795309	43795565
chr3	43812232	43812488
chr3	44277486	44277742
chr3	45082183	45082453
chr3	45085240	45085496
chr3	45096581	45096851
chr3	45209010	45209266
chr3	45241545	45241801
chr3	45593197	45593453
chr3	45859290	45859546
chr3	46150841	46151097
chr3	46152167	46152423
chr3	46441742	46442012
chr3	46464195	46464465
chr3	48196673	48196929
chr3	49481486	49481742
chr3	49493929	49494185
chr3	50354331	50354587
chr3	50708860	50709116
chr3	52205583	52205839
chr3	52227134	52227390
chr3	52251135	52251391
chr3	52347801	52348071
chr3	53303985	53304241
chr3	55194575	55194831
chr3	55223529	55223785
chr3	55226214	55226470
chr3	55364478	55364734
chr3	55396283	55396539
chr3	55525297	55525553
chr3	56725537	56725793
chr3	57937245	57937501
chr3	57955486	57955742
chr3	57960567	57960823
chr3	57963483	57963739
chr3	57985211	57985467
chr3	57991475	57991731
chr3	58200241	58200497
chr3	58457128	58457384
chr3	59714263	59714533
chr3	65016593	65016863
chr3	65025446	65025716
chr3	69131122	69131378
chr3	69768511	69768781
chr3	70330857	70331113
chr3	70873961	70874217
chr3	70899024	70899280
chr3	71650996	71651252
chr3	72192530	72192800
chr3	72319188	72319458
chr3	72498044	72498314
chr3	72710303	72710559
chr3	78552423	78552679
chr3	78599918	78600174
chr3	79986826	79987082
chr3	84157934	84158190
chr3	87044765	87045021
chr3	87126164	87126420
chr3	87255199	87255455
chr3	87382631	87382887
chr3	87644947	87645203
chr3	87845416	87845686
chr3	93877881	93878137
chr3	94160076	94160332
chr3	94454265	94454521
chr3	94647934	94648031
chr3	95985709	95985965
chr3	98641721	98641977
chr3	100796593	100796849
chr3	101422033	101422289
chr3	101584549	101584805
chr3	101647833	101648089
chr3	101808833	101809089
chr3	101882283	101882539
chr3	102074074	102074330
chr3	102202517	102202773
chr3	102229592	102229848
chr3	102249755	102250011
chr3	102888217	102888473
chr3	102900051	102900307
chr3	104662832	104663088
chr3	104837873	104838129
chr3	105365963	105366219
chr3	105716802	105717058
chr3	106147609	106147679
chr3	106329459	106329715
chr3	106407354	106407610
chr3	106484185	106484441
chr3	107111689	107111945
chr3	109272808	109273064
chr3	109362552	109362695
chr3	109646106	109646362
chr3	109746308	109746564
chr3	110139000	110139256
chr3	110239961	110240231
chr3	110245610	110245866
chr3	110295792	110296048
chr3	110492198	110492454
chr3	111112012	111112268
chr3	112095925	112096181
chr3	112395691	112395947
chr3	112770127	112770383
chr3	112830162	112830418
chr3	113549492	113549748
chr3	114958683	114958939
chr3	114964415	114964517
chr3	115509701	115509900
chr3	115519460	115519536
chr3	118191511	118191767
chr3	118250776	118251032
chr3	118267364	118267620
chr3	119356766	119357036
chr3	119357748	119358018
chr3	119864387	119864643
chr3	120215206	120215462
chr3	120342333	120342589
chr3	120577450	120577706
chr3	124776065	124776321
chr3	124798578	124798834
chr3	125322165	125322421
chr3	125631127	125631383
chr3	126704894	126705164
chr3	127244226	127244482
chr3	127799198	127799468
chr3	128143371	128143627
chr3	128930739	128930995
chr3	128945270	128945526
chr3	128949605	128949861
chr3	128959389	128959645
chr3	130539853	130540109
chr3	133287579	133287835
chr3	133797437	133797693
chr3	134046573	134046829
chr3	134146330	134146586
chr3	138493381	138493637
chr3	138542635	138542891
chr3	138594626	138594896
chr3	138640684	138640940
chr3	139018260	139018516
chr3	139021170	139021426
chr3	139028774	139029030
chr3	139031750	139032006
chr3	139058241	139058511
chr3	141201154	141201410
chr3	141659007	141659263
chr3	142526998	142527268
chr3	142667090	142667360
chr3	142695532	142695788
chr3	142884529	142884799
chr3	142887370	142887640
chr3	143772022	143772278
chr3	145881441	145881697
chr3	147661432	147661688
chr3	147739274	147739530
chr3	147876067	147876323
chr3	148398944	148399200
chr3	148642428	148642684
chr3	148661410	148661666
chr3	149017965	149018221
chr3	149057878	149057983
chr3	149104818	149105074
chr3	149105892	149106036
chr3	150063058	150063314
chr3	150066340	150066596
chr3	150083111	150083381
chr3	150187465	150187721
chr3	150215963	150216044
chr3	150456197	150456467
chr3	151261401	151261657
chr3	151694116	151694372
chr3	151743767	151744023
chr3	151893339	151893595
chr3	151976278	151976534
chr3	152437139	152437395
chr3	152769234	152769490
chr3	152856534	152856790
chr3	152858636	152858892
chr3	152939626	152939896
chr3	156322540	156322810
chr3	156348285	156348541
chr3	156536816	156537072
chr3	156966425	156966695
chr3	157230336	157230606
chr3	157502898	157503154
chr3	157632759	157633029
chr3	158464593	158464863
chr3	158510630	158510900
chr3	160384032	160384288
chr3	160385353	160385501
chr3	160412199	160412455
chr3	160881179	160881435
chr3	161034177	161034433
chr3	161121118	161121374
chr3	162013187	162013443
chr3	162320505	162320761
chr3	162359765	162360021
chr3	162487438	162487694
chr3	162789574	162789830
chr3	163217344	163217459
chr3	163491008	163491264
chr3	163657847	163658103
chr3	165360875	165361131
chr3	165803250	165803506
chr3	166002807	166003063
chr3	166673396	166673652
chr3	167720963	167721219
chr3	168744814	168744898
chr3	169478376	169478632
chr3	170048274	170048365
chr3	170064595	170064851
chr3	170332501	170332757
chr3	170420933	170421203
chr3	170529250	170529506
chr3	171188548	171188818
chr3	171241976	171242246
chr3	171529428	171529684
chr3	171542685	171542941
chr3	171543309	171543565
chr3	171685019	171685289
chr3	172185073	172185329
chr3	172259119	172259375
chr3	172263917	172264173
chr3	172268399	172268655
chr3	172575005	172575261
chr3	176919481	176919737
chr3	177063485	177063741
chr3	177077722	177077978
chr3	177138534	177138790
chr3	177527906	177528162
chr3	177888575	177888831
chr3	181568853	181569109
chr3	181930311	181930567
chr3	183757241	183757497
chr3	183803244	183803500
chr3	184166719	184166892
chr3	184241706	184241962
chr3	184434614	184434870
chr3	185618137	185618393
chr3	186306487	186306743
chr3	186307790	186308046
chr3	186470761	186471017
chr3	186600648	186600918
chr3	186816783	186817039
chr3	186904597	186904853
chr3	187103336	187103592
chr3	187121520	187121776
chr3	187347568	187347824
chr3	187358430	187358686
chr3	187379122	187379378
chr3	187559450	187559706
chr3	187631514	187631770
chr3	187661460	187661716
chr3	187686784	187686908
chr3	187704342	187704612
chr3	187764690	187764946
chr3	187779042	187779298
chr3	188666452	188666708
chr3	188668731	188668987
chr3	189110870	189111126
chr3	189111525	189111781
chr3	189849218	189849474
chr3	189948006	189948262
chr3	189983561	189983817
chr3	190104178	190104434
chr3	191194267	191194523
chr3	191493278	191493534
chr3	193308001	193308257
chr3	193577050	193577306
chr3	193590155	193590411
chr3	193646803	193647073
chr3	193809036	193809292
chr3	193839785	193840041
chr3	193859752	193860008
chr3	193868054	193868310
chr3	194014210	194014466
chr3	194040542	194040798
chr3	194209680	194209936
chr3	194247947	194248203
chr3	194282155	194282411
chr3	194298849	194299105
chr3	194561762	194562018
chr3	194754230	194754486
chr3	195273042	195273298
chr3	195442931	195443201
chr3	195743455	195743711
chr3	195837800	195838056
chr3	196758468	196758576
chr3	197121470	197121740
chr3	197148768	197149024
chr3	197194006	197194262
chr3	197214812	197215068
chr4	604587	604843
chr4	1037459	1037715
chr4	3307420	3307690
chr4	4971120	4971376
chr4	6690754	6691010
chr4	8193221	8193477
chr4	8338292	8338469
chr4	10187504	10187774
chr4	10286710	10286980
chr4	11637130	11637386
chr4	11700608	11700864
chr4	13641894	13642150
chr4	13703632	13703888
chr4	13909020	13909276
chr4	13922645	13922901
chr4	14858120	14858376
chr4	15155242	15155512
chr4	15895599	15895855
chr4	15907736	15907992
chr4	15923039	15923142
chr4	19740700	19740956
chr4	20197059	20197315
chr4	24107380	24107636
chr4	26767235	26767505
chr4	27975389	27975645
chr4	31520361	31520617
chr4	34048248	34048504
chr4	38171146	38171402
chr4	40257328	40257584
chr4	40318879	40319135
chr4	40336056	40336312
chr4	40406748	40407004
chr4	41321647	41321903
chr4	41711925	41712181
chr4	41714455	41714711
chr4	42857858	42858114
chr4	45624064	45624320
chr4	48911713	48911983
chr4	54948379	54948635
chr4	55437423	55437693
chr4	55451818	55452088
chr4	56600088	56600344
chr4	56621037	56621293
chr4	56773222	56773478
chr4	67355819	67356075
chr4	67777659	67777915
chr4	67901238	67901494
chr4	71721340	71721419
chr4	74573670	74573926
chr4	74710122	74710378
chr4	74922587	74922857
chr4	74974846	74975102
chr4	74982772	74983028
chr4	75260613	75260869
chr4	75533810	75534066
chr4	75585068	75585324
chr4	75608014	75608270
chr4	77724624	77724894
chr4	77864388	77864658
chr4	79466455	79466711
chr4	79613119	79613389
chr4	79685891	79686161
chr4	81048565	81048835
chr4	82342734	82342873
chr4	82646297	82646567
chr4	84128926	84129182
chr4	84178050	84178306
chr4	84278432	84278688
chr4	84678289	84678559
chr4	90413955	90414211
chr4	90460625	90460881
chr4	91043573	91043829
chr4	95341205	95341461
chr4	99649681	99649951
chr4	100578976	100579232
chr4	100644799	100645069
chr4	100685005	100685261
chr4	101269704	101269960
chr4	101502516	101502772
chr4	101659574	101659830
chr4	108966144	108966414
chr4	111153066	111153336
chr4	112702867	112703123
chr4	112881353	112881609
chr4	113004432	113004688
chr4	114998891	114999147
chr4	120130301	120130557
chr4	122193750	122194006
chr4	122632776	122633032
chr4	123704515	123704771
chr4	125099152	125099408
chr4	125552946	125553202
chr4	125561260	125561516
chr4	125862550	125862806
chr4	125864355	125864611
chr4	126641265	126641521
chr4	127771497	127771753
chr4	128061528	128061784
chr4	129243512	129243768
chr4	129244235	129244491
chr4	129259816	129260086
chr4	129308238	129308494
chr4	129382442	129382698
chr4	129438911	129439167
chr4	129474006	129474276
chr4	129522552	129522808
chr4	134786824	134787080
chr4	135465450	135465706
chr4	137241388	137241644
chr4	138188215	138188471
chr4	138432030	138432286
chr4	139229582	139229838
chr4	140521237	140521493
chr4	142297136	142297392
chr4	144689414	144689670
chr4	148467570	148467826
chr4	148499262	148499518
chr4	150702411	150702667
chr4	152245943	152246199
chr4	152729390	152729646
chr4	153186313	153186569
chr4	154058372	154058628
chr4	157268626	157268882
chr4	157920344	157920600
chr4	159235977	159236233
chr4	159968648	159968918
chr4	173995755	173996011
chr4	177191881	177192137
chr4	178517269	178517525
chr4	183896954	183897224
chr4	183949121	183949391
chr4	184270147	184270417
chr4	184359907	184360163
chr4	185304717	185304973
chr4	185435516	185435786
chr4	187729820	187730090
chr4	187751032	187751302
chr4	187766296	187766566
chr4	187821711	187821981
chr4	189048644	189048900
chr5	657725	657995
chr5	1003382	1003638
chr5	1171495	1171765
chr5	5335771	5336027
chr5	5340575	5340743
chr5	5350303	5350559
chr5	5605254	5605524
chr5	6159216	6159423
chr5	6427917	6428173
chr5	6437110	6437366
chr5	6766758	6767014
chr5	10018837	10019093
chr5	10310564	10310820
chr5	10319458	10319728
chr5	10479266	10479522
chr5	10507703	10507959
chr5	10914023	10914279
chr5	13350968	13351224
chr5	13378294	13378400
chr5	13477291	13477547
chr5	13537096	13537352
chr5	13606273	13606529
chr5	13985866	13986122
chr5	14033075	14033331
chr5	14036319	14036575
chr5	14105934	14106190
chr5	14580549	14580805
chr5	14901933	14902189
chr5	14915088	14915344
chr5	14958321	14958577
chr5	14959682	14959938
chr5	15008738	15008867
chr5	15009632	15009742
chr5	17025059	17025315
chr5	17118834	17119090
chr5	17128020	17128276
chr5	17302284	17302540
chr5	17304477	17304733
chr5	17305211	17305467
chr5	17306078	17306334
chr5	17315792	17316048
chr5	17343858	17344114
chr5	17375653	17375909
chr5	17406777	17406888
chr5	17413461	17413731
chr5	17619533	17619789
chr5	17680067	17680198
chr5	17797212	17797468
chr5	17860895	17861056
chr5	17910496	17910752
chr5	18220831	18221087
chr5	18553390	18553646
chr5	20276552	20276808
chr5	20679189	20679445
chr5	21152796	21152935
chr5	21219400	21219656
chr5	21432909	21433165
chr5	21650165	21650421
chr5	21680416	21680581
chr5	21685163	21685419
chr5	21685704	21685960
chr5	21689760	21690016
chr5	23631410	23631666
chr5	24246024	24246280
chr5	24271945	24272201
chr5	24401948	24402204
chr5	24789024	24789280
chr5	24823769	24824025
chr5	25006392	25006648
chr5	25484509	25484765
chr5	25516388	25516644
chr5	26495636	26495892
chr5	26553281	26553366
chr5	26572683	26572939
chr5	26601806	26601913
chr5	26737938	26738194
chr5	27191975	27192231
chr5	27242020	27242209
chr5	27315711	27315967
chr5	27316468	27316724
chr5	27706989	27707245
chr5	27708744	27709000
chr5	27815117	27815373
chr5	27908558	27908814
chr5	28374791	28375047
chr5	28408421	28408548
chr5	28737372	28737628
chr5	28737874	28738130
chr5	29077618	29077874
chr5	29197822	29198078
chr5	29240570	29240826
chr5	29262921	29263013
chr5	29307646	29307902
chr5	29896818	29897074
chr5	30099794	30100050
chr5	30103183	30103439
chr5	30113058	30113314
chr5	32537592	32537862
chr5	32679352	32679608
chr5	32686942	32687198
chr5	32806133	32806389
chr5	32814767	32815023
chr5	33049989	33050245
chr5	33069007	33069263
chr5	33074716	33074972
chr5	33148402	33148658
chr5	33258237	33258493
chr5	33272498	33272754
chr5	33343844	33344100
chr5	33401679	33401935
chr5	34524296	34524552
chr5	34587869	34588139
chr5	34609015	34609271
chr5	34609409	34609665
chr5	35884310	35884454
chr5	35902420	35902676
chr5	36369457	36369713
chr5	36373594	36373850
chr5	36418325	36418581
chr5	36423041	36423297
chr5	36442534	36442790
chr5	36450720	36450976
chr5	36861997	36862253
chr5	37272722	37272978
chr5	38672546	38672802
chr5	39077146	39077402
chr5	39101018	39101105
chr5	39102475	39102731
chr5	39428915	39429011
chr5	39439890	39440146
chr5	39459275	39459531
chr5	39513511	39513611
chr5	39517995	39518251
chr5	39542107	39542363
chr5	39599869	39600125
chr5	39606377	39606633
chr5	39624684	39624940
chr5	39638975	39639231
chr5	39639969	39640225
chr5	39648965	39649221
chr5	39756052	39756308
chr5	39775184	39775440
chr5	39775624	39775880
chr5	40172885	40173141
chr5	40402072	40402328
chr5	40437733	40437989
chr5	40518637	40518709
chr5	40552417	40552583
chr5	40641506	40641762
chr5	40667336	40667592
chr5	42108632	42108888
chr5	42950806	42951024
chr5	43314922	43314992
chr5	43315577	43315694
chr5	43336433	43336689
chr5	43416449	43416719
chr5	43422342	43422598
chr5	43426097	43426353
chr5	43773685	43773941
chr5	44002755	44003011
chr5	44546471	44546727
chr5	44566090	44566346
chr5	44708715	44708971
chr5	44875790	44876046
chr5	50522244	50522500
chr5	50700158	50700414
chr5	50947770	50948026
chr5	51125174	51125430
chr5	52079191	52079447
chr5	52658486	52658742
chr5	52702547	52702803
chr5	52714681	52714937
chr5	52720450	52720706
chr5	53625890	53626146
chr5	55606639	55606909
chr5	55643041	55643297
chr5	55646425	55646681
chr5	56300733	56300989
chr5	56328993	56329249
chr5	56346673	56346929
chr5	56662660	56662916
chr5	56679111	56679367
chr5	56790528	56790784
chr5	56989014	56989190
chr5	57133498	57133754
chr5	57137575	57137831
chr5	57381651	57381907
chr5	57480795	57481051
chr5	57484138	57484394
chr5	61100981	61101237
chr5	61162849	61163105
chr5	61529310	61529566
chr5	62558067	62558323
chr5	65175566	65175822
chr5	65181789	65182045
chr5	67639317	67639573
chr5	67640288	67640544
chr5	67729999	67730255
chr5	67845080	67845336
chr5	68509675	68509945
chr5	71659032	71659288
chr5	72666511	72666767
chr5	73871524	73871780
chr5	73887913	73888183
chr5	73939114	73939370
chr5	74616868	74617124
chr5	75668424	75668680
chr5	76034881	76035151
chr5	76062674	76062930
chr5	76081354	76081610
chr5	76102024	76102280
chr5	76110080	76110336
chr5	76463661	76463917
chr5	77175842	77176112
chr5	77779724	77779994
chr5	77992541	77992797
chr5	77995332	77995588
chr5	77995750	77996006
chr5	78439826	78440082
chr5	78489603	78489859
chr5	78642386	78642656
chr5	79553293	79553563
chr5	81084912	81085182
chr5	81684745	81685015
chr5	81702134	81702390
chr5	82265127	82265383
chr5	83733518	83733774
chr5	85822808	85823078
chr5	86205385	86205641
chr5	86205807	86206063
chr5	86275655	86275911
chr5	88647931	88648187
chr5	88716831	88717087
chr5	88753909	88754165
chr5	88852161	88852260
chr5	88880164	88880420
chr5	89226639	89226895
chr5	89392576	89392832
chr5	89517872	89518128
chr5	90576369	90576481
chr5	90628210	90628480
chr5	91144392	91144469
chr5	91313684	91313940
chr5	91315285	91315541
chr5	91897413	91897669
chr5	92094299	92094555
chr5	92172656	92172912
chr5	92527890	92528146
chr5	92572821	92573077
chr5	95034033	95034289
chr5	95046635	95046891
chr5	95048200	95048456
chr5	95197156	95197412
chr5	95197700	95197956
chr5	95403771	95404027
chr5	95429810	95430066
chr5	95590698	95590954
chr5	95660517	95660773
chr5	95720128	95720384
chr5	95845064	95845320
chr5	95845749	95846005
chr5	95908678	95908934
chr5	95965607	95965863
chr5	95992843	95993099
chr5	97173999	97174255
chr5	98355952	98356208
chr5	99236321	99236577
chr5	99842057	99842313
chr5	100027317	100027573
chr5	102051170	102051426
chr5	102147708	102147964
chr5	102392974	102393230
chr5	102808662	102808918
chr5	103002830	103003086
chr5	103110469	103110725
chr5	103185752	103186008
chr5	103525711	103525967
chr5	105429938	105430194
chr5	107075413	107075669
chr5	107079386	107079642
chr5	107142484	107142740
chr5	107997354	107997610
chr5	108526895	108527151
chr5	108763488	108763569
chr5	111883978	111884248
chr5	112294233	112294489
chr5	112295656	112295912
chr5	114702060	114702316
chr5	114755615	114755871
chr5	114908908	114909164
chr5	115367838	115368108
chr5	118371876	118372132
chr5	119474807	119475063
chr5	120702299	120702555
chr5	123150007	123150263
chr5	123155635	123155891
chr5	123535610	123535866
chr5	123919529	123919785
chr5	123932618	123932874
chr5	123964794	123965050
chr5	124820858	124821114
chr5	125379859	125380115
chr5	125441787	125442043
chr5	125851859	125852115
chr5	127034019	127034275
chr5	127040798	127041054
chr5	127228602	127228858
chr5	127323802	127324058
chr5	127351775	127352045
chr5	127909778	127910034
chr5	127914889	127915145
chr5	129885588	129885844
chr5	131425888	131426158
chr5	131833422	131833678
chr5	133000086	133000342
chr5	133581126	133581249
chr5	133583268	133583381
chr5	133787633	133787889
chr5	133801511	133801781
chr5	133845032	133845288
chr5	133846807	133847063
chr5	134758888	134759144
chr5	134791927	134792197
chr5	134829154	134829410
chr5	135342573	135342829
chr5	135347111	135347367
chr5	135352573	135352829
chr5	135356274	135356530
chr5	135955848	135956118
chr5	135991228	135991484
chr5	136065755	136066011
chr5	137094657	137094913
chr5	137096659	137096915
chr5	137169189	137169445
chr5	139076404	139076674
chr5	139104592	139104848
chr5	139690540	139690810
chr5	141395709	141395979
chr5	141433081	141433337
chr5	141603228	141603484
chr5	141742384	141742640
chr5	141851983	141852253
chr5	142623565	142623821
chr5	142625713	142625888
chr5	142628791	142629061
chr5	142641970	142642226
chr5	142859035	142859291
chr5	142873751	142874007
chr5	142975890	142976146
chr5	143039273	143039529
chr5	143075108	143075364
chr5	143206780	143207036
chr5	143303521	143303777
chr5	143344594	143344850
chr5	143357541	143357797
chr5	144875367	144875623
chr5	145234325	145234581
chr5	145305018	145305274
chr5	147391392	147391502
chr5	148170077	148170333
chr5	148184932	148185202
chr5	148292681	148292937
chr5	148345419	148345675
chr5	148352703	148352959
chr5	148358024	148358280
chr5	148514211	148514336
chr5	148825449	148825705
chr5	148835653	148835923
chr5	148846089	148846359
chr5	148941469	148941586
chr5	149082834	149083104
chr5	149696826	149697082
chr5	149849304	149849560
chr5	149877174	149877430
chr5	150142936	150143206
chr5	153844812	153845068
chr5	153899004	153899260
chr5	153961559	153961815
chr5	153963522	153963638
chr5	153972734	153972990
chr5	154062442	154062698
chr5	156503561	156503817
chr5	158667440	158667696
chr5	158729294	158729564
chr5	158908873	158909129
chr5	158960262	158960518
chr5	159008958	159009214
chr5	159009819	159010075
chr5	159010353	159010609
chr5	159087456	159087726
chr5	159301380	159301636
chr5	159340144	159340400
chr5	159592169	159592425
chr5	159609107	159609377
chr5	159743070	159743326
chr5	159890850	159891106
chr5	161750538	161750794
chr5	162097343	162097599
chr5	162806618	162806874
chr5	163076726	163076803
chr5	163187580	163187836
chr5	163341918	163342174
chr5	163524852	163525108
chr5	163762894	163763150
chr5	163772216	163772472
chr5	163798000	163798064
chr5	168858464	168858720
chr5	169056919	169057175
chr5	169578419	169578689
chr5	169600316	169600572
chr5	169734619	169734889
chr5	170921833	170922103
chr5	171184964	171185220
chr5	172205221	172205477
chr5	172209225	172209481
chr5	172209649	172209905
chr5	172229642	172229898
chr5	172879218	172879474
chr5	172899315	172899571
chr5	173191455	173191711
chr5	173266427	173266554
chr5	173280483	173280753
chr5	173586669	173586925
chr5	173798669	173798925
chr5	173809710	173809966
chr5	173959570	173959826
chr5	173960717	173960973
chr5	173962763	173963019
chr5	173998809	173999065
chr5	175317042	175317298
chr5	176211224	176211480
chr5	178069588	178069844
chr5	180614653	180614923
chr5	180645148	180645418
chr6	33029890	33030160
chr6	1267492	1267748
chr6	1335786	1336042
chr6	1481682	1481805
chr6	1486071	1486143
chr6	1588256	1588512
chr6	2660203	2660459
chr6	2800209	2800479
chr6	2853967	2854223
chr6	2877771	2878027
chr6	2932560	2932830
chr6	2986271	2986527
chr6	3160493	3160763
chr6	3177023	3177293
chr6	3209548	3209818
chr6	3247958	3248228
chr6	3500940	3501196
chr6	3518564	3518820
chr6	3585607	3585863
chr6	3592699	3592955
chr6	3809188	3809444
chr6	3912188	3912444
chr6	4292060	4292330
chr6	4321147	4321403
chr6	4337409	4337679
chr6	4459395	4459651
chr6	4487871	4488127
chr6	4607694	4607950
chr6	4638027	4638297
chr6	4688328	4688598
chr6	4985146	4985416
chr6	6678521	6678777
chr6	6750279	6750535
chr6	6807062	6807332
chr6	6969006	6969148
chr6	6972862	6972959
chr6	7058660	7058930
chr6	7267719	7267975
chr6	7468828	7469098
chr6	7671469	7671725
chr6	7692471	7692727
chr6	7698342	7698598
chr6	9127412	9127668
chr6	9204486	9204742
chr6	9405663	9405919
chr6	9482398	9482559
chr6	9521051	9521307
chr6	9532872	9533128
chr6	9766475	9766731
chr6	10237984	10238240
chr6	10311072	10311328
chr6	10316566	10316822
chr6	10331926	10332182
chr6	10348036	10348292
chr6	10441546	10441802
chr6	10633501	10633771
chr6	10735036	10735292
chr6	11144103	11144179
chr6	11536003	11536259
chr6	11614122	11614378
chr6	11685669	11685925
chr6	11702737	11702993
chr6	11855189	11855445
chr6	11921262	11921518
chr6	11931489	11931759
chr6	12275393	12275649
chr6	12280745	12281001
chr6	12324549	12324653
[truncated: 3,100 more rows]
