# Supplementary material for: NF-Y Binding Site Architecture Defines a C-Fos Targeted Promoter Class
Source: PLoS One. 2016 Aug 12;11(8):e0160803. doi: 10.1371/journal.pone.0160803 (PMC4982600; doi:10.1371/journal.pone.0160803)
Supplement: S5 File — (BED) [file pone.0160803.s017.bed]

track name="E_inter" description="Intersection of union comparison" visibility=3 url=
chr1	1015577	1015847
chr1	5781906	5782176
chr1	8014176	8014446
chr1	8213507	8213777
chr1	8227371	8227641
chr1	8242507	8242763
chr1	8958406	8958676
chr1	11379123	11379393
chr1	12112113	12112369
chr1	12614025	12614295
chr1	14746500	14746770
chr1	15562813	15563083
chr1	15799120	15799390
chr1	15930095	15930230
chr1	16403408	16403664
chr1	18779152	18779359
chr1	19163259	19163401
chr1	19318136	19318406
chr1	20767378	20767506
chr1	22375164	22375434
chr1	22710532	22710802
chr1	22755231	22755390
chr1	22988983	22989253
chr1	23262023	23262293
chr1	23888913	23889183
chr1	23942962	23943232
chr1	24349263	24349519
chr1	24581400	24581538
chr1	24816929	24817199
chr1	25031861	25031987
chr1	25051018	25051288
chr1	25314628	25314898
chr1	25935137	25935407
chr1	26452904	26453174
chr1	27191565	27191821
chr1	27379064	27379334
chr1	28573767	28573971
chr1	29840035	29840115
chr1	30212112	30212382
chr1	30337516	30337786
chr1	30590622	30590892
chr1	30608643	30608913
chr1	31231756	31232026
chr1	31241814	31242084
chr1	31251332	31251571
chr1	31297307	31297563
chr1	31327076	31327243
chr1	31625344	31625600
chr1	32421598	32421854
chr1	33704001	33704271
chr1	33896712	33896803
chr1	37740962	37741232
chr1	37754562	37754832
chr1	37889515	37889588
chr1	40069393	40069663
chr1	40177079	40177349
chr1	41367700	41367956
chr1	41799035	41799305
chr1	43389956	43390113
chr1	46614089	46614359
chr1	46836053	46836323
chr1	46955297	46955567
chr1	47646872	47647142
chr1	53037588	53037723
chr1	53168707	53168827
chr1	54204816	54205072
chr1	54873230	54873500
chr1	54953985	54954255
chr1	54979987	54980118
chr1	55240967	55241056
chr1	59398514	59398770
chr1	64809198	64809321
chr1	85744604	85744860
chr1	87752707	87752977
chr1	90418833	90419089
chr1	92047997	92048267
chr1	93270307	93270577
chr1	110364764	110365020
chr1	115752851	115753107
chr1	115973501	115973648
chr1	117274131	117274401
chr1	117369989	117370092
chr1	150868150	150868406
chr1	151103730	151104000
chr1	151167801	151168057
chr1	151918907	151919163
chr1	152020577	152020833
chr1	154643877	154644147
chr1	156473124	156473380
chr1	161155214	161155484
chr1	165567457	165567624
chr1	166459495	166459765
chr1	170046134	170046404
chr1	180182585	180182855
chr1	181039857	181040127
chr1	181082156	181082412
chr1	186628190	186628446
chr1	189969572	189969828
chr1	192578362	192578632
chr1	192579727	192579983
chr1	193624459	193624715
chr1	194327115	194327385
chr1	194828581	194828851
chr1	201244424	201244680
chr1	202027331	202027587
chr1	202077608	202077864
chr1	203296467	203296723
chr1	204534929	204535199
chr1	206677496	206677766
chr1	207478318	207478431
chr1	207996079	207996266
chr1	213709091	213709361
chr1	213857870	213858140
chr1	219452791	219453047
chr1	220648619	220648889
chr1	221643686	221643942
chr1	221785861	221786117
chr1	224075895	224076151
chr1	224180254	224180524
chr1	226190530	226190800
chr1	226508677	226508947
chr1	227511426	227511682
chr1	228045102	228045207
chr1	228076692	228076962
chr1	228652319	228652589
chr1	228690323	228690593
chr1	229339280	229339550
chr1	232765839	232766095
chr1	235110894	235111150
chr1	235114483	235114739
chr1	235147483	235147753
chr1	244437173	244437429
chr1	244941705	244941961
chr1	246875798	246876068
chr1	247374089	247374345
chr1	248854830	248855100
chr1	249167986	249168256
chr1	249168423	249168693
chr2	54656937	54657207
chr2	634590	634846
chr2	8738538	8738674
chr2	9211237	9211493
chr2	9796522	9796778
chr2	9880873	9881129
chr2	10231969	10232239
chr2	10654984	10655240
chr2	11530098	11530354
chr2	11547222	11547492
chr2	20709793	20710063
chr2	23598308	23598578
chr2	25584894	25585164
chr2	36845661	36845731
chr2	37753551	37753821
chr2	37788816	37789072
chr2	42067990	42068260
chr2	43124101	43124215
chr2	48233267	48233537
chr2	53702484	53702740
chr2	56070399	56070655
chr2	61991319	61991589
chr2	62531888	62532158
chr2	64978133	64978353
chr2	64978377	64978633
chr2	67691052	67691308
chr2	68662112	68662382
chr2	71503511	71503781
chr2	73944075	73944345
chr2	85151945	85152215
chr2	85682665	85682935
chr2	85732156	85732412
chr2	85926585	85926728
chr2	86221134	86221404
chr2	86231186	86231456
chr2	88549885	88550155
chr2	88803266	88803536
chr2	96830592	96830862
chr2	108363410	108363680
chr2	119560689	119560834
chr2	129901746	129902016
chr2	131966845	131966971
chr2	134490648	134490918
chr2	150990285	150990399
chr2	152628157	152628427
chr2	156299522	156299778
chr2	157223337	157223607
chr2	158786533	158786803
chr2	160793047	160793317
chr2	171018473	171018743
chr2	173104705	173104975
chr2	176903577	176903673
chr2	183507117	183507387
chr2	201039892	201040162
chr2	210233689	210233945
chr2	212069749	212070005
chr2	217258305	217258575
chr2	224505896	224506166
chr2	227665863	227666133
chr2	228253496	228253752
chr2	230585088	230585344
chr2	232047379	232047649
chr2	232476531	232476787
chr2	232571722	232571917
chr2	232582013	232582283
chr2	240418554	240418824
chr2	240832595	240832865
chr3	4516612	4516882
chr3	5065100	5065356
chr3	5561927	5562197
chr3	9014354	9014538
chr3	9684420	9684690
chr3	10636712	10636908
chr3	10739804	10739872
chr3	11017594	11017864
chr3	11811964	11812234
chr3	12724149	12724419
chr3	13135340	13135460
chr3	13311277	13311547
chr3	13579472	13579728
chr3	14361159	14361429
chr3	27562967	27563223
chr3	33833240	33833510
chr3	33931131	33931401
chr3	33977780	33978050
chr3	36815592	36815848
chr3	38192299	38192569
chr3	43778125	43778381
chr3	45278505	45278775
chr3	45385482	45385752
chr3	46152595	46152865
chr3	51776351	51776621
chr3	67040690	67040960
chr3	71690954	71691045
chr3	72084189	72084459
chr3	72173273	72173543
chr3	72388343	72388613
chr3	83952003	83952259
chr3	93881536	93881792
chr3	108582306	108582562
chr3	109404305	109404561
chr3	115155585	115155841
chr3	128224710	128224980
chr3	128240618	128240888
chr3	128267692	128267783
chr3	129024527	129024797
chr3	141365654	141365924
chr3	141577288	141577558
chr3	145884368	145884624
chr3	149108485	149108741
chr3	149119405	149119661
chr3	150089695	150089951
chr3	155580415	155580685
chr3	160413749	160414005
chr3	160415811	160416067
chr3	165635872	165635966
chr3	170398457	170398727
chr3	170463176	170463432
chr3	171594546	171594802
chr3	177075286	177075542
chr3	177076277	177076547
chr3	189042598	189042854
chr3	189176327	189176583
chr3	189632677	189632933
chr3	189655546	189655688
chr3	193807387	193807643
chr3	195641993	195642263
chr3	195906308	195906578
chr3	196589964	196590234
chr3	197205703	197205959
chr4	1505602	1505872
chr4	1513445	1513731
chr4	4028516	4028786
chr4	7075343	7075613
chr4	7122188	7122335
chr4	15152716	15152986
chr4	17537614	17537884
chr4	24807180	24807450
chr4	25938385	25938655
chr4	26264930	26265008
chr4	53588483	53588753
chr4	55270125	55270395
chr4	67440756	67441012
chr4	106227531	106227801
chr4	112880383	112880639
chr4	127877033	127877303
chr4	129644627	129644897
chr4	142253782	142254052
chr4	150744901	150745157
chr4	155579872	155580142
chr4	160024034	160024304
chr4	170284535	170284791
chr4	184531236	184531506
chr4	185201857	185202127
chr4	186037140	186037410
chr5	577385	577655
chr5	582703	582973
chr5	765392	765662
chr5	777636	777906
chr5	1138299	1138569
chr5	1380209	1380479
chr5	5343036	5343292
chr5	5351545	5351801
chr5	10485216	10485472
chr5	10551476	10551732
chr5	13359487	13359743
chr5	14972055	14972325
chr5	17695124	17695334
chr5	24066040	24066174
chr5	24832188	24832444
chr5	28301823	28302079
chr5	28726982	28727238
chr5	33370268	33370524
chr5	36725211	36725481
chr5	39092709	39092799
chr5	39669132	39669402
chr5	40447118	40447374
chr5	44538882	44539138
chr5	53115458	53115728
chr5	55597019	55597275
chr5	56328149	56328233
chr5	60597645	60597901
chr5	60615569	60615839
chr5	61572903	61573173
chr5	63961894	63962164
chr5	66502804	66503060
chr5	71310950	71311220
chr5	76086500	76086756
chr5	77105804	77106074
chr5	84943574	84943844
chr5	87437259	87437529
chr5	88578732	88578824
chr5	88609692	88609962
chr5	90515063	90515319
chr5	92643357	92643613
chr5	95309792	95310062
chr5	95828427	95828683
chr5	104728677	104728789
chr5	115700852	115701122
chr5	120153817	120154087
chr5	120609877	120609950
chr5	122545370	122545640
chr5	124084458	124084728
chr5	134895128	134895284
chr5	138882709	138882830
chr5	138929865	138930135
chr5	139079670	139079846
chr5	139084910	139085180
chr5	141659708	141659978
chr5	142886465	142886721
chr5	142974977	142975233
chr5	143078219	143078475
chr5	144863832	144864088
chr5	148827620	148827890
chr5	149699914	149700170
chr5	153211653	153211813
chr5	157306795	157307065
chr5	168777878	168777967
chr5	170964979	170965249
chr5	171279247	171279517
chr5	172243953	172244223
chr5	172729496	172729752
chr5	172882419	172882675
chr5	172890292	172890562
chr5	173107001	173107271
chr5	173249507	173249763
chr5	173294043	173294313
chr5	173782242	173782498
chr5	174075718	174075988
chr5	175173910	175174180
chr5	176214801	176214902
chr5	176543902	176544092
chr5	178259820	178260090
chr5	179637200	179637470
chr5	179892055	179892325
chr5	180459663	180459933
chr5	180633769	180634039
chr5	180708230	180708370
chr6	1325909	1326165
chr6	3612576	3612832
chr6	3613028	3613284
chr6	4179270	4179540
chr6	4180985	4181118
chr6	4281026	4281282
chr6	4358863	4359119
chr6	6657782	6657864
chr6	6851475	6851573
chr6	8283200	8283470
chr6	10719874	10720144
chr6	14039303	14039573
chr6	14211202	14211472
chr6	14800268	14800375
chr6	14982238	14982508
chr6	16226743	16227013
chr6	17015826	17016096
chr6	17729444	17729714
chr6	20000045	20000113
chr6	20334669	20334939
chr6	25742330	25742600
chr6	26022403	26022673
chr6	26055528	26055733
chr6	26195632	26195763
chr6	26269197	26269453
chr6	26351750	26352006
chr6	26571945	26572215
chr6	27640057	27640327
chr6	27807541	27807811
chr6	27834137	27834407
chr6	27862176	27862374
chr6	28833817	28834087
chr6	28853630	28853900
chr6	28949858	28950128
chr6	28983548	28983818
chr6	29520410	29520680
chr6	29617797	29618067
chr6	30483930	30484200
chr6	30720203	30720459
chr6	30783328	30783598
chr6	30840766	30841036
chr6	31820345	31820615
chr6	32405295	32405565
chr6	32441360	32441630
chr6	32572287	32572557
chr6	32577676	32577854
chr6	32636164	32636434
chr6	32658038	32658308
chr6	32997255	32997525
chr6	33025094	33025364
chr6	33488790	33489060
chr6	33783695	33783965
chr6	33894352	33894489
chr6	33984528	33984798
chr6	35118103	35118182
chr6	35145013	35145283
chr6	37468818	37469088
chr6	37540198	37540468
chr6	40132261	40132449
chr6	42523657	42523927
chr6	43796564	43796713
chr6	43966384	43966654
chr6	44009342	44009598
chr6	44020282	44020552
chr6	57113303	57113573
chr6	82393727	82393983
chr6	91078824	91078966
chr6	93039283	93039539
chr6	95967167	95967437
chr6	106244053	106244309
chr6	106440365	106440635
chr6	108879664	108879759
chr6	110364057	110364327
chr6	113259915	113260171
chr6	113673334	113673590
chr6	117762175	117762431
chr6	127687559	127687815
chr6	130186160	130186430
chr6	140364517	140364773
chr6	140468918	140469188
chr6	140688205	140688461
chr6	150590924	150591194
chr6	150632532	150632802
chr6	158100746	158100814
chr6	158211030	158211300
chr6	159290876	159291146
chr6	159495465	159495645
chr6	159527850	159528053
chr6	164092481	164092751
chr6	167700492	167700762
chr6	169467592	169467862
chr7	1458179	1458449
chr7	1465283	1465553
chr7	1560212	1560468
chr7	1808596	1808753
chr7	2903332	2903588
chr7	5601596	5601866
chr7	5609817	5609942
chr7	7139213	7139469
chr7	7951020	7951276
chr7	17134597	17134853
chr7	17411318	17411574
chr7	20259456	20259653
chr7	22911758	22912028
chr7	23325362	23325632
chr7	23513915	23514185
chr7	24092642	24092765
chr7	24115143	24115399
chr7	24458777	24459047
chr7	25894759	25894967
chr7	25896723	25896887
chr7	25901977	25902059
chr7	25990682	25990952
chr7	26319077	26319347
chr7	31033415	31033685
chr7	43012253	43012523
chr7	43116051	43116321
chr7	43612149	43612419
chr7	43874360	43874630
chr7	46803805	46804061
chr7	47643098	47643368
chr7	47709141	47709397
chr7	55063719	55063975
chr7	63924157	63924235
chr7	65958511	65958781
chr7	66440245	66440515
chr7	66903299	66903387
chr7	73207093	73207179
chr7	73866689	73866945
chr7	75795819	75796089
chr7	75947324	75947580
chr7	76009282	76009552
chr7	76012541	76012709
chr7	81314346	81314512
chr7	84305087	84305343
chr7	84510386	84510656
chr7	98087439	98087709
chr7	98143506	98143776
chr7	98189386	98189656
chr7	100825827	100826009
chr7	100895622	100895892
chr7	100992586	100992856
chr7	106209337	106209607
chr7	106210054	106210324
chr7	106627080	106627350
chr7	106658487	106658757
chr7	116591722	116591992
chr7	119590918	119590986
chr7	121145178	121145448
chr7	127069906	127070176
chr7	127903597	127903737
chr7	131287192	131287462
chr7	131769653	131769923
chr7	135771586	135771856
chr7	138037464	138037545
chr7	138044680	138044936
chr7	148282544	148282814
chr7	148684503	148684773
chr7	150521510	150521780
chr7	152212744	152213014
chr7	152887654	152887844
chr8	1703738	1704008
chr8	27131893	27132163
chr8	10562495	10562765
chr8	22530874	22531144
chr8	23346648	23346918
chr8	27474686	27474836
chr8	29317211	29317467
chr8	37763416	37763686
chr8	38558320	38558590
chr8	42424224	42424494
chr8	49385257	49385527
chr8	50708071	50708327
chr8	60190684	60190940
chr8	60609456	60609712
chr8	61966096	61966366
chr8	62702498	62702754
chr8	74268624	74268880
chr8	90624139	90624267
chr8	94294353	94294609
chr8	95132259	95132529
chr8	96241991	96242066
chr8	97146778	97147048
chr8	102166024	102166294
chr8	103611936	103612206
chr8	112052610	112052880
chr8	119862515	119862631
chr8	119890597	119890853
chr8	122157796	122158052
chr8	124073054	124073324
chr8	124560540	124560796
chr8	125238737	125238993
chr8	126559372	126559628
chr8	128680858	128681114
chr8	128821930	128822186
chr8	131054559	131054815
chr8	140718910	140719180
chr8	142391017	142391150
chr8	142401940	142402210
chr8	142583530	142583761
chr8	142741258	142741528
chr8	144974059	144974254
chr9	1759016	1759286
chr9	5879643	5879777
chr9	6102670	6102926
chr9	6153511	6153767
chr9	6704217	6704322
chr9	14961522	14961792
chr9	21616130	21616386
chr9	21677917	21678173
chr9	22148224	22148480
chr9	36766006	36766276
chr9	37392415	37392685
chr9	37632564	37632834
chr9	81780959	81781215
chr9	89109696	89109952
chr9	90060602	90060872
chr9	91396745	91397015
chr9	91795246	91795502
chr9	95853771	95854027
chr9	96928305	96928561
chr9	96928945	96929201
chr9	97241376	97241646
chr9	98491953	98492223
chr9	100466406	100466662
chr9	100499847	100499996
chr9	100639033	100639289
chr9	101049807	101049960
chr9	101633405	101633675
chr9	110331509	110331765
chr9	110819766	110820022
chr9	117160659	117160929
chr9	117541772	117542028
chr9	121094105	121094205
chr9	121098485	121098741
chr9	122861424	122861694
chr9	124004931	124005201
chr9	124011941	124012211
chr9	126695803	126696059
chr9	126993657	126993927
chr9	128161518	128161788
chr9	128172589	128172780
chr9	129525716	129525986
chr9	129553806	129554062
chr9	129995471	129995741
chr9	130007434	130007690
chr9	130461699	130461864
chr9	130811110	130811188
chr9	132346489	132346596
chr9	133003016	133003092
chr9	133016699	133016969
chr9	133377109	133377379
chr9	133424525	133424795
chr9	133565429	133565685
chr9	134248826	134248982
chr9	135849269	135849374
chr9	135964763	135965033
chr9	136154227	136154497
chr9	139668225	139668495
chr9	139844495	139844707
chr9	140188750	140189020
chrX	1780056	1780326
chrX	1780583	1780706
chrX	3213820	3214090
chrX	3732883	3733139
chrX	9385089	9385345
chrX	15637654	15637802
chrX	16790668	16790938
chrX	20396382	20396638
chrX	39809308	39809578
chrX	41887433	41887703
chrX	45338513	45338769
chrX	45339379	45339635
chrX	46988593	46988702
chrX	47221091	47221361
chrX	47221561	47221817
chrX	47415517	47415746
chrX	48138561	48138747
chrX	48534736	48534992
chrX	48595541	48595797
chrX	53506252	53506522
chrX	67791641	67791897
chrX	68776239	68776509
chrX	70273176	70273446
chrX	70401953	70402209
chrX	100352916	100353186
chrX	106928277	106928547
chrX	117604616	117604886
chrX	118161879	118162149
chrX	118206725	118206995
chrX	118321352	118321622
chrX	119019924	119020194
chrX	120331433	120331689
chrX	124892211	124892481
chrX	129065341	129065611
chrX	133898308	133898578
chrX	151073537	151073807
chrX	152500311	152500581
chrX	152941720	152941990
chrX	153193808	153194078
chr10	3894573	3894829
chr10	5871270	5871540
chr10	9917397	9917667
chr10	12351878	12352148
chr10	18239328	18239598
chr10	28592054	28592224
chr10	28718841	28719111
chr10	30073352	30073608
chr10	32049093	32049363
chr10	33338874	33339144
chr10	43913573	43913843
chr10	48317756	48318012
chr10	48420402	48420523
chr10	48656753	48657023
chr10	50777313	50777569
chr10	62826772	62827028
chr10	63395862	63396118
chr10	71754097	71754367
chr10	72338215	72338485
chr10	72339364	72339634
chr10	73620212	73620468
chr10	74020261	74020517
chr10	74057830	74057997
chr10	74091810	74092066
chr10	79894716	79894986
chr10	80059980	80060250
chr10	80166797	80167067
chr10	80472024	80472294
chr10	82444108	82444235
chr10	85524464	85524720
chr10	89605735	89605991
chr10	89912579	89912835
chr10	91544921	91545191
chr10	104956965	104957235
chr10	119412727	119412983
chr10	119656116	119656386
chr10	125733886	125734156
chr10	126605282	126605538
chr10	134346276	134346532
chr11	329509	329747
chr11	3366992	3367262
chr11	5612836	5613106
chr11	9587607	9587806
chr11	10930131	10930401
chr11	11005873	11006143
chr11	17229909	17230179
chr11	17705136	17705392
chr11	17725684	17725809
chr11	28588276	28588532
chr11	29141687	29141825
chr11	43890578	43890848
chr11	44422029	44422299
chr11	45599926	45600196
chr11	45615636	45615779
chr11	45668285	45668361
chr11	45817063	45817333
chr11	47939495	47939765
chr11	58668211	58668481
chr11	58673267	58673537
chr11	59312909	59313030
chr11	62323676	62323946
chr11	62324069	62324325
chr11	63570655	63570911
chr11	64140436	64140692
chr11	64212363	64212633
chr11	64656447	64656717
chr11	65244928	65245184
chr11	65255054	65255310
chr11	65511914	65512184
chr11	66774152	66774236
chr11	67307138	67307408
chr11	68910500	68910594
chr11	69002368	69002553
chr11	69197154	69197342
chr11	69258215	69258329
chr11	69614347	69614617
chr11	70309260	70309530
chr11	71010469	71010725
chr11	71020719	71020989
chr11	71047818	71048088
chr11	73490752	73491008
chr11	75265607	75265877
chr11	75385173	75385443
chr11	85885201	85885457
chr11	86454825	86455081
chr11	92805855	92806111
chr11	93303943	93304199
chr11	93858598	93858868
chr11	94480428	94480684
chr11	104917984	104918240
chr11	118663494	118663764
chr11	118799296	118799372
chr11	124994102	124994372
chr11	130206683	130206953
chr11	130392151	130392407
chr12	798758	799028
chr12	6873458	6873714
chr12	8179201	8179457
chr12	9602334	9602604
chr12	20099602	20099858
chr12	25539075	25539345
chr12	25611027	25611192
chr12	31886726	31886982
chr12	31902144	31902400
chr12	46825585	46825841
chr12	46918000	46918270
chr12	47357825	47358081
chr12	48591900	48592170
chr12	49016787	49017057
chr12	49627672	49627942
chr12	51327545	51327815
chr12	52998695	52998965
chr12	53268022	53268292
chr12	54090084	54090354
chr12	54214379	54214635
chr12	54553018	54553288
chr12	54753004	54753157
chr12	58266208	58266478
chr12	58827847	58828103
chr12	67756423	67756491
chr12	69186764	69187034
chr12	69462306	69462562
chr12	76722950	76723206
chr12	83967519	83967775
chr12	86159310	86159566
chr12	87833998	87834254
chr12	90163030	90163189
chr12	91775179	91775449
chr12	92028589	92028714
chr12	92172774	92173030
chr12	95348081	95348337
chr12	96821229	96821485
chr12	102318483	102318753
chr12	105817726	105817996
chr12	106337373	106337643
chr12	108473560	108473830
chr12	108491371	108491641
chr12	108511277	108511451
chr12	110517625	110517895
chr12	110540168	110540424
chr12	113022198	113022370
chr12	113154400	113154524
chr12	114126187	114126457
chr12	114679882	114680152
chr12	115231928	115232198
chr12	115371330	115371586
chr12	115374539	115374795
chr12	116796841	116797111
chr12	116886880	116887150
chr12	118979790	118980060
chr12	119088398	119088668
chr12	119312706	119312976
chr12	119667672	119667942
chr12	119752164	119752434
chr12	120755399	120755655
chr12	121566785	121567055
chr12	122028117	122028373
chr12	122502046	122502248
chr12	122502785	122503055
chr12	123234521	123234791
chr12	125068458	125068728
chr12	125120789	125121059
chr12	125229312	125229478
chr12	125401669	125401925
chr12	125534166	125534366
chr12	125634222	125634492
chr12	125635852	125636122
chr12	125732063	125732333
chr12	127646917	127647187
chr12	130554626	130554896
chr12	130624581	130624837
chr12	131727596	131727716
chr12	131900450	131900590
chr12	131978049	131978319
chr12	132014444	132014609
chr12	132044800	132045070
chr12	132076885	132077100
chr12	132126849	132127006
chr12	132999898	133000168
chr12	133170602	133170872
chr12	133485155	133485295
chr13	19692443	19692713
chr13	34266234	34266504
chr13	40690229	40690485
chr13	43754210	43754480
chr13	48073953	48074209
chr13	48282627	48282883
chr13	50209734	50210004
chr13	74864622	74864892
chr13	81914398	81914668
chr13	111617792	111617912
chr13	113274057	113274327
chr14	21148168	21148438
chr14	21924218	21924488
chr14	23083199	23083455
chr14	24858507	24858777
chr14	31698982	31699238
chr14	34858074	34858330
chr14	34966151	34966407
chr14	35845852	35846122
chr14	38759875	38760131
chr14	52543196	52543452
chr14	52547564	52547820
chr14	55925710	55925966
chr14	58637882	58638138
chr14	64144652	64144908
chr14	75087323	75087579
chr14	75725801	75726071
chr14	77346848	77347118
chr14	77360671	77360941
chr14	81902818	81902915
chr14	89479504	89479774
chr14	90849580	90849735
chr14	90956469	90956739
chr14	91294540	91294632
chr14	96299859	96300129
chr14	97129940	97130210
chr14	97229171	97229289
chr14	99827427	99827506
chr14	100659251	100659521
chr14	101088305	101088426
chr14	102176552	102176822
chr14	102414514	102414770
chr14	102991025	102991281
chr14	103223674	103223747
chr14	104328864	104329134
chr15	21905802	21906072
chr15	36663036	36663292
chr15	40874095	40874365
chr15	40875047	40875317
chr15	45021020	45021290
chr15	65186213	65186483
chr15	66125054	66125310
chr15	66981232	66981502
chr15	68171156	68171426
chr15	69818061	69818129
chr15	69849860	69850047
chr15	70115552	70115822
chr15	70392013	70392122
chr15	70722455	70722711
chr15	70800275	70800531
chr15	72564918	72565188
chr15	74666735	74666883
chr15	74818445	74818701
chr15	74890622	74890878
chr15	75437811	75438067
chr15	75442472	75442728
chr15	75445545	75445815
chr15	75491032	75491302
chr15	75531888	75532158
chr15	77892305	77892479
chr15	78128788	78129058
chr15	78645470	78645740
chr15	79806336	79806606
chr15	83738051	83738321
chr15	89462087	89462343
chr15	90000417	90000687
chr15	90005878	90005957
chr15	90708933	90709189
chr15	93374905	93375161
chr15	95456167	95456305
chr15	96679122	96679392
chr15	98419176	98419446
chr15	100049159	100049429
chr15	101253732	101253988
chr15	101262176	101262346
chr15	101685565	101685835
chr16	329095	329208
chr16	2845781	2846037
chr16	2955759	2956015
chr16	3054018	3054140
chr16	4666266	4666456
chr16	8158928	8159198
chr16	8438736	8439006
chr16	9090865	9091135
chr16	9162199	9162469
chr16	9233842	9234112
chr16	9277678	9277948
chr16	11332430	11332700
chr16	11734387	11734643
chr16	13654159	13654267
chr16	16001964	16002220
chr16	16984976	16985112
chr16	17076542	17076812
chr16	22215915	22216185
chr16	22681904	22682174
chr16	23238937	23239079
chr16	24505270	24505526
chr16	24657642	24657898
chr16	26799310	26799580
chr16	27095369	27095527
chr16	27118786	27118855
chr16	27386447	27386717
chr16	29657051	29657321
chr16	30047893	30048163
chr16	30645637	30645893
chr16	30669459	30669729
chr16	49487942	49488212
chr16	49518366	49518636
chr16	49958044	49958314
chr16	50416361	50416631
chr16	50685772	50686042
chr16	54471915	54472185
chr16	56760879	56761149
chr16	57334280	57334550
chr16	58270324	58270594
chr16	67051990	67052092
chr16	69440948	69441102
chr16	69511106	69511362
chr16	69556709	69556979
chr16	72698812	72699068
chr16	75551192	75551381
chr16	77690973	77691052
chr16	78036935	78037205
chr16	79879735	79880005
chr16	80966690	80966946
chr16	81266419	81266689
chr16	83897343	83897613
chr16	84291829	84292099
chr16	84300061	84300317
chr16	84314767	84314952
chr16	84570792	84570860
chr16	84670601	84670871
chr16	84720416	84720686
chr16	85995947	85996026
chr16	86462370	86462640
chr16	86667969	86668239
chr16	86675777	86676047
chr16	87009165	87009421
chr16	87179105	87179361
chr16	88354989	88355163
chr16	88865563	88865833
chr16	90143676	90143932
chr17	1366598	1366868
chr17	2952263	2952533
chr17	5662073	5662343
chr17	6231651	6231921
chr17	6843670	6843940
chr17	7738809	7739079
chr17	8059700	8059956
chr17	8095567	8095723
chr17	8207888	8208158
chr17	17294896	17295166
chr17	17319428	17319698
chr17	17536067	17536337
chr17	17743400	17743670
chr17	21002638	21002777
chr17	21179051	21179321
chr17	21226368	21226547
chr17	21515844	21516114
chr17	21837374	21837644
chr17	21849883	21850153
chr17	25667092	25667348
chr17	26257136	26257392
chr17	30002803	30003073
chr17	30058800	30059070
chr17	30089169	30089439
chr17	33894979	33895141
chr17	36784759	36785029
chr17	38699280	38699550
chr17	38753026	38753108
chr17	39686459	39686715
chr17	40819539	40819795
chr17	41780180	41780277
chr17	42215609	42215865
chr17	42277519	42277712
chr17	42365913	42366183
chr17	42664778	42665034
chr17	43449063	43449319
chr17	45177568	45177824
chr17	46102378	46102648
chr17	46180405	46180675
chr17	47270220	47270476
chr17	49450059	49450329
chr17	54993308	54993564
chr17	57920551	57920807
chr17	58212984	58213254
chr17	72186337	72186607
chr17	72902545	72902815
chr17	72909752	72910022
chr17	73577201	73577471
chr17	74667865	74668004
chr17	75275923	75276193
chr17	75954490	75954760
chr17	76237582	76237862
chr17	76579289	76579559
chr17	77702485	77702565
chr17	77783923	77784193
chr17	78505258	78505528
chr17	79320006	79320276
chr17	79367907	79368000
chr17	79369108	79369191
chr17	79439135	79439358
chr17	79448456	79448678
chr17	79454913	79455183
chr17	79460760	79460901
chr17	80250609	80250865
chr17	80325730	80326087
chr18	136457	136727
chr18	3230480	3230750
chr18	8883028	8883284
chr18	9631894	9632150
chr18	9869959	9870215
chr18	9876985	9877241
chr18	9912382	9912652
chr18	11947322	11947592
chr18	18711885	18712155
chr18	32509263	32509519
chr18	35250128	35250398
chr18	36520783	36521053
chr18	42746380	42746636
chr18	45898659	45898929
chr18	55513556	55513812
chr18	55569130	55569386
chr18	65093064	65093320
chr18	68004434	68004690
chr19	28704650	28704920
chr19	1260890	1261108
chr19	1516478	1516748
chr19	1542659	1542867
chr19	2061484	2061754
chr19	2375441	2375688
chr19	2884045	2884315
chr19	2950687	2950820
chr19	3070582	3070852
chr19	3073304	3073574
chr19	3344245	3344419
chr19	3971155	3971371
chr19	3990278	3990470
chr19	4759903	4759993
chr19	5165554	5165824
chr19	5407519	5407618
chr19	5436733	5436906
chr19	5452944	5453214
chr19	6536167	6536423
chr19	6564541	6564811
chr19	6604117	6604267
chr19	7577235	7577505
chr19	7723294	7723564
chr19	8226151	8226313
chr19	10399462	10399553
chr19	10589711	10589981
chr19	11592875	11593145
chr19	11641285	11641555
chr19	11750395	11750665
chr19	11805804	11805919
chr19	13297081	13297351
chr19	13755538	13755743
chr19	13783418	13783688
chr19	13800003	13800273
chr19	13944462	13944669
chr19	14379917	14380187
chr19	14465285	14465555
chr19	14477557	14477691
chr19	15270136	15270406
chr19	15334143	15334413
chr19	15947827	15948083
chr19	16162402	16162606
chr19	17400426	17400578
chr19	17501912	17501995
chr19	17817568	17817838
chr19	18133009	18133265
chr19	18439333	18439485
chr19	19971947	19972217
chr19	20349157	20349427
chr19	20958947	20959133
chr19	21182503	21182773
chr19	30297087	30297357
chr19	30351477	30351747
chr19	30370004	30370260
chr19	36076895	36076982
chr19	36087396	36087474
chr19	36193306	36193454
chr19	36195183	36195314
chr19	37808572	37808699
chr19	39817060	39817174
chr19	39921323	39921593
chr19	41156269	41156460
chr19	41277225	41277495
chr19	41571009	41571141
chr19	42772344	42772614
chr19	42773059	42773159
chr19	42773242	42773390
chr19	42784527	42784783
chr19	45829481	45829751
chr19	46431045	46431234
chr19	47322090	47322334
chr19	47359317	47359587
chr19	47363430	47363515
chr19	47746276	47746546
chr19	48103628	48103898
chr19	48395535	48395733
chr19	49315540	49315810
chr19	49834890	49835160
chr19	50449745	50450015
chr19	50872471	50872741
chr19	50934965	50935064
chr19	51111353	51111450
chr19	51231727	51231997
chr19	51263228	51263403
chr19	51275788	51275946
chr19	51497528	51497685
chr19	51897544	51897762
chr19	52050086	52050212
chr19	52288240	52288510
chr19	56638752	56639022
chr19	56826457	56826727
chr19	58330905	58331175
chr19	58912796	58912877
chr19	58954440	58954710
chr20	570005	570275
chr20	731595	731679
chr20	1066221	1066491
chr20	22666770	22667040
chr20	24089735	24090005
chr20	30165801	30166071
chr20	30195116	30195372
chr20	31560068	31560338
chr20	34127618	34127764
chr20	39135177	39135433
chr20	39637007	39637263
chr20	40293352	40293477
chr20	42718706	42718828
chr20	43321679	43321807
chr20	43357522	43357778
chr20	43364956	43365226
chr20	43367528	43367784
chr20	43485603	43485873
chr20	45323359	45323427
chr20	45989518	45989788
chr20	46029531	46029664
chr20	46725839	46725942
chr20	46726824	46727094
chr20	46911622	46911892
chr20	47181593	47181863
chr20	47459741	47460011
chr20	48903183	48903439
chr20	48951813	48951932
chr20	48985495	48985765
chr20	48999654	48999924
chr20	49039775	49040031
chr20	49041724	49041994
chr20	49084624	49084894
chr20	49116008	49116194
chr20	49609761	49609855
chr20	49702384	49702654
chr20	55403501	55403771
chr20	55681515	55681586
chr20	56004632	56004934
chr20	56036214	56036484
chr20	56293652	56293724
chr20	56578702	56578972
chr20	56596624	56596894
chr20	58624349	58624477
chr20	59325307	59325577
chr20	60534435	60534705
chr20	62466338	62466608
chr21	15399650	15399774
chr21	16048469	16048739
chr21	33406848	33407118
chr21	34755366	34755636
chr21	35402456	35402607
chr21	35434338	35434608
chr21	37802348	37802618
chr21	38936133	38936260
chr21	40338101	40338263
chr21	43594423	43594502
chr21	43884089	43884219
chr21	44029924	44030194
chr21	44772545	44772729
chr21	47063345	47063615
chr21	47442502	47442691
chr21	48017967	48018237
chr22	21011192	21011528
chr22	22478081	22478351
chr22	23358772	23359042
chr22	25631963	25632082
chr22	27256235	27256505
chr22	27366830	27367100
chr22	27679844	27679912
chr22	27993709	27993979
chr22	28114229	28114485
chr22	28115641	28115911
chr22	29269686	29269773
chr22	30275758	30276028
chr22	30907925	30908195
chr22	31460018	31460130
chr22	31508685	31508955
chr22	31789870	31790140
chr22	32058149	32058419
chr22	32072656	32072926
chr22	35552458	35552597
chr22	35833214	35833291
chr22	37137515	37137785
chr22	37297964	37298234
chr22	37557561	37557831
chr22	37997654	37997924
chr22	38064099	38064369
chr22	38674814	38675084
chr22	39319850	39320120
chr22	39579990	39580260
chr22	40120550	40120674
chr22	41037327	41037597
chr22	41047740	41047869
chr22	41844467	41844723
chr22	42765297	42765567
chr22	43795420	43795690
chr22	45998726	45998887
chr22	46957463	46957719
chr22	47666262	47666532
chr22	47724699	47724955
chr22	50063251	50063319
