# Supplementary material for: NF-Y Binding Site Architecture Defines a C-Fos Targeted Promoter Class
Source: PLoS One. 2016 Aug 12;11(8):e0160803. doi: 10.1371/journal.pone.0160803 (PMC4982600; doi:10.1371/journal.pone.0160803)
Supplement: S6 File — (BED) [file pone.0160803.s018.bed]

track name="NFYB only" description="NFYB only of union comparison" visibility=3 url=
chr1	109182833	109183197
chr1	953208	953528
chr1	2477581	2477945
chr1	2478235	2478615
chr1	2515438	2515519
chr1	2730500	2730635
chr1	3535556	3535876
chr1	3838854	3838958
chr1	5188513	5188833
chr1	5698729	5699049
chr1	6455312	6455556
chr1	6797353	6797673
chr1	6812421	6812801
chr1	8100578	8100942
chr1	8108221	8108585
chr1	8164610	8164930
chr1	8264510	8264874
chr1	8284934	8285298
chr1	8375575	8375895
chr1	9046215	9046579
chr1	9140486	9140866
chr1	9220233	9220553
chr1	9222907	9223287
chr1	9533126	9533490
chr1	10485929	10486249
chr1	10933346	10933666
chr1	11113278	11113598
chr1	11122983	11123363
chr1	11425795	11426159
chr1	11650521	11650841
chr1	11967811	11968131
chr1	11968870	11969234
chr1	12213315	12213695
chr1	12626072	12626392
chr1	14308919	14309239
chr1	14580766	14581146
chr1	14722183	14722503
chr1	14761746	14762066
chr1	14843464	14843844
chr1	14887906	14888018
chr1	15914820	15915184
chr1	16158558	16158788
chr1	16485508	16485872
chr1	16509677	16509891
chr1	16542636	16543016
chr1	16543911	16544291
chr1	17222018	17222338
chr1	17222562	17222942
chr1	17222813	17223193
chr1	17231175	17231539
chr1	17231476	17231840
chr1	17482582	17482962
chr1	17814293	17814657
chr1	18038035	18038355
chr1	18303377	18303741
chr1	18306346	18306666
chr1	18336902	18337266
chr1	18784660	18784980
chr1	19389161	19389525
chr1	19986222	19986586
chr1	20310456	20310635
chr1	20577064	20577444
chr1	20765847	20766167
chr1	20846017	20846337
chr1	20850502	20850822
chr1	20851486	20851806
chr1	20896054	20896374
chr1	21820693	21821013
chr1	22357776	22358140
chr1	22366296	22366676
chr1	22496425	22496555
chr1	22703504	22703868
chr1	23527438	23527802
chr1	23875238	23875558
chr1	23926826	23927206
chr1	23946201	23946581
chr1	23977609	23977973
chr1	24263290	24263610
chr1	24284739	24285119
chr1	24519537	24519901
chr1	24961603	24961983
chr1	25024055	25024419
chr1	25042255	25042429
chr1	25048626	25048990
chr1	25348943	25349323
chr1	25357238	25357618
chr1	25358740	25359120
chr1	25436003	25436323
chr1	25563709	25564089
chr1	25844512	25844832
chr1	25912612	25912932
chr1	26804192	26804556
chr1	26910544	26910864
chr1	26947807	26948171
chr1	27019320	27019700
chr1	27147245	27147625
chr1	27383886	27384206
chr1	27986484	27986848
chr1	28431639	28431959
chr1	28576022	28576386
chr1	29457078	29457442
chr1	29683261	29683581
chr1	29867556	29867775
chr1	30122547	30122867
chr1	30147144	30147464
chr1	30462893	30463213
chr1	30463909	30464229
chr1	30660363	30660683
chr1	31158337	31158437
chr1	32352535	32352915
chr1	32907947	32908267
chr1	33077758	33078122
chr1	33084272	33084636
chr1	33458278	33458658
chr1	33510839	33511159
chr1	33592877	33593197
chr1	33595964	33596344
chr1	33717423	33717743
chr1	33768025	33768389
chr1	33858424	33858518
chr1	33891559	33891939
chr1	33903974	33904294
chr1	33967434	33967754
chr1	34944127	34944447
chr1	34997513	34997893
chr1	35695237	35695617
chr1	36335361	36335441
chr1	36600606	36600926
chr1	36662871	36663041
chr1	36867082	36867446
chr1	36877520	36877884
chr1	36979656	36979976
chr1	37216451	37216771
chr1	37565945	37566265
chr1	37875780	37875974
chr1	37984510	37984693
chr1	38618472	38618852
chr1	38639058	38639438
chr1	38712928	38713248
chr1	38941007	38941387
chr1	38955391	38955771
chr1	39210460	39210780
chr1	39211569	39211722
chr1	39419089	39419409
chr1	39443638	39443958
chr1	40067404	40067724
chr1	40076718	40076866
chr1	40077043	40077363
chr1	40143409	40143680
chr1	40707349	40707729
chr1	40904163	40904483
chr1	41023456	41023661
chr1	41145221	41145541
chr1	41410104	41410468
chr1	41731154	41731474
chr1	41862821	41862977
chr1	41928221	41928585
chr1	41967322	41967686
chr1	42835926	42836246
chr1	43382175	43382539
chr1	43486385	43486705
chr1	43572392	43572532
chr1	43977101	43977465
chr1	45259395	45259539
chr1	46009482	46009862
chr1	46251306	46251686
chr1	48224082	48224446
chr1	48535261	48535625
chr1	51643801	51644019
chr1	52000160	52000540
chr1	53822623	53822987
chr1	53857216	53857596
chr1	54469366	54469686
chr1	55008980	55009300
chr1	55431713	55431976
chr1	56582458	56582838
chr1	56797837	56798217
chr1	56957054	56957418
chr1	58717477	58717857
chr1	58910180	58910500
chr1	59036539	59036919
chr1	59089980	59090080
chr1	59207718	59208038
chr1	59474360	59474724
chr1	59756106	59756486
chr1	61062416	61062736
chr1	61352835	61353155
chr1	62700434	62700798
chr1	63219857	63220177
chr1	63227660	63227980
chr1	63420499	63420733
chr1	64159855	64160235
chr1	67614303	67614667
chr1	71107707	71107835
chr1	73719752	73720072
chr1	76445728	76446108
chr1	78455400	78455764
chr1	79655070	79655450
chr1	79910477	79910841
chr1	80026517	80026897
chr1	80088487	80088807
chr1	80518646	80518966
chr1	81049480	81049800
chr1	81927532	81927912
chr1	81927786	81928166
chr1	82080823	82081143
chr1	83350283	83350603
chr1	85368604	85368763
chr1	85769474	85769794
chr1	86989083	86989403
chr1	87896697	87896860
chr1	88051345	88051665
chr1	88101326	88101646
chr1	88292333	88292713
chr1	88836615	88836979
chr1	88867057	88867437
chr1	88933484	88933804
chr1	89593010	89593330
chr1	89978663	89978983
chr1	90449768	90450088
chr1	91272979	91273159
chr1	91546242	91546622
chr1	91586701	91587065
chr1	91601453	91601773
chr1	92086945	92087265
chr1	93473821	93474201
chr1	93507900	93508280
chr1	93907793	93908157
chr1	94837442	94837762
chr1	94844004	94844324
chr1	95743326	95743646
chr1	96003769	96004089
chr1	96613241	96613561
chr1	97045191	97045555
chr1	97156441	97156761
chr1	98863551	98863931
chr1	98963654	98964034
chr1	98966677	98967057
chr1	99337096	99337476
chr1	100247944	100248324
chr1	101046661	101047041
chr1	101178110	101178490
chr1	101756515	101756895
chr1	101758999	101759379
chr1	101823022	101823386
chr1	101845608	101845988
chr1	101873934	101874314
chr1	102699791	102700111
chr1	103124848	103125168
chr1	103126170	103126490
chr1	103209714	103210094
chr1	104930713	104931093
chr1	105249584	105249964
chr1	105302635	105303015
chr1	105475503	105475883
chr1	105640509	105640829
chr1	106500898	106501278
chr1	107588264	107588357
chr1	108617665	108618045
chr1	109094018	109094398
chr1	110004011	110004331
chr1	110179441	110179643
chr1	110191967	110192287
chr1	110938425	110938789
chr1	111269400	111269780
chr1	111764346	111764726
chr1	112010707	112011027
chr1	112012152	112012516
chr1	113437882	113438202
chr1	113438162	113438366
chr1	113446636	113446956
chr1	113448675	113448995
chr1	113527709	113528089
chr1	113825646	113825808
chr1	113846025	113846119
chr1	114880121	114880441
chr1	115067572	115067936
chr1	115345709	115346089
chr1	115641944	115642324
chr1	116688610	116688767
chr1	116840232	116840325
chr1	117337499	117337879
chr1	117880194	117880514
chr1	118250932	118251252
chr1	118729519	118729839
chr1	119018615	119018935
chr1	119190344	119190724
chr1	119877056	119877247
chr1	120213555	120213935
chr1	120218209	120218529
chr1	120322656	120323020
chr1	121251861	121252181
chr1	121255496	121255816
chr1	121315639	121316003
chr1	144017232	144017552
chr1	144017454	144017774
chr1	149224534	149224634
chr1	150135342	150135662
chr1	150137514	150137894
chr1	150185843	150186223
chr1	150872250	150872570
chr1	151808973	151809353
chr1	151914636	151914956
chr1	151917309	151917673
chr1	151939426	151939790
chr1	152983788	152984051
chr1	153458352	153458716
chr1	153494796	153495160
chr1	153571334	153571714
chr1	153763433	153763813
chr1	153763634	153764014
chr1	155043342	155043722
chr1	155044191	155044555
chr1	155620226	155620590
chr1	156426420	156426800
chr1	156426943	156427307
chr1	156475202	156475319
chr1	157209921	157210301
chr1	157415530	157415751
chr1	157527928	157528308
chr1	158147583	158147903
chr1	159177684	159178064
chr1	159722072	159722436
chr1	159837486	159837850
chr1	160430181	160430561
chr1	160509973	160510353
chr1	160647506	160647886
chr1	160751967	160752347
chr1	160759725	160760105
chr1	160759927	160760307
chr1	160879964	160880328
chr1	161220007	161220327
chr1	161449273	161449637
chr1	161708826	161709206
chr1	162403560	162403880
chr1	163892177	163892557
chr1	165893872	165894236
chr1	165935119	165935499
chr1	166311429	166311581
chr1	166311542	166311862
chr1	166847387	166847707
chr1	166847887	166848083
chr1	168139812	168140192
chr1	168355778	168356098
chr1	168504878	168505258
chr1	168526785	168527165
chr1	168541838	168542218
chr1	168568163	168568310
chr1	169637983	169638303
chr1	169864823	169865203
chr1	170219387	170219767
chr1	171197289	171197669
chr1	171350214	171350578
chr1	171359975	171360142
chr1	171360083	171360403
chr1	172772992	172773113
chr1	173191534	173191914
chr1	174025054	174025241
chr1	175256539	175256919
chr1	177288466	177288846
chr1	177294708	177295028
chr1	177818303	177818683
chr1	178579979	178580094
chr1	178944744	178945064
chr1	180478210	180478337
chr1	180578848	180579168
chr1	180580431	180580751
chr1	181333057	181333377
chr1	181905576	181905956
chr1	182646598	182646978
chr1	183129102	183129466
chr1	183574044	183574424
chr1	185290311	185290484
chr1	186975769	186976089
chr1	187042483	187042645
chr1	187386674	187387038
chr1	187444680	187445044
chr1	187482269	187482649
chr1	188206970	188207334
chr1	188226591	188226911
chr1	188232540	188232920
chr1	188827666	188827986
chr1	188858304	188858668
chr1	188866661	188867025
chr1	190866379	190866759
chr1	190949497	190949817
chr1	191312649	191312969
chr1	191664946	191665326
chr1	191905001	191905321
chr1	192467644	192467811
chr1	192499409	192499789
chr1	192720813	192721177
chr1	192864771	192865091
chr1	192880753	192881073
chr1	192932268	192932632
chr1	192956544	192956673
chr1	193448354	193448734
chr1	194013108	194013472
chr1	194202194	194202558
chr1	194278625	194279005
chr1	194399894	194400214
chr1	194586271	194586368
chr1	194586395	194586715
chr1	195024176	195024556
chr1	195110661	195110981
chr1	195691491	195691626
chr1	197038402	197038722
chr1	198076173	198076537
chr1	198076372	198076736
chr1	198082347	198082711
chr1	198095371	198095735
chr1	198105290	198105610
chr1	198373786	198374150
chr1	198567894	198568274
chr1	199141337	199141701
chr1	199753351	199753715
chr1	200231726	200232106
chr1	200395381	200395701
chr1	200700844	200701224
chr1	200854618	200854998
chr1	200854840	200855220
chr1	200997623	200997987
chr1	201423199	201423519
chr1	202007749	202008129
chr1	202036414	202036734
chr1	202054753	202055117
chr1	202074921	202075285
chr1	203240157	203240521
chr1	203258767	203259147
chr1	203290071	203290451
chr1	203290277	203290657
chr1	203291980	203292360
chr1	203294147	203294527
chr1	203394863	203395243
chr1	203520691	203521055
chr1	203541308	203541628
chr1	203582366	203582746
chr1	203869930	203870294
chr1	204462931	204463295
chr1	204532524	204532904
chr1	205257294	205257674
chr1	205720450	205720770
chr1	206676913	206677293
chr1	206842252	206842572
chr1	206913003	206913383
chr1	207069202	207069566
chr1	207189130	207189494
chr1	207478849	207479213
chr1	207479067	207479431
chr1	207544312	207544676
chr1	207919664	207920028
chr1	207921460	207921780
chr1	207987290	207987610
chr1	207997139	207997519
chr1	207999221	207999601
chr1	208001843	208002163
chr1	208661241	208661561
chr1	209215278	209215642
chr1	209573925	209574305
chr1	209846601	209846981
chr1	210031436	210031597
chr1	210061856	210062040
chr1	210071701	210071863
chr1	211394484	211394804
chr1	211402322	211402443
chr1	211733063	211733427
chr1	211779848	211779996
chr1	212063342	212063706
chr1	212332286	212332666
chr1	212410949	212411329
chr1	212429532	212429912
chr1	212817112	212817492
chr1	213104255	213104635
chr1	213901844	213902164
chr1	214449008	214449328
chr1	215567724	215567854
chr1	217519936	217520256
chr1	218637140	218637504
chr1	218889005	218889385
chr1	219401423	219401787
chr1	219584704	219585024
chr1	219957185	219957505
chr1	220477403	220477783
chr1	220517158	220517538
chr1	220541914	220542294
chr1	220621617	220621997
chr1	221189971	221190351
chr1	221407001	221407365
chr1	221488597	221488961
chr1	221749650	221750014
chr1	221791890	221792210
chr1	221949997	221950377
chr1	221966992	221967372
chr1	221967748	221968128
chr1	222165721	222166101
chr1	222221648	222222028
chr1	223213069	223213449
chr1	224539638	224539958
chr1	224935412	224935792
chr1	224985758	224986078
chr1	225619970	225620220
chr1	225887878	225888024
chr1	226084899	226085279
chr1	226158169	226158489
chr1	226192061	226192441
chr1	226613483	226613803
chr1	226637655	226637802
chr1	226652327	226652691
chr1	226952160	226952540
chr1	227096602	227096966
chr1	228308947	228309327
chr1	228573805	228574125
chr1	228622378	228622698
chr1	228910193	228910304
chr1	229972067	229972387
chr1	230001969	230002289
chr1	230182867	230183231
chr1	230863640	230863960
chr1	231424784	231424910
chr1	231424842	231425162
chr1	231453511	231453745
chr1	231566059	231566213
chr1	232449999	232450118
chr1	233079646	233080026
chr1	233531658	233532022
chr1	233595295	233595675
chr1	233656309	233656673
chr1	233742968	233743348
chr1	233860063	233860298
chr1	234659355	234659719
chr1	234660822	234661186
chr1	234738421	234738801
chr1	234918459	234918839
chr1	234977573	234977953
chr1	234987481	234987861
chr1	235001900	235002264
chr1	235078773	235079093
chr1	235106825	235107189
chr1	235116140	235116520
chr1	236447629	236448009
chr1	236451419	236451739
chr1	236517928	236518043
chr1	238018839	238019159
chr1	238433980	238434360
chr1	239418368	239418688
chr1	240087489	240087809
chr1	240140768	240141088
chr1	240926463	240926783
chr1	242853475	242853795
chr1	242937095	242937415
chr1	244232793	244233113
chr1	244465147	244465511
chr1	244488330	244488650
chr1	245316516	245316836
chr1	246862443	246862807
chr1	246960942	246961262
chr1	247523526	247523846
chr1	247550973	247551293
chr1	249157351	249157731
chr1	249167227	249167591
chr2	91377	91697
chr2	190873	191193
chr2	437973	438337
chr2	600874	601238
chr2	3487086	3487406
chr2	3906773	3907093
chr2	7009943	7010263
chr2	7936094	7936474
chr2	7966398	7966778
chr2	8548892	8549272
chr2	8617448	8617593
chr2	8628110	8628490
chr2	8748630	8749010
chr2	9319120	9319500
chr2	9826270	9826590
chr2	9878753	9879117
chr2	10146114	10146478
chr2	10223878	10224258
chr2	10232462	10232654
chr2	10260315	10260679
chr2	11667167	11667547
chr2	12074101	12074214
chr2	13281950	13282330
chr2	13447948	13448328
chr2	15013132	15013305
chr2	16864835	16865215
chr2	16894247	16894627
chr2	16910395	16910775
chr2	17375450	17375654
chr2	17580493	17580873
chr2	19673880	19674260
chr2	19925173	19925493
chr2	20305923	20306287
chr2	20323978	20324342
chr2	20778606	20778986
chr2	21052439	21052759
chr2	21478955	21479335
chr2	23603546	23603926
chr2	24626395	24626759
chr2	26139115	26139435
chr2	27037934	27038152
chr2	27043747	27044127
chr2	28600917	28601281
chr2	28670959	28671323
chr2	28696241	28696561
chr2	30361985	30362365
chr2	32029344	32029664
chr2	34001136	34001456
chr2	34022629	34022949
chr2	34088591	34088745
chr2	34367150	34367470
chr2	34657307	34657627
chr2	36915992	36916312
chr2	37416938	37417302
chr2	37549580	37549944
chr2	37553508	37553872
chr2	37782627	37783007
chr2	37785862	37786242
chr2	37845530	37845910
chr2	38119932	38120312
chr2	38120135	38120515
chr2	38490935	38491315
chr2	38624909	38625273
chr2	38682876	38683196
chr2	38760514	38760894
chr2	38869733	38870097
chr2	39351247	39351627
chr2	40899068	40899448
chr2	40973329	40973693
chr2	42220178	42220542
chr2	43058242	43058353
chr2	43421254	43421634
chr2	44394589	44394953
chr2	44498536	44498856
chr2	45060350	45060516
chr2	45225122	45225486
chr2	45241613	45241977
chr2	45358997	45359137
chr2	45400651	45401015
chr2	45494355	45494517
chr2	45867739	45868103
chr2	46489808	46489962
chr2	46688809	46689189
chr2	46721870	46722190
chr2	47090534	47090659
chr2	47882273	47882653
chr2	47951836	47952216
chr2	47993444	47993824
chr2	48192102	48192482
chr2	48625370	48625690
chr2	51663957	51664277
chr2	52006881	52007201
chr2	52371701	52372081
chr2	53713656	53714020
chr2	53821405	53821769
chr2	54308811	54309191
chr2	54649428	54649748
chr2	54649640	54649960
chr2	55360927	55361307
chr2	55717656	55718020
chr2	57562202	57562522
chr2	58488215	58488579
chr2	58676621	58677001
chr2	60674032	60674412
chr2	61035536	61035856
chr2	61920934	61921298
chr2	62084434	62084754
chr2	62376084	62376464
chr2	62412971	62413335
chr2	62515240	62515620
chr2	62571758	62572138
chr2	62611005	62611385
chr2	62762678	62762998
chr2	62806377	62806757
chr2	63305943	63306263
chr2	64028546	64028866
chr2	64396087	64396467
chr2	64519611	64519991
chr2	64690911	64691291
chr2	64711388	64711516
chr2	64925505	64925885
chr2	64998937	64999301
chr2	65067018	65067398
chr2	65663594	65663958
chr2	65727468	65727788
chr2	65750113	65750433
chr2	65809615	65809804
chr2	68643970	68644350
chr2	68942432	68942752
chr2	69666715	69667079
chr2	70359786	70360166
chr2	70376333	70376653
chr2	70587984	70588348
chr2	70787670	70787849
chr2	71318958	71319278
chr2	72314536	72314646
chr2	73061594	73061914
chr2	73481028	73481348
chr2	74152219	74152539
chr2	74912495	74912859
chr2	75172274	75172654
chr2	75438637	75438757
chr2	75539083	75539463
chr2	75939433	75939753
chr2	77818287	77818667
chr2	77884675	77885055
chr2	79006667	79006987
chr2	79052277	79052657
chr2	79204812	79205192
chr2	81058036	81058416
chr2	82630024	82630404
chr2	83007278	83007642
chr2	83164964	83165284
chr2	83212329	83212649
chr2	83216012	83216392
chr2	83404656	83405020
chr2	84355030	84355253
chr2	84512305	84512625
chr2	85147332	85147712
chr2	85166534	85166914
chr2	85560853	85560983
chr2	85665074	85665438
chr2	85964677	85965041
chr2	86155852	86156216
chr2	86625121	86625501
chr2	88958981	88959345
chr2	95678841	95679221
chr2	95688746	95689126
chr2	97257269	97257589
chr2	97680278	97680470
chr2	98325105	98325469
chr2	98620502	98620866
chr2	98643429	98643809
chr2	99782074	99782454
chr2	101852789	101852937
chr2	101888917	101889297
chr2	102239464	102239844
chr2	102291903	102292283
chr2	104233043	104233363
chr2	106071999	106072363
chr2	106338073	106338393
chr2	106949993	106950150
chr2	107201610	107201770
chr2	108009398	108009718
chr2	108085330	108085423
chr2	108152115	108152435
chr2	108370320	108370476
chr2	108370465	108370785
chr2	108648577	108648957
chr2	110417610	110417974
chr2	111958221	111958601
chr2	111966768	111967148
chr2	111976898	111977278
chr2	111977447	111977827
chr2	112380384	112380748
chr2	113377580	113377900
chr2	113484351	113484731
chr2	113836104	113836468
chr2	113913996	113914147
chr2	114457651	114458031
chr2	114461617	114461937
chr2	114965003	114965323
chr2	117828479	117828799
chr2	118136263	118136643
chr2	118807446	118807826
chr2	118881495	118881859
chr2	118954795	118955175
chr2	119447167	119447276
chr2	119454360	119454724
chr2	119641497	119641658
chr2	119960495	119960875
chr2	120462443	120462823
chr2	120464702	120464955
chr2	120755253	120755403
chr2	121067792	121068172
chr2	121309114	121309494
chr2	121366936	121367256
chr2	121776273	121776593
chr2	122561930	122562310
chr2	123097871	123098251
chr2	123238808	123239188
chr2	123396761	123397141
chr2	123498587	123498967
chr2	125685502	125685822
chr2	125744557	125744713
chr2	126236165	126236485
chr2	126388959	126389339
chr2	126422610	126422930
chr2	126486171	126486491
chr2	127751823	127752143
chr2	127783095	127783475
chr2	127886023	127886403
chr2	127904023	127904387
chr2	128811369	128811611
chr2	129455285	129455605
chr2	129490533	129490913
chr2	129640989	129641309
chr2	129660756	129661136
chr2	129763713	129763908
chr2	130635009	130635329
chr2	132724362	132724682
chr2	134866396	134866573
chr2	134877258	134877638
chr2	134888332	134888652
chr2	134946526	134946890
chr2	135497581	135497961
chr2	135553989	135554309
chr2	135561627	135561856
chr2	136646304	136646466
chr2	136845142	136845344
chr2	136889569	136889949
chr2	136912009	136912329
chr2	136965774	136966154
chr2	137063151	137063531
chr2	137139789	137139913
chr2	138584316	138584696
chr2	139011478	139011798
chr2	139233176	139233556
chr2	139250953	139251273
chr2	140168401	140168562
chr2	140501588	140501968
chr2	143506249	143506569
chr2	143623479	143623859
chr2	147638692	147639012
chr2	147891126	147891490
chr2	147907894	147908258
chr2	148257488	148257868
chr2	148585197	148585517
chr2	150961888	150962208
chr2	150962096	150962416
chr2	151027169	151027316
chr2	152153258	152153578
chr2	154375711	154376091
chr2	154399990	154400354
chr2	155471084	155471464
chr2	157198197	157198577
chr2	157529738	157530102
chr2	158309796	158310176
chr2	158811692	158812012
chr2	158823965	158824285
chr2	159600356	159600676
chr2	160148744	160149064
chr2	160952959	160953339
chr2	161075694	161076058
chr2	161783827	161784207
chr2	161789658	161790022
chr2	161941915	161942019
chr2	162407731	162408111
chr2	164261866	164262246
chr2	164306807	164307187
chr2	164871939	164872319
chr2	167468094	167468474
chr2	167595098	167595478
chr2	167600485	167600865
chr2	168149394	168149515
chr2	169173832	169174152
chr2	169286618	169286998
chr2	169890885	169891205
chr2	169974567	169974887
chr2	171771370	171771499
chr2	172370270	172370590
chr2	173113993	173114357
chr2	173231838	173232158
chr2	173503290	173503610
chr2	173551028	173551348
chr2	174166294	174166643
chr2	174214028	174214408
chr2	174683021	174683341
chr2	174757035	174757415
chr2	174924142	174924462
chr2	175357804	175358184
chr2	175360364	175360744
chr2	175412809	175413129
chr2	175573649	175573808
chr2	176052060	176052440
chr2	176087221	176087601
chr2	176121170	176121370
chr2	176486690	176486829
chr2	177270273	177270653
chr2	177329913	177330293
chr2	177427109	177427473
chr2	177628437	177628817
chr2	177796227	177796607
chr2	177799000	177799320
chr2	177845408	177845788
chr2	177873312	177873484
chr2	180990458	180990624
chr2	182009928	182010248
chr2	182010127	182010447
chr2	182555631	182555951
chr2	182674031	182674395
chr2	183473765	183474085
chr2	184240714	184241078
chr2	184303268	184303648
chr2	184372330	184372710
chr2	184377491	184377871
chr2	184757887	184758207
chr2	184869826	184870206
chr2	185837566	185837886
chr2	185997990	185998310
chr2	186981502	186981882
chr2	187827645	187827965
chr2	188817194	188817514
chr2	189808467	189808847
chr2	190075504	190075868
chr2	190465721	190466085
chr2	190523583	190523903
chr2	190869833	190870153
chr2	191443396	191443760
chr2	191471931	191472295
chr2	191560618	191560998
chr2	191586752	191587132
chr2	191625191	191625511
chr2	192298853	192299173
chr2	192476402	192476782
chr2	192531517	192531897
chr2	192573291	192573671
chr2	192787850	192788230
chr2	193409060	193409424
chr2	193643564	193643884
chr2	193823351	193823731
chr2	193823550	193823930
chr2	194367276	194367596
chr2	194866748	194867068
chr2	195041650	195041970
chr2	196358308	196358394
chr2	196381159	196381310
chr2	196411507	196411827
chr2	196966187	196966567
chr2	197612406	197612726
chr2	198235960	198236130
chr2	198315635	198315999
chr2	199687942	199688322
chr2	199734321	199734701
chr2	199778425	199778805
chr2	200569324	200569644
chr2	201083349	201083669
chr2	201160340	201160720
chr2	201167604	201167968
chr2	202779331	202779711
chr2	203439943	203440263
chr2	204506870	204507190
chr2	205004697	205005077
chr2	205099712	205099835
chr2	206699518	206699898
chr2	206739115	206739435
chr2	206842502	206842822
chr2	207287906	207288270
chr2	207802410	207802790
chr2	208259433	208259797
chr2	208288755	208289135
chr2	208307466	208307786
chr2	208898829	208899193
chr2	208929044	208929424
chr2	209092047	209092367
chr2	209810738	209810830
chr2	210245051	210245431
chr2	210864709	210864923
chr2	211599638	211600018
chr2	213585043	213585423
chr2	213770395	213770759
chr2	213824418	213824798
chr2	215582422	215582742
chr2	216084467	216084787
chr2	216768780	216769144
chr2	216778734	216778964
chr2	216778870	216779250
chr2	216883522	216883902
chr2	217356464	217356844
chr2	217750530	217750894
chr2	218651436	218651816
chr2	218663815	218664195
chr2	218973522	218973842
chr2	218986620	218986753
chr2	219270983	219271347
chr2	220065590	220065910
chr2	220178207	220178374
chr2	220549814	220550194
chr2	221818580	221818900
chr2	223250191	223250571
chr2	223597591	223597911
chr2	223707714	223707889
chr2	223965951	223966331
chr2	224475855	224476175
chr2	224948963	224949327
chr2	225016398	225016762
chr2	225039816	225040006
chr2	225232678	225232998
chr2	225467826	225467935
chr2	225521251	225521358
chr2	226609375	226609695
chr2	227050309	227050673
chr2	227513461	227513781
chr2	228279562	228279926
chr2	228661177	228661353
chr2	229477991	229478355
chr2	230988943	230989263
chr2	231278268	231278588
chr2	231521503	231521883
chr2	231821531	231821911
chr2	231828293	231828613
chr2	231834046	231834426
chr2	231893698	231893856
chr2	232545019	232545383
chr2	232545746	232546110
chr2	232578457	232578821
chr2	232585346	232585726
chr2	232726283	232726603
chr2	232756223	232756543
chr2	232803770	232804134
chr2	234126461	234126781
chr2	234146493	234146813
chr2	234764852	234765172
chr2	234932336	234932656
chr2	235156960	235157163
chr2	235534533	235534897
chr2	235790254	235790618
chr2	236070746	236071110
chr2	237453950	237454330
chr2	238067571	238067951
chr2	238465656	238466036
chr2	239565225	239565545
chr2	239631127	239631279
chr2	239631249	239631569
chr2	241595680	241596060
chr3	577193	577557
chr3	3318334	3318714
chr3	3645849	3646229
chr3	3670723	3671103
chr3	3756230	3756610
chr3	5031063	5031383
chr3	5039323	5039703
chr3	5050319	5050639
chr3	5128832	5129212
chr3	5227940	5228320
chr3	5700823	5701008
chr3	5936600	5936980
chr3	6168875	6169255
chr3	6170271	6170591
chr3	6448844	6448956
chr3	7832059	7832379
chr3	9006547	9006911
chr3	9009267	9009587
chr3	9659885	9660205
chr3	10177546	10177910
chr3	10744715	10745035
chr3	11103491	11103855
chr3	11103713	11104077
chr3	11112254	11112618
chr3	11116799	11116941
chr3	11116959	11117323
chr3	11136333	11136697
chr3	11793730	11794094
chr3	11959659	11960023
chr3	12003373	12003693
chr3	12031119	12031439
chr3	12761527	12761907
chr3	12925038	12925268
chr3	13130541	13130627
chr3	13185061	13185176
chr3	13497344	13497473
chr3	14246546	14246728
chr3	14377718	14378082
chr3	14622843	14623207
chr3	14830209	14830573
chr3	15403131	15403511
chr3	15689287	15689667
chr3	15940973	15941134
chr3	15983091	15983455
chr3	16005459	16005614
chr3	16118601	16118921
chr3	16118818	16119138
chr3	16816070	16816172
chr3	16861837	16862217
chr3	16890773	16891153
chr3	17784217	17784597
chr3	17815921	17816079
chr3	17823240	17823560
chr3	17850665	17850793
chr3	17858406	17858601
chr3	18574495	18574875
chr3	19581962	19582342
chr3	19584689	19585069
chr3	19744832	19744914
chr3	20311074	20311265
chr3	20317211	20317531
chr3	21371823	21372203
chr3	21427926	21428246
chr3	23045128	23045492
chr3	23695328	23695708
chr3	23753685	23754065
chr3	25893997	25894140
chr3	27004531	27004851
chr3	27722959	27723323
chr3	27833384	27833764
chr3	28095181	28095545
chr3	28149883	28150263
chr3	28241293	28241454
chr3	28259909	28260289
chr3	29297619	29297983
chr3	31006104	31006484
chr3	31026936	31027300
chr3	31048133	31048513
chr3	31252329	31252709
chr3	31268720	31269100
chr3	31503513	31503893
chr3	31528362	31528450
chr3	31556980	31557360
chr3	31562954	31563274
chr3	31565341	31565721
chr3	32124336	32124700
chr3	32227694	32228014
chr3	32415343	32415663
chr3	32620789	32621153
chr3	32668032	32668189
chr3	32715283	32715647
chr3	32982120	32982246
chr3	33487983	33488102
chr3	34115456	34115836
chr3	34197217	34197597
chr3	34346426	34346746
chr3	34560460	34560780
chr3	35510342	35510722
chr3	36189645	36190009
chr3	36676316	36676636
chr3	36743573	36743953
chr3	37275046	37275366
chr3	38480324	38480422
chr3	38487602	38487966
chr3	39091385	39091765
chr3	39329997	39330130
chr3	39363046	39363366
chr3	39500114	39500321
chr3	39819739	39819922
chr3	39819883	39820203
chr3	39844107	39844245
chr3	40805315	40805679
chr3	41013205	41013585
chr3	41013406	41013786
chr3	41103545	41103662
chr3	41158962	41159342
chr3	42268584	42268904
chr3	42492263	42492583
chr3	43775293	43775657
chr3	43805510	43805890
chr3	44087434	44087814
chr3	44101664	44102044
chr3	44214317	44214506
chr3	44276304	44276624
chr3	44585291	44585392
chr3	44592099	44592419
chr3	45348928	45349292
chr3	45387365	45387729
chr3	46109598	46109978
chr3	46254608	46254988
chr3	48312740	48313104
chr3	49827600	49827980
chr3	51832620	51832984
chr3	51884010	51884153
chr3	51890318	51890638
chr3	51922546	51922866
chr3	52025244	52025411
chr3	52274317	52274697
chr3	52278204	52278584
chr3	55203295	55203514
chr3	55230654	55230788
chr3	55373962	55374091
chr3	56726551	56726931
chr3	57945951	57946119
chr3	58170337	58170657
chr3	58200596	58200976
chr3	58694881	58695000
chr3	59247916	59248296
chr3	59360482	59360862
chr3	59392571	59392951
chr3	59497213	59497533
chr3	59541873	59542193
chr3	59586362	59586742
chr3	61480581	61480961
chr3	61506995	61507305
chr3	62940317	62940697
chr3	63765009	63765389
chr3	63780606	63780926
chr3	64500585	64500905
chr3	65160419	65160739
chr3	66594520	66594840
chr3	66702509	66702829
chr3	66719417	66719737
chr3	66860009	66860373
chr3	66907016	66907396
chr3	69488784	69489164
chr3	69504284	69504484
chr3	69710249	69710569
chr3	69768071	69768391
chr3	70382311	70382515
chr3	70661854	70661949
chr3	72031812	72032192
chr3	72034088	72034468
chr3	72067683	72067784
chr3	72509006	72509326
chr3	72515094	72515474
chr3	72548128	72548448
chr3	72587502	72587882
chr3	72600000	72600380
chr3	72644837	72645157
chr3	72663095	72663415
chr3	72713356	72713720
chr3	72772630	72773010
chr3	72773205	72773569
chr3	73202172	73202492
chr3	73208622	73208707
chr3	73994686	73995066
chr3	75229490	75229870
chr3	75229697	75230077
chr3	75358409	75358729
chr3	75493044	75493364
chr3	76673364	76673744
chr3	81229832	81230152
chr3	81230700	81231020
chr3	81231758	81232138
chr3	82196290	82196670
chr3	82278469	82278849
chr3	83983513	83983877
chr3	84116106	84116486
chr3	86332118	86332498
chr3	86781903	86782283
chr3	87723773	87724153
chr3	88238608	88238988
chr3	88435945	88436325
chr3	94067148	94067468
chr3	94973565	94973929
chr3	95297977	95298341
chr3	95440777	95441157
chr3	95670014	95670394
chr3	96021357	96021737
chr3	96364929	96365309
chr3	98164853	98165233
chr3	98257338	98257702
chr3	98276203	98276583
chr3	98319361	98319741
chr3	98691651	98692015
chr3	101584981	101585345
chr3	101757253	101757633
chr3	102210701	102211021
chr3	103446602	103446966
chr3	104119445	104119825
chr3	104237791	104238171
chr3	105724791	105725155
chr3	105807874	105808254
chr3	105868235	105868555
chr3	106064236	106064600
chr3	106144921	106145285
chr3	106717678	106718058
chr3	110971650	110971919
chr3	111174640	111174960
chr3	111735897	111736261
chr3	112085561	112085941
chr3	112488959	112489323
chr3	114879218	114879598
chr3	114903326	114903646
chr3	115502722	115503086
chr3	117272207	117272587
chr3	117328002	117328382
chr3	117989122	117989442
chr3	118459603	118459983
chr3	118524145	118524525
chr3	118976891	118977271
chr3	119419384	119419764
chr3	120009119	120009439
chr3	121749268	121749425
chr3	122235850	122236170
chr3	125323231	125323551
chr3	125351966	125352286
chr3	125391391	125391521
chr3	125476897	125477217
chr3	126766260	126766580
chr3	126794490	126794810
chr3	127167115	127167435
chr3	127188666	127188986
chr3	127205130	127205494
chr3	127632808	127633172
chr3	127797222	127797542
chr3	128131857	128132033
chr3	128134174	128134538
chr3	128298747	128299067
chr3	128372858	128373222
chr3	128786557	128786921
chr3	128788278	128788598
chr3	128952451	128952831
chr3	129254927	129255247
chr3	129655760	129655930
chr3	129730057	129730377
chr3	130265397	130265717
chr3	130532829	130533149
chr3	131115098	131115462
chr3	132115549	132115913
chr3	133249530	133249629
chr3	133451146	133451510
chr3	134431982	134432362
chr3	135017623	135018003
chr3	135232644	135232964
chr3	135497982	135498137
chr3	135634088	135634408
chr3	136884021	136884341
chr3	137051230	137051610
chr3	137432913	137433074
chr3	137665961	137666325
chr3	137707851	137708231
chr3	138551685	138551845
chr3	138553618	138553998
chr3	138906526	138906846
chr3	139485796	139486116
chr3	140435230	140435610
chr3	140561921	140562301
chr3	140562462	140562842
chr3	140591203	140591357
chr3	140597439	140597590
chr3	140736153	140736473
chr3	141347094	141347458
chr3	141351971	141352291
chr3	141447407	141447771
chr3	141553111	141553475
chr3	141991315	141991679
chr3	142305683	142306047
chr3	142611533	142611897
chr3	142613425	142613745
chr3	143569041	143569421
chr3	143747891	143748271
chr3	144545214	144545594
chr3	144628457	144628777
chr3	145051658	145051978
chr3	146215685	146216049
chr3	146490648	146491028
chr3	146872472	146872792
chr3	146962897	146963093
chr3	147960431	147960795
chr3	147997789	147998109
chr3	148036897	148037277
chr3	148171994	148172358
chr3	148335517	148335897
chr3	148827823	148827908
chr3	148942952	148943332
chr3	148963462	148963826
chr3	150090652	150091016
chr3	150102660	150102980
chr3	150451289	150451472
chr3	150489477	150489797
chr3	151178568	151178932
chr3	151838779	151839143
chr3	151870935	151871255
chr3	151915721	151916101
chr3	151935931	151936032
chr3	151954627	151954991
chr3	151975607	151975987
chr3	152209641	152210021
chr3	152219214	152219333
chr3	152219308	152219628
chr3	152277506	152277826
chr3	152454869	152455249
chr3	152508101	152508421
chr3	152999387	152999707
chr3	152999597	152999917
chr3	153087123	153087214
chr3	153685101	153685481
chr3	154606434	154606636
chr3	154741175	154741495
chr3	155759772	155759993
chr3	155770457	155770777
chr3	155791725	155791852
chr3	155817875	155818049
chr3	156327721	156328101
chr3	156351169	156351489
chr3	156458825	156459145
chr3	157645237	157645557
chr3	158360605	158360925
chr3	158668143	158668282
chr3	160291232	160291552
chr3	160452978	160453342
chr3	162054659	162055023
chr3	162420027	162420407
chr3	162561813	162562133
chr3	163217530	163217710
chr3	163261742	163262106
chr3	163269700	163270020
chr3	163449358	163449722
chr3	163897581	163897961
chr3	164536738	164537118
chr3	165157631	165158011
chr3	165975660	165975980
chr3	166001671	166002035
chr3	166036429	166036749
chr3	166153406	166153770
chr3	169658156	169658536
chr3	169751358	169751722
chr3	170045838	170046202
chr3	170068374	170068754
chr3	170073120	170073484
chr3	170160927	170161291
chr3	171673451	171673679
chr3	172337659	172338039
chr3	176920887	176921008
chr3	176921030	176921410
chr3	176929694	176930058
chr3	176945698	176946062
chr3	176988789	176989109
chr3	177144801	177145181
chr3	177525936	177526256
chr3	178066990	178067185
chr3	178067175	178067495
chr3	178806114	178806478
chr3	178864725	178865105
chr3	179027102	179027482
chr3	179064096	179064476
chr3	181650078	181650458
chr3	182048428	182048808
chr3	182434976	182435356
chr3	182447853	182448233
chr3	182820990	182821354
chr3	182833733	182834053
chr3	183828123	183828487
chr3	184875218	184875582
chr3	185569721	185570085
chr3	185660883	185661203
chr3	186240927	186241106
chr3	186463800	186464164
chr3	188865844	188866224
chr3	189073464	189073828
chr3	189281700	189282080
chr3	189314289	189314609
chr3	189646006	189646370
chr3	189653314	189653678
chr3	189653516	189653880
chr3	189900870	189901234
chr3	190072171	190072551
chr3	190395645	190396009
chr3	190690604	190690968
chr3	190903180	190903544
chr3	192653141	192653521
chr3	192656559	192656939
chr3	193559767	193560147
chr3	193615061	193615381
chr3	193628514	193628834
chr3	193836798	193837118
chr3	193974888	193975208
chr3	194561219	194561583
chr3	195292664	195292818
chr3	195648198	195648518
chr3	195838856	195839236
chr3	195844741	195845121
chr3	195910341	195910721
chr3	196325414	196325549
chr3	196326624	196326944
chr3	196359070	196359434
chr3	196411881	196412261
chr3	197228385	197228705
chr4	51686	52066
chr4	767942	768123
chr4	1574355	1574675
chr4	1774992	1775312
chr4	2764477	2764841
chr4	2787318	2787698
chr4	3048008	3048388
chr4	3049489	3049869
chr4	3304067	3304447
chr4	3657843	3658163
chr4	3758207	3758403
chr4	3818953	3819273
chr4	3966047	3966427
chr4	4117611	4117931
chr4	4350477	4350797
chr4	4752030	4752195
chr4	4764793	4765173
chr4	5508381	5508761
chr4	6310210	6310574
chr4	6646887	6647251
chr4	6732615	6732935
chr4	8497541	8497861
chr4	8854981	8855345
chr4	9145793	9146113
chr4	9411216	9411536
chr4	9681928	9682248
chr4	9806740	9807120
chr4	10956416	10956796
chr4	11514713	11515077
chr4	11587161	11587525
chr4	11633988	11634352
chr4	14170607	14170987
chr4	14784505	14784885
chr4	14898826	14899190
chr4	15734727	15735047
chr4	15752807	15753127
chr4	15775672	15776036
chr4	15917148	15917528
chr4	16429890	16430270
chr4	17415273	17415593
chr4	17432187	17432507
chr4	17437805	17437955
chr4	18106722	18107102
chr4	18160345	18160665
chr4	18414781	18415161
chr4	18419485	18419621
chr4	19137637	19137787
chr4	19758605	19758969
chr4	22636919	22637065
chr4	24324283	24324647
chr4	24331685	24332049
chr4	24600483	24600803
chr4	25292995	25293315
chr4	25615263	25615583
chr4	25971130	25971223
chr4	26065184	26065504
chr4	26127956	26128336
chr4	26795456	26795654
chr4	27723132	27723512
chr4	28304677	28304997
chr4	28711231	28711595
chr4	28830339	28830659
chr4	29049624	29049944
chr4	31261193	31261573
chr4	31321397	31321777
chr4	31998887	31999078
chr4	32523436	32523816
chr4	33514006	33514386
chr4	34337000	34337095
chr4	34515238	34515618
chr4	35698875	35699255
chr4	37074923	37075303
chr4	37800999	37801379
chr4	38162131	38162406
chr4	38184866	38185018
chr4	38308123	38308503
chr4	38325899	38326263
chr4	38327142	38327506
chr4	38763273	38763653
chr4	38819865	38820245
chr4	40299232	40299596
chr4	40309973	40310353
chr4	40372553	40372917
chr4	40398069	40398275
chr4	40675044	40675183
chr4	40720971	40721351
chr4	42181341	42181661
chr4	42268616	42268996
chr4	42316787	42317107
chr4	42371935	42372255
chr4	42375796	42376116
chr4	43848645	43849025
chr4	44018545	44018714
chr4	45458377	45458757
chr4	45521916	45522296
chr4	45544502	45544822
chr4	47483149	47483529
chr4	48049147	48049527
chr4	48273249	48273629
chr4	48830277	48830430
chr4	48932805	48932901
chr4	53402054	53402198
chr4	53530717	53531097
chr4	54482413	54482793
chr4	54571573	54571953
chr4	55014932	55015252
chr4	55015134	55015454
chr4	55020602	55020922
chr4	55499207	55499361
chr4	55771162	55771482
chr4	55860310	55860630
chr4	56108367	56108687
chr4	56260110	56260490
chr4	56418136	56418391
chr4	56419612	56419992
chr4	56623747	56624111
chr4	57628965	57629345
chr4	58133795	58134115
chr4	58542402	58542722
chr4	58595223	58595603
chr4	58834092	58834412
chr4	58991149	58991469
chr4	59324129	59324449
chr4	59331889	59332209
chr4	60414170	60414550
chr4	60907287	60907667
chr4	63297799	63297891
chr4	63689159	63689479
chr4	64018843	64019223
chr4	64446849	64447229
chr4	66690838	66691202
chr4	68018267	68018423
chr4	68140496	68140610
chr4	68147992	68148312
chr4	68151845	68151955
chr4	68761703	68761870
chr4	69239284	69239664
chr4	70332417	70332737
chr4	70690287	70690667
chr4	71987288	71987608
chr4	72535379	72535699
chr4	72723565	72723885
chr4	73743527	73743697
chr4	74191590	74191954
chr4	74371239	74371619
chr4	75201318	75201698
chr4	75264318	75264501
chr4	75669589	75669909
chr4	75983119	75983439
chr4	76176810	76177190
chr4	78114633	78114832
chr4	78911232	78911375
chr4	79545192	79545572
chr4	79654006	79654326
chr4	81224437	81224817
chr4	81224682	81225062
chr4	82502277	82502495
chr4	82556837	82557217
chr4	82694824	82694944
chr4	83206001	83206381
chr4	83255092	83255412
chr4	83260138	83260458
chr4	83337129	83337294
chr4	84045376	84045756
chr4	85420486	85420806
chr4	85586442	85586762
chr4	87465408	87465788
chr4	87469061	87469160
chr4	87824811	87824964
chr4	88784174	88784494
chr4	89282477	89282658
chr4	89291727	89291938
chr4	89374065	89374429
chr4	90280256	90280620
chr4	90373947	90374311
chr4	90601263	90601643
chr4	92569965	92570345
chr4	92719571	92719951
chr4	94801119	94801499
chr4	95091472	95091792
chr4	97047129	97047449
chr4	97443065	97443385
chr4	97553459	97553779
chr4	98103191	98103571
chr4	98472091	98472471
chr4	99616063	99616239
chr4	99668546	99668654
chr4	99914034	99914194
chr4	100276936	100277316
chr4	100325683	100326063
chr4	100325882	100326262
chr4	101095420	101095800
chr4	101940032	101940412
chr4	102552269	102552649
chr4	103156269	103156589
chr4	103170783	103171103
chr4	103360333	103360697
chr4	103405170	103405490
chr4	104858825	104859205
chr4	105266036	105266416
chr4	105887869	105888249
chr4	105981751	105982131
chr4	105982846	105983226
chr4	106280287	106280607
chr4	107446035	107446155
chr4	110479342	110479706
chr4	111232051	111232431
chr4	112970337	112970717
chr4	112979680	112980044
chr4	113144296	113144453
chr4	113208348	113208728
chr4	113209462	113209842
chr4	113445378	113445758
chr4	114693893	114694273
chr4	114936530	114936894
chr4	116100098	116100418
chr4	116599057	116599377
chr4	116702940	116703320
chr4	119187197	119187577
chr4	119313708	119314028
chr4	121414798	121415118
chr4	121439182	121439546
chr4	122910915	122911123
chr4	122924438	122924802
chr4	123025395	123025715
chr4	123483664	123484028
chr4	123611184	123611564
chr4	124334349	124334729
chr4	124355967	124356287
chr4	124410095	124410218
chr4	124459965	124460285
chr4	124505380	124505760
chr4	124510444	124510824
chr4	125572283	125572405
chr4	126113710	126114030
chr4	126235891	126236044
chr4	126572493	126572619
chr4	127121935	127122255
chr4	127176831	127177151
chr4	127656643	127656773
chr4	127794868	127795188
chr4	127843682	127843841
chr4	127843910	127844074
chr4	128418383	128418703
chr4	129280102	129280422
chr4	129541652	129541813
chr4	129594467	129594632
chr4	129663027	129663204
chr4	130949742	130950122
chr4	131011967	131012287
chr4	131123974	131124294
chr4	132269484	132269864
chr4	133045280	133045660
chr4	133097541	133097861
chr4	134191361	134191725
chr4	135423368	135423688
chr4	135827634	135828014
chr4	135868589	135868969
chr4	136694550	136694870
chr4	136695861	136696241
chr4	137020296	137020616
chr4	137205217	137205537
chr4	137317304	137317415
chr4	137515696	137516076
chr4	138143987	138144307
chr4	138342762	138343082
chr4	138461540	138461920
chr4	138775195	138775277
chr4	139180929	139181293
chr4	139592741	139593061
chr4	139598997	139599377
chr4	139700282	139700602
chr4	139819050	139819414
chr4	139840300	139840620
chr4	140135170	140135534
chr4	140424845	140425225
chr4	142267904	142268268
chr4	142371606	142371970
chr4	142404814	142405194
chr4	142526077	142526397
chr4	142537133	142537259
chr4	144002901	144003281
chr4	144647974	144648159
chr4	146220794	146221174
chr4	151952932	151953252
chr4	152157929	152158249
chr4	152274579	152274943
chr4	152719059	152719423
chr4	152804873	152805253
chr4	153104684	153105004
chr4	153461504	153461884
chr4	153630923	153631287
chr4	154059400	154059720
chr4	154262854	154263174
chr4	154687025	154687345
chr4	154727881	154728041
chr4	156360973	156361353
chr4	157239064	157239444
chr4	158743301	158743665
chr4	158839470	158839850
chr4	159578964	159579067
chr4	159998671	159999051
chr4	160040299	160040679
chr4	160172905	160173035
chr4	160336487	160336807
chr4	160342205	160342525
chr4	160789736	160789841
chr4	161807252	161807632
chr4	162198975	162199355
chr4	163314139	163314519
chr4	163521417	163521797
chr4	163661414	163661734
chr4	163757387	163757707
chr4	164190291	164190611
chr4	164349480	164349601
chr4	165788277	165788657
chr4	165851465	165851785
chr4	166719834	166720154
chr4	167402238	167402618
chr4	169409072	169409436
chr4	169956181	169956501
chr4	171013211	171013346
chr4	171048434	171048754
chr4	171994419	171994739
chr4	172220046	172220366
chr4	174280493	174280659
chr4	174638417	174638737
chr4	175473216	175473536
chr4	175475992	175476356
chr4	176013870	176014250
chr4	177397449	177397769
chr4	177400974	177401354
chr4	178417264	178417584
chr4	178421294	178421413
chr4	178527533	178527853
chr4	179152230	179152550
chr4	179374894	179375274
chr4	180199831	180200211
chr4	180233050	180233430
chr4	180529357	180529737
chr4	184355082	184355221
chr4	184385272	184385636
chr4	184403280	184403600
chr4	184646865	184647082
chr4	184667072	184667392
chr4	184668136	184668516
chr4	185174821	185174978
chr4	185231323	185231703
chr4	185251092	185251472
chr4	185303378	185303626
chr4	185513643	185513963
chr4	185663346	185663499
chr4	185836186	185836506
chr4	186494999	186495363
chr4	187680454	187680774
chr4	187686962	187687134
chr4	187811962	187812183
chr4	189100744	189101108
chr4	189676500	189676820
chr4	190158006	190158326
chr4	190535882	190536202
chr4	190600243	190600563
chr4	190616187	190616507
chr4	190727780	190727891
chr5	544027	544407
chr5	545171	545491
chr5	559448	559828
chr5	1117715	1118035
chr5	1313145	1313525
chr5	1789430	1789750
chr5	2854510	2854874
chr5	3114824	3114936
chr5	3802190	3802429
chr5	5025956	5026336
chr5	5335186	5335550
chr5	5932843	5933163
chr5	6084468	6084848
chr5	8186001	8186365
chr5	10066253	10066573
chr5	10187607	10187927
chr5	10315974	10316294
chr5	10348178	10348542
chr5	10509160	10509524
chr5	10543661	10544025
chr5	10562312	10562692
chr5	13249787	13250151
chr5	13664651	13665015
chr5	13992998	13993378
chr5	14011263	14011627
chr5	14061203	14061567
chr5	14578006	14578370
chr5	14914350	14914670
chr5	15010979	15011343
chr5	15073560	15073924
chr5	16447035	16447399
chr5	16957451	16957815
chr5	16985307	16985671
chr5	16990605	16990685
chr5	17032100	17032243
chr5	17062969	17063289
chr5	17311463	17311613
chr5	17341045	17341310
chr5	17895638	17896002
chr5	18688272	18688636
chr5	18746337	18746717
chr5	19142466	19142586
chr5	20009152	20009516
chr5	20613126	20613446
chr5	21044888	21045208
chr5	21342052	21342372
chr5	21701379	21701743
chr5	23267114	23267478
chr5	23284347	23284711
chr5	23402700	23403064
chr5	23446619	23446983
chr5	23466621	23466985
chr5	23931128	23931492
chr5	24144207	24144571
chr5	24236523	24236887
chr5	24252426	24252790
chr5	24291725	24292089
chr5	24387253	24387573
chr5	25437303	25437667
chr5	25876127	25876447
chr5	26633621	26633985
chr5	27120603	27120923
chr5	27208527	27208891
chr5	27462991	27463355
chr5	27553449	27553813
chr5	27947213	27947577
chr5	28077025	28077345
chr5	28152087	28152451
chr5	28223608	28223972
chr5	28382027	28382391
chr5	28417932	28418296
chr5	28615459	28615823
chr5	28734472	28734836
chr5	28878592	28878956
chr5	29219568	29219932
chr5	29247794	29248158
chr5	29263989	29264353
chr5	29295875	29296195
chr5	29373710	29374074
chr5	29695175	29695539
chr5	29867332	29867696
chr5	30127415	30127779
chr5	30204864	30205184
chr5	30346297	30346617
chr5	31720100	31720464
chr5	32542575	32542955
chr5	32552608	32552928
chr5	32677983	32678303
chr5	32964256	32964620
chr5	33017961	33018325
chr5	33260377	33260741
chr5	33313284	33313648
chr5	33314950	33315314
chr5	33321146	33321510
chr5	33514976	33515296
chr5	34436852	34437232
chr5	34538222	34538542
chr5	36394140	36394504
chr5	36488078	36488442
chr5	36723981	36724301
chr5	36783294	36783614
chr5	36833230	36833610
chr5	37807068	37807448
chr5	37812492	37812755
chr5	38200993	38201357
chr5	38466529	38466893
chr5	39513936	39514300
chr5	39653192	39653556
chr5	39760913	39761277
chr5	39785484	39785848
chr5	40059496	40059876
chr5	40195158	40195522
chr5	40860851	40861215
chr5	41671217	41671581
chr5	42111309	42111629
chr5	42117286	42117666
chr5	42836984	42837304
chr5	42951475	42951855
chr5	43008192	43008556
chr5	43112873	43113237
chr5	43368437	43368801
chr5	44530877	44531241
chr5	44647979	44648343
chr5	44876125	44876489
chr5	44883583	44883903
chr5	44956121	44956485
chr5	44959122	44959486
chr5	44975608	44975928
chr5	45007245	45007609
chr5	49744134	49744514
chr5	50258796	50259116
chr5	52712205	52712569
chr5	52836553	52836917
chr5	52851106	52851253
chr5	53944492	53944639
chr5	54049474	54049854
chr5	54386958	54387043
chr5	54909722	54910042
chr5	54913342	54913662
chr5	55331907	55332227
chr5	55544990	55545085
chr5	55545076	55545440
chr5	55711083	55711463
chr5	55725043	55725168
chr5	55784089	55784409
chr5	55794130	55794494
chr5	55798046	55798426
chr5	56794911	56795291
chr5	57013853	57014217
chr5	57111914	57112278
chr5	57364588	57364908
chr5	57707656	57708036
chr5	57741991	57742355
chr5	61415458	61415778
chr5	61563971	61564335
chr5	62304564	62304884
chr5	62551405	62551769
chr5	63911693	63912073
chr5	65799857	65800023
chr5	65850102	65850482
chr5	66507790	66508154
chr5	66528927	66529307
chr5	66615182	66615502
chr5	66789509	66789889
chr5	67437271	67437651
chr5	68087901	68088221
chr5	68217347	68217510
chr5	68297553	68297873
chr5	68305665	68306045
chr5	68340955	68341275
chr5	68477795	68478159
chr5	68762311	68762631
chr5	71137829	71138193
chr5	71183449	71183829
chr5	71674854	71675044
chr5	71988677	71989041
chr5	72221859	72222223
chr5	72231566	72231886
chr5	73639025	73639345
chr5	75630484	75630735
[truncated: 4,224 more rows]
