# Supplementary material for: NF-Y Binding Site Architecture Defines a C-Fos Targeted Promoter Class
Source: PLoS One. 2016 Aug 12;11(8):e0160803. doi: 10.1371/journal.pone.0160803 (PMC4982600; doi:10.1371/journal.pone.0160803)
Supplement: S7 File — (BED) [file pone.0160803.s019.bed]

track name="CCAAT_repeat" description="CCAAT" visibility=3 url=
chr1 150208464 150208781
chr1 1334663 1334953
chr1 1981613 1981847
chr1 3541329 3541582
chr1 6845045 6845332
chr1 10270329 10270625
chr1 11322560 11322849
chr1 19229322 19229517
chr1 21672007 21672159
chr1 23670848 23671098
chr1 24286131 24286313
chr1 25757125 25757397
chr1 26560437 26560801
chr1 27339276 27339552
chr1 27816600 27816860
chr1 28585683 28586047
chr1 29676536 29676916
chr1 31769650 31769829
chr1 33116511 33116875
chr1 33502439 33502722
chr1 33937940 33938139
chr1 35658752 35659062
chr1 36235457 36235821
chr1 36851654 36851779
chr1 36916038 36916229
chr1 38156274 38156448
chr1 38158060 38158231
chr1 43147909 43148106
chr1 43311998 43312266
chr1 43920198 43920562
chr1 44115503 44115850
chr1 44172923 44173287
chr1 44435505 44435662
chr1 45140127 45140434
chr1 45956901 45957162
chr1 45957078 45957442
chr1 46598679 46598893
chr1 47779785 47780044
chr1 52344424 52344647
chr1 55352851 55353068
chr1 68150653 68151017
chr1 85156059 85156423
chr1 87379931 87380295
chr1 89458489 89458853
chr1 109940516 109940827
chr1 112938600 112938863
chr1 117602649 117602892
chr1 120838519 120838899
chr1 146989536 146989900
chr1 149858207 149858489
chr1 149859514 149859736
chr1 150254574 150254954
chr1 150459674 150459977
chr1 150602044 150602397
chr1 150669581 150670019
chr1 151254357 151254773
chr1 151319719 151319926
chr1 151762967 151763367
chr1 153643452 153643721
chr1 153700287 153700494
chr1 153895425 153895799
chr1 154946841 154947243
chr1 155197290 155197545
chr1 155214346 155214710
chr1 155579727 155580091
chr1 155715257 155715637
chr1 160990850 160991319
chr1 167522888 167523268
chr1 167691078 167691247
chr1 171750562 171750900
chr1 181057621 181057826
chr1 197115656 197116023
chr1 198906581 198906700
chr1 201915539 201915919
chr1 201924450 201924652
chr1 202830709 202830935
chr1 205290844 205291043
chr1 211752448 211752812
chr1 211848965 211849143
chr1 212458343 212458698
chr1 213123759 213123880
chr1 214776346 214776644
chr1 221915378 221915778
chr1 225965285 225965649
chr1 226112032 226112124
chr1 227127695 227127991
chr1 227751034 227751398
chr1 228594416 228594780
chr1 228645539 228645830
chr1 236958384 236958663
chr1 241683048 241683279
chr1 244211633 244211759
chr1 249132149 249132438
chr2 8821961 8822188
chr2 9144053 9144257
chr2 9771121 9771346
chr2 10091587 10091967
chr2 10183450 10183635
chr2 10262631 10262935
chr2 27008548 27008949
chr2 27274405 27274531
chr2 30369342 30369558
chr2 32502743 32503107
chr2 38830145 38830337
chr2 44395387 44395850
chr2 48133626 48133990
chr2 55746513 55746877
chr2 61292786 61293020
chr2 61765415 61765660
chr2 62081657 62081877
chr2 70141781 70142219
chr2 71454143 71454411
chr2 73460345 73460561
chr2 74425431 74425790
chr2 74881152 74881434
chr2 85822578 85822920
chr2 88926940 88927494
chr2 97405769 97405894
chr2 97481804 97482168
chr2 97523726 97524041
chr2 98280489 98280699
chr2 113522159 113522389
chr2 121010081 121010445
chr2 128784958 128785054
chr2 136633941 136634305
chr2 159313248 159313406
chr2 163200399 163200779
chr2 169746870 169747151
chr2 172949988 172950352
chr2 191745301 191745681
chr2 191878792 191879156
chr2 198317935 198318167
chr2 203499493 203499857
chr2 219134842 219135005
chr2 219824045 219824425
chr2 220094304 220094574
chr2 232329293 232329657
chr2 232378938 232379302
chr2 232573071 232573211
chr2 234763181 234763354
chr2 238875399 238875544
chr2 239197411 239197565
chr2 240322609 240322973
chr2 242626087 242626451
chr3 9791555 9791649
chr3 15901163 15901527
chr3 25706376 25706626
chr3 27410733 27411113
chr3 33482392 33482575
chr3 37034643 37035063
chr3 38206508 38206800
chr3 42003883 42004123
chr3 42530671 42531051
chr3 49761289 49761653
chr3 51422436 51422747
chr3 52091348 52091542
chr3 52570403 52570701
chr3 56591126 56591253
chr3 61237161 61237333
chr3 66551392 66551756
chr3 67048394 67048723
chr3 98620437 98620801
chr3 100211226 100211557
chr3 113415592 113415956
chr3 114866232 114866434
chr3 119813505 119814126
chr3 120461325 120461542
chr3 121468478 121468908
chr3 122134829 122135193
chr3 127871768 127872132
chr3 128902653 128903017
chr3 129147331 129147695
chr3 132756879 132757259
chr3 141868303 141868482
chr3 152878979 152879272
chr3 156272902 156273174
chr3 167452774 167453138
chr3 167813687 167813900
chr3 172468323 172468609
chr3 185303753 185303969
chr3 185826851 185827095
chr3 186288304 186288495
chr3 193853639 193853871
chr4 331381 331664
chr4 775593 775731
chr4 1283437 1283576
chr4 2263895 2264255
chr4 2470695 2470883
chr4 2845313 2845677
chr4 6271321 6271685
chr4 6674858 6675222
chr4 7069779 7070143
chr4 48782317 48782675
chr4 52709046 52709311
chr4 53578318 53578682
chr4 54232099 54232479
chr4 71858047 71858427
chr4 76555551 76555931
chr4 78077864 78078073
chr4 89513434 89513635
chr4 100871430 100871613
chr4 123653698 123653882
chr4 128553914 128554278
chr4 149363571 149363935
chr4 156680016 156680157
chr4 166248594 166248902
chr4 174255465 174255883
chr5 8457696 8457812
chr5 31532177 31532512
chr5 32313148 32313561
chr5 41904034 41904321
chr5 43313654 43313974
chr5 44808841 44809056
chr5 53606288 53606652
chr5 55290751 55291115
chr5 68462726 68463064
chr5 74632831 74633079
chr5 89705496 89705725
chr5 108745743 108745961
chr5 112312268 112312375
chr5 118406493 118406661
chr5 122847641 122847847
chr5 131520397 131520761
chr5 137548980 137549182
chr5 137878919 137879117
chr5 139780954 139781514
chr5 142149764 142149909
chr5 148737272 148737540
chr5 150632536 150632702
chr5 151150996 151151544
chr5 153825326 153825588
chr5 159546479 159546732
chr5 162864392 162864587
chr5 162887418 162887595
chr5 162930011 162930375
chr5 172483098 172483462
chr5 176853209 176853555
chr5 177580853 177581016
chr5 177631350 177631560
chr5 179719026 179719229
chr6 16129065 16129445
chr6 20401804 20402083
chr6 21593732 21594000
chr6 21593897 21594261
chr6 26020531 26020655
chr6 26032272 26032619
chr6 26033692 26034056
chr6 26043989 26044203
chr6 26045342 26045645
chr6 26103757 26104121
chr6 26123165 26123529
chr6 26124201 26124382
chr6 26158057 26158316
chr6 26199504 26199800
chr6 26216916 26217159
chr6 26251593 26251957
chr6 26271590 26271966
chr6 26457949 26458313
chr6 27099594 27099919
chr6 27100553 27100797
chr6 27114611 27114911
chr6 27775744 27775895
chr6 27777717 27777813
chr6 27782607 27782775
chr6 27806124 27806358
chr6 27832822 27833186
chr6 27840075 27840302
chr6 27860861 27861225
chr6 29716826 29716935
chr6 30457083 30457317
chr6 30585006 30585370
chr6 31126078 31126386
chr6 31324955 31325107
chr6 31707538 31707831
chr6 31830547 31830911
chr6 32407386 32407750
chr6 32920868 32921057
chr6 33079838 33080218
chr6 33172286 33172490
chr6 33216978 33217234
chr6 33285710 33285969
chr6 33385922 33386286
chr6 42713700 42714080
chr6 42952107 42952364
chr6 43138848 43139030
chr6 46097530 46097678
chr6 52149646 52149906
chr6 52528996 52529243
chr6 62996058 62996303
chr6 80247067 80247338
chr6 80714256 80714427
chr6 80816122 80816486
chr6 107077300 107077557
chr6 136571410 136571780
chr7 1199812 1200002
chr7 2671269 2671633
chr7 2884138 2884291
chr7 6048728 6048984
chr7 8008192 8008446
chr7 11012725 11012953
chr7 16685358 16685518
chr7 27702497 27702786
chr7 30066321 30066511
chr7 30544453 30544744
chr7 44122159 44122369
chr7 44887742 44888098
chr7 48074961 48075123
chr7 56119265 56119531
chr7 64023396 64023694
chr7 64126307 64126590
chr7 64254598 64254887
chr7 64363483 64363704
chr7 64467017 64467258
chr7 65540633 65540793
chr7 66461490 66461854
chr7 75623939 75624141
chr7 77427696 77428118
chr7 86974885 86975037
chr7 97881446 97881677
chr7 99070231 99070461
chr7 99746371 99746558
chr7 99774943 99775116
chr7 100136442 100136880
chr7 100209519 100209843
chr7 106301482 106301846
chr7 106809217 106809441
chr7 115850454 115850552
chr7 121784288 121784549
chr7 127292042 127292268
chr7 128379178 128379444
chr7 129074085 129074315
chr7 129710145 129710509
chr7 132937570 132937910
chr7 134331298 134331614
chr7 137686847 137687254
chr7 148581260 148581640
chr7 149535291 149535474
chr7 150725261 150725611
chr7 151216942 151217090
chr7 152160955 152161319
chr7 154719916 154720280
chr7 156803249 156803613
chr8 1771945 1772131
chr8 9009073 9009275
chr8 23386142 23386506
chr8 25315938 25316253
chr8 28347706 28348070
chr8 37619983 37620138
chr8 42010247 42010457
chr8 66546450 66546630
chr8 73920971 73921118
chr8 74884545 74884784
chr8 103424933 103425297
chr8 103667923 103668203
chr8 110551647 110551884
chr8 117961364 117961744
chr8 118532743 118532996
chr8 126010441 126010805
chr8 133787223 133787587
chr8 144691803 144692041
chr8 145743194 145743343
chr9 4792691 4792939
chr9 33473881 33474151
chr9 34523105 34523469
chr9 34989311 34989733
chr9 35072569 35072964
chr9 35815033 35815364
chr9 35829076 35829285
chr9 36190677 36190962
chr9 37465467 37465999
chr9 74526103 74526360
chr9 80911884 80912067
chr9 82186425 82186745
chr9 91925879 91926149
chr9 95527078 95527442
chr9 96792915 96793127
chr9 99382098 99382398
chr9 104295704 104295896
chr9 123476723 123477020
chr9 125590808 125590983
chr9 127905813 127905984
chr9 128003624 128003999
chr9 130158933 130159444
chr9 130477917 130478097
chr9 130693046 130693237
chr9 130743208 130743572
chr9 130829611 130829919
chr9 130830149 130830340
chr9 131798615 131798979
chr9 131940508 131940805
chr9 133588007 133588327
chr9 135905792 135906098
chr9 139780633 139780946
chr9 140095237 140095553
chr9 140135312 140135794
chr9 140484875 140485239
chrX 14891281 14891645
chrX 15353627 15354004
chrX 18443475 18443673
chrX 40439998 40440208
chrX 44732188 44732371
chrX 46696142 46696435
chrX 47004457 47004641
chrX 47077324 47077688
chrX 47509949 47510151
chrX 48056211 48056575
chrX 48379963 48380260
chrX 48776227 48776591
chrX 48958041 48958402
chrX 49125546 49125921
chrX 53024593 53024973
chrX 53111263 53111534
chrX 53123019 53123367
chrX 64754679 64754805
chrX 71401265 71401579
chrX 77151047 77151150
chrX 106449623 106449848
chrX 128977731 128978095
chrX 130037059 130037423
chrX 134477883 134478247
chrX 151999268 151999594
chrX 153363290 153363501
chrX 153607099 153607463
chrX 153656810 153657048
chrX 154444428 154444801
chr10 977572 977936
chr10 1094820 1095092
chr10 3827579 3827776
chr10 12110814 12110962
chr10 13203374 13203573
chr10 15130750 15130939
chr10 25013469 25013849
chr10 46168152 46168436
chr10 70660761 70661125
chr10 70748305 70748557
chr10 72142337 72142701
chr10 74033540 74033648
chr10 74868872 74869236
chr10 76585882 76586424
chr10 91461138 91461356
chr10 97453589 97453969
chr10 101190324 101190710
chr10 101380161 101380571
chr10 101418959 101419323
chr10 102106585 102106949
chr10 102133172 102133357
chr10 104005105 104005318
chr10 104677793 104678144
chr10 105991962 105992326
chr10 120788874 120788969
chr10 124913742 124913932
chr10 129924706 129924829
chr11 560810 561026
chr11 3400339 3400611
chr11 4629418 4629647
chr11 10830481 10830687
chr11 10879484 10879848
chr11 13298911 13299263
chr11 13689864 13690255
chr11 14913752 14913912
chr11 17298047 17298347
chr11 22647268 22647613
chr11 27494372 27494494
chr11 34379530 34379769
chr11 34460265 34460536
chr11 43701984 43702348
chr11 47788922 47789307
chr11 57435236 57435616
chr11 57479713 57480056
chr11 58346259 58346623
chr11 59383252 59383987
chr11 61717135 61717339
chr11 61891199 61891563
chr11 62359176 62359277
chr11 62495176 62495648
chr11 62521532 62521997
chr11 63741720 63742043
chr11 64546242 64546436
chr11 64684717 64684895
chr11 65122062 65122193
chr11 65382819 65383154
chr11 65601222 65601496
chr11 66056492 66056907
chr11 66383939 66384139
chr11 67888805 67889035
chr11 68227886 68228207
chr11 75526058 75526336
chr11 82612613 82612822
chr11 82867909 82868273
chr11 95522952 95523258
chr11 105893004 105893387
chr11 108535502 108535866
chr11 111797615 111797979
chr11 118966201 118966563
chr11 119204947 119205250
chr11 122932772 122933152
chr11 126138799 126139065
chr11 129684473 129684837
chr11 129684672 129685036
chr11 129939542 129939922
chr11 133826819 133827076
chr12 2999921 3000072
chr12 6602962 6603198
chr12 6665111 6665475
chr12 6961037 6961238
chr12 7125928 7126292
chr12 7282802 7283027
chr12 14927065 14927404
chr12 21654464 21654817
chr12 49259612 49259840
chr12 49716748 49717124
chr12 50135103 50135289
chr12 53473149 53473425
chr12 53773189 53773956
chr12 53894381 53894761
chr12 54718663 54718950
chr12 56390846 56391071
chr12 56617935 56618190
chr12 56694034 56694398
chr12 56727748 56727990
chr12 56882111 56882491
chr12 57039726 57040067
chr12 57472508 57472854
chr12 58087620 58087941
chr12 58138575 58138866
chr12 67662575 67662670
chr12 68726153 68726330
chr12 77459326 77459535
chr12 95611254 95611618
chr12 96252591 96252768
chr12 104323745 104324176
chr12 108908721 108909006
chr12 110011380 110011582
chr12 110318270 110318634
chr12 111806791 111807155
chr12 112563168 112563365
chr12 113658816 113659170
chr12 114211449 114211617
chr12 121837682 121837899
chr12 131648651 131649015
chr13 20207649 20207801
chr13 29293034 29293306
chr13 31040052 31040257
chr13 52586347 52586491
chr13 73301773 73302126
chr13 98085186 98085566
chr13 101327113 101327360
chr13 103249091 103249455
chr13 107187945 107188215
chr14 20929607 20930151
chr14 21737539 21737962
chr14 23388434 23388700
chr14 23398505 23398869
chr14 23755274 23755692
chr14 23938499 23938876
chr14 24641046 24641249
chr14 36295304 36295668
chr14 39644171 39644459
chr14 52455985 52456349
chr14 53019250 53019609
chr14 55658232 55658532
chr14 58764882 58765326
chr14 64010023 64010286
chr14 64108619 64108801
chr14 69445992 69446270
chr14 73360843 73360942
chr14 73925212 73925583
chr14 74551088 74551463
chr14 74960274 74960490
chr14 78083025 78083531
chr14 82000198 82000548
chr14 86400710 86401090
chr14 90920674 90921038
chr14 91526967 91527563
chr14 96000985 96001401
chr14 100842624 100842815
chr14 104181765 104182087
chr15 40732984 40733164
chr15 41245453 41245638
chr15 41575915 41576253
chr15 44487491 44487743
chr15 59397151 59397433
chr15 65117942 65118322
chr15 69113198 69113469
chr15 71055746 71056110
chr15 76628855 76628986
chr15 78799548 78799912
chr15 80351753 80352117
chr15 81616416 81616780
chr15 83478119 83478480
chr15 89164399 89164596
chr15 89631356 89631716
chr15 90118450 90118792
chr15 91260404 91260612
chr15 93425531 93425786
chr15 98503520 98503900
chr16 103570 103790
chr16 1662022 1662236
chr16 1993107 1993487
chr16 2205480 2205667
chr16 2264771 2265127
chr16 2479115 2479331
chr16 2932708 2932938
chr16 3333212 3333513
chr16 4743364 4743728
chr16 4784235 4784615
chr16 4852838 4853126
chr16 4897232 4897519
chr16 8768324 8768479
chr16 9185201 9185461
chr16 11036233 11036597
chr16 11439132 11439349
chr16 15982485 15982630
chr16 21964240 21964604
chr16 22385908 22386111
chr16 25042938 25043135
chr16 25122952 25123046
chr16 28962002 28962367
chr16 30381780 30382374
chr16 30441286 30441650
chr16 30597066 30597235
chr16 30759560 30759664
chr16 31724375 31724646
chr16 31884969 31885172
chr16 50058937 50059154
chr16 56485231 56485493
chr16 57219941 57220207
chr16 57769211 57769719
chr16 58663714 58664155
chr16 68278998 68279362
chr16 69458251 69458511
chr16 74700720 74701024
chr16 75498565 75498763
chr16 77224499 77224868
chr16 84224518 84224882
chr16 84651660 84651920
chr16 87351013 87351104
chr16 88729476 88729804
chr16 89557004 89557339
chr17 1619498 1619897
chr17 1733040 1733404
chr17 4613563 4613718
chr17 5322955 5323171
chr17 6347577 6347754
chr17 7307399 7307584
chr17 7307501 7307865
chr17 8055734 8055863
chr17 8093486 8093717
chr17 8113893 8114080
chr17 8198700 8198863
chr17 8534155 8534469
chr17 12921252 12921547
chr17 16283937 16284301
chr17 16945520 16945730
chr17 17875717 17876152
chr17 17942536 17942811
chr17 18163716 18163891
chr17 26368208 26368787
chr17 26645951 26646260
chr17 36908818 36909078
chr17 37558713 37559077
chr17 38443865 38444200
chr17 38574127 38574559
chr17 39942976 39943373
chr17 40540457 40540746
chr17 40829089 40829310
chr17 41623791 41623987
chr17 42422472 42422691
chr17 43025083 43025254
chr17 45726994 45727347
chr17 45973107 45973618
chr17 46125370 46125697
chr17 46184734 46184986
chr17 47785561 47785681
chr17 47841498 47841878
chr17 56595205 56595683
chr17 59940847 59941043
chr17 61627487 61627873
chr17 61699344 61699611
chr17 61699533 61699897
chr17 66031712 66031935
chr17 73285497 73285658
chr17 73452559 73452727
chr17 73775855 73776252
chr17 74236515 74236767
chr17 74260986 74261402
chr17 76183107 76183319
chr17 79008550 79008914
chr17 79196720 79196985
chr17 79650743 79651029
chr17 79818514 79818935
chr17 79980815 79981188
chr17 80056570 80056840
chr17 80477339 80477703
chr18 12991021 12991385
chr18 23806217 23806597
chr18 44526502 44526882
chr18 59854234 59854438
chr19 797190 797480
chr19 1103758 1104075
chr19 1205517 1205730
chr19 1449826 1450206
chr19 1490915 1491111
chr19 2269284 2269459
chr19 2475828 2476192
chr19 2841289 2841517
chr19 2866840 2867399
chr19 2900575 2900942
chr19 2944883 2945232
chr19 3557573 3557764
chr19 3572585 3572865
chr19 4342686 4343143
chr19 4402272 4402563
chr19 4471628 4471903
chr19 4472010 4472338
chr19 4639185 4639549
chr19 4968607 4969124
chr19 5904345 5904709
chr19 6279882 6280246
chr19 6424786 6425252
chr19 6425190 6425397
chr19 6737549 6737958
chr19 7894664 7895098
chr19 8070559 8070670
chr19 8477920 8478284
chr19 9434251 9434615
chr19 9945815 9945981
chr19 10491184 10491544
chr19 10828163 10828767
chr19 11266536 11266755
chr19 11456901 11457265
chr19 12273762 12273901
chr19 12662238 12662604
chr19 12847643 12848119
chr19 13001619 13001843
chr19 13049116 13049416
chr19 13905885 13906271
chr19 14117063 14117549
chr19 14228522 14228897
chr19 14247379 14247779
chr19 14606915 14607179
chr19 14640188 14640413
chr19 15236549 15236808
chr19 15529728 15530117
chr19 16607001 16607205
chr19 16770910 16771152
chr19 17377786 17378281
chr19 17420087 17420464
chr19 17580992 17581212
chr19 17858198 17858522
chr19 17970543 17970723
chr19 18303534 18304024
chr19 18303534 18304008
chr19 18314923 18315340
chr19 19030318 19030494
chr19 19174312 19174846
chr19 19496236 19496619
chr19 19932502 19932729
chr19 19976533 19976717
chr19 20011567 20011782
chr19 20150169 20150549
chr19 20188510 20188890
chr19 20277755 20278135
chr19 20607611 20607991
chr19 20748560 20748767
chr19 20844249 20844629
chr19 21105913 21106136
chr19 21203274 21203511
chr19 21264821 21265053
chr19 21324732 21324893
chr19 21541679 21541775
chr19 21579810 21579976
chr19 22034750 22035130
chr19 23433049 23433429
chr19 23869927 23870203
chr19 23941557 23941937
chr19 23945661 23945799
chr19 24097410 24097790
chr19 24216038 24216418
chr19 33462855 33463228
chr19 33864396 33864760
chr19 36119654 36119970
chr19 36248685 36249098
chr19 36266174 36266400
chr19 36505135 36505398
chr19 36545540 36545843
chr19 36822619 36822999
chr19 37288132 37288348
chr19 37742407 37742787
chr19 39421319 39421598
chr19 39616153 39616453
chr19 39881756 39881979
chr19 40950236 40950379
chr19 41082572 41082887
chr19 41256607 41256971
chr19 42580079 42580318
chr19 42901044 42901354
chr19 45393981 45394279
chr19 46148786 46149150
chr19 46195721 46195962
chr19 46498425 46498710
chr19 47551792 47552119
chr19 48018304 48018668
chr19 48972221 48972582
chr19 49140777 49141013
chr19 49457778 49458142
chr19 49468390 49468579
chr19 49496527 49496809
chr19 49622271 49622635
chr19 50179898 50180373
chr19 50269591 50270242
chr19 50528762 50529014
chr19 51869644 51870008
chr19 52692930 52693222
chr19 54640681 54641055
chr19 54641012 54641446
chr19 55677944 55678216
chr19 55850700 55851298
chr19 55919555 55919748
chr19 55972997 55973394
chr19 57998908 57999272
chr19 58790108 58790402
chr20 590852 591232
chr20 17662881 17663132
chr20 32274082 32274446
chr20 32308171 32308349
chr20 37554763 37555126
chr20 40247000 40247240
chr20 42086084 42086298
chr20 44440905 44441329
chr20 44485981 44486296
chr20 45985471 45985644
chr20 48770273 48770452
chr20 49347634 49347998
chr20 54967237 54967479
chr20 60982338 60982467
chr21 34852231 34852595
chr21 34915084 34915467
chr21 35014436 35014691
chr21 43916382 43916746
chr21 47743741 47743995
chr21 47878596 47878735
chr22 19132169 19132371
chr22 19467225 19467494
chr22 20004319 20004564
chr22 20067565 20067769
chr22 21996331 21996631
chr22 22006269 22006470
chr22 24181198 24181376
chr22 24372831 24373145
chr22 29137774 29138138
chr22 29196443 29196807
chr22 31477023 31477387
chr22 32517644 32518024
chr22 37172093 37172543
chr22 38054277 38054629
chr22 38054461 38054825
chr22 38240355 38240636
chr22 39151870 39152234
chr22 39915967 39916331
chr22 40440494 40440850
chr22 41032751 41032926
chr22 41601216 41601387
chr22 41763061 41763425
chr22 42486721 42487085
chr22 43411145 43411452
chr22 50312089 50312298
chr22 50353838 50354202
chr22 51021368 51021577
