# Supplementary material for: NF-Y Binding Site Architecture Defines a C-Fos Targeted Promoter Class
Source: PLoS One. 2016 Aug 12;11(8):e0160803. doi: 10.1371/journal.pone.0160803 (PMC4982600; doi:10.1371/journal.pone.0160803)
Supplement: S8 File — (BED) [file pone.0160803.s020.bed]

track name="CCAAT_repeat_plus_P300" description="CCAAT_plus_p300" visibility=3 url=
chr1	150208464	150208781
chr1	1334663	1334953
chr1	1981613	1981847
chr1	10270329	10270625
chr1	11322560	11322849
chr1	19229322	19229517
chr1	21672007	21672159
chr1	23670848	23671098
chr1	24286131	24286313
chr1	26560437	26560801
chr1	27339276	27339552
chr1	27816600	27816860
chr1	28585683	28586047
chr1	33502439	33502722
chr1	33937940	33938139
chr1	35658752	35659062
chr1	36235457	36235821
chr1	38156274	38156448
chr1	43147909	43148106
chr1	44115503	44115850
chr1	44172923	44173287
chr1	45140127	45140434
chr1	46598679	46598893
chr1	47779785	47780044
chr1	52344424	52344647
chr1	55352851	55353068
chr1	68150653	68151017
chr1	85156059	85156423
chr1	89458489	89458853
chr1	117602649	117602892
chr1	149858207	149858489
chr1	149859514	149859736
chr1	150459674	150459977
chr1	150602044	150602397
chr1	150669581	150670019
chr1	151319719	151319926
chr1	151762967	151763367
chr1	153643452	153643721
chr1	153700287	153700494
chr1	153895425	153895799
chr1	155214346	155214710
chr1	155715257	155715637
chr1	160990850	160991319
chr1	167522888	167523268
chr1	171750562	171750900
chr1	181057621	181057826
chr1	197115656	197116023
chr1	201924450	201924652
chr1	211752448	211752812
chr1	211848965	211849143
chr1	212458343	212458698
chr1	214776346	214776644
chr1	221915378	221915778
chr1	225965285	225965649
chr1	226112032	226112124
chr1	227751034	227751398
chr1	236958384	236958663
chr1	241683048	241683279
chr1	244211633	244211759
chr1	249132149	249132438
chr2	8821961	8822188
chr2	9771121	9771346
chr2	10091587	10091967
chr2	10183450	10183635
chr2	10262631	10262935
chr2	27274405	27274531
chr2	30369342	30369558
chr2	32502743	32503107
chr2	38830145	38830337
chr2	44395387	44395850
chr2	48133626	48133990
chr2	61765415	61765660
chr2	70141781	70142219
chr2	88926940	88927494
chr2	97405769	97405894
chr2	97481804	97482168
chr2	98280489	98280699
chr2	113522159	113522389
chr2	191878792	191879156
chr2	198317935	198318167
chr2	203499493	203499857
chr2	219134842	219135005
chr2	232329293	232329657
chr2	232378938	232379302
chr2	232573071	232573211
chr2	234763181	234763354
chr2	238875399	238875544
chr2	239197411	239197565
chr2	242626087	242626451
chr3	9791555	9791649
chr3	25706376	25706626
chr3	37034643	37035063
chr3	38206508	38206800
chr3	42003883	42004123
chr3	42530671	42531051
chr3	66551392	66551756
chr3	98620437	98620801
chr3	114866232	114866434
chr3	119813505	119814126
chr3	121468478	121468908
chr3	122134829	122135193
chr3	127871768	127872132
chr3	141868303	141868482
chr3	152878979	152879272
chr3	156272902	156273174
chr3	167813687	167813900
chr3	172468323	172468609
chr3	185303753	185303969
chr3	185826851	185827095
chr3	186288304	186288495
chr3	193853639	193853871
chr4	331381	331664
chr4	2263895	2264255
chr4	2470695	2470883
chr4	7069779	7070143
chr4	54232099	54232479
chr4	78077864	78078073
chr4	100871430	100871613
chr4	123653698	123653882
chr4	166248594	166248902
chr4	174255465	174255883
chr5	8457696	8457812
chr5	41904034	41904321
chr5	43313654	43313974
chr5	44808841	44809056
chr5	53606288	53606652
chr5	55290751	55291115
chr5	74632831	74633079
chr5	89705496	89705725
chr5	112312268	112312375
chr5	118406493	118406661
chr5	122847641	122847847
chr5	137878919	137879117
chr5	139780954	139781514
chr5	148737272	148737540
chr5	151150996	151151544
chr5	162864392	162864587
chr5	162887418	162887595
chr5	162930011	162930375
chr5	172483098	172483462
chr5	177631350	177631560
chr6	16129065	16129445
chr6	21593732	21594000
chr6	21593897	21594261
chr6	26020531	26020655
chr6	26032272	26032619
chr6	26033692	26034056
chr6	26045342	26045645
chr6	26103757	26104121
chr6	26123165	26123529
chr6	26124201	26124382
chr6	26158057	26158316
chr6	26199504	26199800
chr6	26216916	26217159
chr6	26251593	26251957
chr6	27099594	27099919
chr6	27100553	27100797
chr6	27114611	27114911
chr6	27777717	27777813
chr6	27806124	27806358
chr6	27832822	27833186
chr6	27860861	27861225
chr6	30585006	30585370
chr6	31707538	31707831
chr6	31830547	31830911
chr6	32407386	32407750
chr6	32920868	32921057
chr6	33385922	33386286
chr6	42713700	42714080
chr6	43138848	43139030
chr6	52149646	52149906
chr6	52528996	52529243
chr6	80714256	80714427
chr6	80816122	80816486
chr6	136571410	136571780
chr7	1199812	1200002
chr7	8008192	8008446
chr7	11012725	11012953
chr7	16685358	16685518
chr7	27702497	27702786
chr7	30066321	30066511
chr7	30544453	30544744
chr7	44122159	44122369
chr7	44887742	44888098
chr7	64023396	64023694
chr7	64126307	64126590
chr7	64254598	64254887
chr7	65540633	65540793
chr7	75623939	75624141
chr7	77427696	77428118
chr7	99070231	99070461
chr7	100136442	100136880
chr7	100209519	100209843
chr7	106301482	106301846
chr7	115850454	115850552
chr7	121784288	121784549
chr7	128379178	128379444
chr7	129710145	129710509
chr7	134331298	134331614
chr7	137686847	137687254
chr7	149535291	149535474
chr7	151216942	151217090
chr7	152160955	152161319
chr8	23386142	23386506
chr8	25315938	25316253
chr8	42010247	42010457
chr8	66546450	66546630
chr8	74884545	74884784
chr8	103424933	103425297
chr8	103667923	103668203
chr8	110551647	110551884
chr8	118532743	118532996
chr8	126010441	126010805
chr8	145743194	145743343
chr9	4792691	4792939
chr9	33473881	33474151
chr9	35072569	35072964
chr9	36190677	36190962
chr9	37465467	37465999
chr9	74526103	74526360
chr9	80911884	80912067
chr9	82186425	82186745
chr9	91925879	91926149
chr9	125590808	125590983
chr9	130829611	130829919
chr9	130830149	130830340
chr9	131798615	131798979
chr9	133588007	133588327
chr9	135905792	135906098
chr9	140135312	140135794
chrX	47077324	47077688
chrX	48379963	48380260
chrX	48776227	48776591
chrX	53024593	53024973
chrX	53111263	53111534
chrX	64754679	64754805
chr10	1094820	1095092
chr10	3827579	3827776
chr10	12110814	12110962
chr10	13203374	13203573
chr10	46168152	46168436
chr10	70660761	70661125
chr10	70748305	70748557
chr10	74033540	74033648
chr10	76585882	76586424
chr10	91461138	91461356
chr10	97453589	97453969
chr10	101190324	101190710
chr10	102106585	102106949
chr10	102133172	102133357
chr10	104005105	104005318
chr11	3400339	3400611
chr11	10830481	10830687
chr11	13689864	13690255
chr11	27494372	27494494
chr11	34460265	34460536
chr11	47788922	47789307
chr11	57435236	57435616
chr11	57479713	57480056
chr11	58346259	58346623
chr11	61717135	61717339
chr11	61891199	61891563
chr11	62359176	62359277
chr11	62495176	62495648
chr11	63741720	63742043
chr11	64546242	64546436
chr11	65382819	65383154
chr11	66383939	66384139
chr11	67888805	67889035
chr11	68227886	68228207
chr11	75526058	75526336
chr11	82612613	82612822
chr11	82867909	82868273
chr11	95522952	95523258
chr11	105893004	105893387
chr11	111797615	111797979
chr11	118966201	118966563
chr11	122932772	122933152
chr11	126138799	126139065
chr11	129939542	129939922
chr12	6602962	6603198
chr12	7125928	7126292
chr12	14927065	14927404
chr12	50135103	50135289
chr12	53773189	53773956
chr12	54718663	54718950
chr12	56390846	56391071
chr12	56617935	56618190
chr12	56694034	56694398
chr12	56727748	56727990
chr12	57039726	57040067
chr12	57472508	57472854
chr12	67662575	67662670
chr12	77459326	77459535
chr12	95611254	95611618
chr12	96252591	96252768
chr12	104323745	104324176
chr12	110011380	110011582
chr12	114211449	114211617
chr12	121837682	121837899
chr13	73301773	73302126
chr13	98085186	98085566
chr13	103249091	103249455
chr14	20929607	20930151
chr14	21737539	21737962
chr14	23398505	23398869
chr14	23755274	23755692
chr14	23938499	23938876
chr14	24641046	24641249
chr14	36295304	36295668
chr14	39644171	39644459
chr14	53019250	53019609
chr14	58764882	58765326
chr14	64010023	64010286
chr14	64108619	64108801
chr14	73925212	73925583
chr14	74551088	74551463
chr14	82000198	82000548
chr14	91526967	91527563
chr14	96000985	96001401
chr14	100842624	100842815
chr15	41245453	41245638
chr15	41575915	41576253
chr15	44487491	44487743
chr15	65117942	65118322
chr15	71055746	71056110
chr15	76628855	76628986
chr15	80351753	80352117
chr15	89631356	89631716
chr15	93425531	93425786
chr15	98503520	98503900
chr16	3333212	3333513
chr16	4784235	4784615
chr16	8768324	8768479
chr16	9185201	9185461
chr16	21964240	21964604
chr16	25042938	25043135
chr16	30441286	30441650
chr16	30597066	30597235
chr16	30759560	30759664
chr16	50058937	50059154
chr16	57769211	57769719
chr16	58663714	58664155
chr16	68278998	68279362
chr16	69458251	69458511
chr16	74700720	74701024
chr16	75498565	75498763
chr16	89557004	89557339
chr17	1619498	1619897
chr17	4613563	4613718
chr17	5322955	5323171
chr17	7307399	7307584
chr17	7307501	7307865
chr17	8113893	8114080
chr17	12921252	12921547
chr17	16283937	16284301
chr17	16945520	16945730
chr17	17942536	17942811
chr17	18163716	18163891
chr17	36908818	36909078
chr17	38443865	38444200
chr17	38574127	38574559
chr17	39942976	39943373
chr17	40540457	40540746
chr17	40829089	40829310
chr17	41623791	41623987
chr17	42422472	42422691
chr17	43025083	43025254
chr17	45726994	45727347
chr17	46125370	46125697
chr17	46184734	46184986
chr17	47785561	47785681
chr17	47841498	47841878
chr17	56595205	56595683
chr17	59940847	59941043
chr17	61627487	61627873
chr17	61699344	61699611
chr17	66031712	66031935
chr17	73285497	73285658
chr17	73452559	73452727
chr17	73775855	73776252
chr17	74260986	74261402
chr17	76183107	76183319
chr17	79196720	79196985
chr17	79650743	79651029
chr17	79818514	79818935
chr17	79980815	79981188
chr17	80056570	80056840
chr17	80477339	80477703
chr18	12991021	12991385
chr18	23806217	23806597
chr19	797190	797480
chr19	1205517	1205730
chr19	1449826	1450206
chr19	2475828	2476192
chr19	2866840	2867399
chr19	3572585	3572865
chr19	4402272	4402563
chr19	4472010	4472338
chr19	4639185	4639549
chr19	6279882	6280246
chr19	6737549	6737958
chr19	7894664	7895098
chr19	8477920	8478284
chr19	9434251	9434615
chr19	10491184	10491544
chr19	10828163	10828767
chr19	11456901	11457265
chr19	12847643	12848119
chr19	13905885	13906271
chr19	14117063	14117549
chr19	14247379	14247779
chr19	14606915	14607179
chr19	14640188	14640413
chr19	15529728	15530117
chr19	16607001	16607205
chr19	17377786	17378281
chr19	18314923	18315340
chr19	19030318	19030494
chr19	19496236	19496619
chr19	19976533	19976717
chr19	20150169	20150549
chr19	21203274	21203511
chr19	24097410	24097790
chr19	33462855	33463228
chr19	36119654	36119970
chr19	36266174	36266400
chr19	36505135	36505398
chr19	36545540	36545843
chr19	36822619	36822999
chr19	37288132	37288348
chr19	39421319	39421598
chr19	39616153	39616453
chr19	39881756	39881979
chr19	40950236	40950379
chr19	41256607	41256971
chr19	48018304	48018668
chr19	48972221	48972582
chr19	49140777	49141013
chr19	49457778	49458142
chr19	49468390	49468579
chr19	49496527	49496809
chr19	49622271	49622635
chr19	50179898	50180373
chr19	50269591	50270242
chr19	52692930	52693222
chr19	54640681	54641055
chr19	54641012	54641446
chr19	55677944	55678216
chr19	55919555	55919748
chr19	58790108	58790402
chr20	37554763	37555126
chr20	44485981	44486296
chr20	45985471	45985644
chr20	49347634	49347998
chr20	54967237	54967479
chr20	60982338	60982467
chr21	34915084	34915467
chr21	43916382	43916746
chr21	47878596	47878735
chr22	19132169	19132371
chr22	19467225	19467494
chr22	20067565	20067769
chr22	21996331	21996631
chr22	22006269	22006470
chr22	29196443	29196807
chr22	39915967	39916331
chr22	41601216	41601387
chr22	41763061	41763425
chr22	42486721	42487085
chr22	50353838	50354202
